# Supplementary material
Source: PubMed Central journal article supplement (PMC4668596)
Supplement: NIHMS65542-supplement-1.pdf [file NIHMS65542-supplement-1.pdf]

**Supplementary Table 1. Study sample characteristics and genotyping.**

**(a) Metabochip meta-analysis**

| Study        | Country of origin                                                      | T2D status | Sample characteristics      |                       |                                    |                                    |                                    | Genotyping array |
|--------------|------------------------------------------------------------------------|------------|-----------------------------|-----------------------|------------------------------------|------------------------------------|------------------------------------|------------------|
|              |                                                                        |            | Sample size (males/females) | Age (years) mean (SD) | Age of diagnosis (years) mean (SD) | Fasting glucose (mmol/l) mean (SD) | BMI (kg/m <sup>2</sup> ) mean (SD) |                  |
| InterACT-CMC | France, Germany, Greece, Italy, Netherlands, Norway, Spain, Sweden, UK | Cases      | 3,553 (1,731/2,069)         | N/A                   | N/A                                | N/A                                | N/A                                | Metabochip       |
|              |                                                                        | Controls   | 5,887 (2,069/3,818)         | N/A                   |                                    | N/A                                | N/A                                |                  |
| PMB          | Finland, Sweden                                                        | Cases      | 4,976 (2,908/2,064)         | 58.8 (12.5)           | N/A                                | N/A                                | 28.2 (8.7)                         | Metabochip       |
|              |                                                                        | Controls   | 3,500 (1,701/1,798)         | 58.3 (8.4)            |                                    | N/A                                | 26.4 (4.4)                         |                  |
| GoDARTS      | UK                                                                     | Cases      | 3,298 (1,940/1,358)         | 63.5 (9.6)            | 55.9 (8.9)                         | N/A                                | 31.9 (6.3)                         | Metabochip       |
|              |                                                                        | Controls   | 3,708 (1,918/1,790)         | 59.1 (11.3)           |                                    | 4.9 (0.5)                          | 27.0 (4.5)                         |                  |
| DANISH       | Denmark                                                                | Cases      | 1,892 (1,188/707)           | 60.8 (11.1)           | 53.0 (10.7)                        | N/A                                | 30.2 (5.5)                         | Metabochip       |
|              |                                                                        | Controls   | 6,603 (2,953/3,650)         | 46.3 (10.0)           |                                    | 5.5 (1.1)                          | 25.5 (4.2)                         |                  |
| DGDG         | France                                                                 | Cases      | 2,019 (1,231/788)           | 59.4 (10.7)           | 49.7 (10.7)                        | N/A                                | 28.0 (3.8)                         | Metabochip       |
|              |                                                                        | Controls   | 3,188 (1,441/1,747)         | 52.2 (8.4)            |                                    | 5.3 (0.4)                          | 25.2 (3.7)                         |                  |
| KORA         | Germany                                                                | Cases      | 1,207 (662/545)             | 62.9 (9.9)            | N/A                                | N/A                                | 30.9 (5.3)                         | Metabochip       |
|              |                                                                        | Controls   | 5,673 (2,718/2,955)         | 55.9 (13.0)           |                                    | N/A                                | 27.3 (4.5)                         |                  |
| Warren2/58BC | UK                                                                     | Cases      | 1,117 (647/470)             | N/A                   | 45.5 (11.0)                        | N/A                                | 32.2 (6.6)                         | Metabochip       |
|              |                                                                        | Controls   | 4,224 (2,394/1,830)         | N/A                   |                                    | N/A                                | N/A                                |                  |
| IMPROVE      | Sweden                                                                 | Cases      | 904 (517/387)               | 64.3 (5.6)            | N/A                                | 7.7 (2.2)                          | 29.2 (4.6)                         | Metabochip       |
|              |                                                                        | Controls   | 2,525 (1,140/1,385)         | 64.2 (5.3)            |                                    | 5.3 (0.7)                          | 26.5 (3.9)                         |                  |
| HUNT/TROMSO  | Norway                                                                 | Cases      | 1,239 (628/611)             | 64.0 (12.9)           | 61.9 (11.9)                        | N/A                                | 29.2 (4.8)                         | Metabochip       |
|              |                                                                        | Controls   | 1,375 (691/684)             | 63.5 (13.9)           |                                    | N/A                                | 26.5 (4.0)                         |                  |
| FUSION2      | Finland                                                                | Cases      | 1,037 (584/453)             | 59.7 (8.4)            | 54.7 (7.4)                         | 7.7 (2.3)                          | 30.8 (5.4)                         | Metabochip       |
|              |                                                                        | Controls   | 1,154 (689/465)             | 59.0 (7.6)            |                                    | 5.4 (0.4)                          | 26.9 (3.9)                         |                  |
| EMIL-Ulm     | Germany                                                                | Cases      | 755 (510/245)               | 48.7 (12.0)           | 45.5 (10.8)                        | N/A                                | 28.6 (7.1)                         | Metabochip       |
|              |                                                                        | Controls   | 1,632 (765/867)             | 45.1 (10.9)           |                                    | N/A                                | 26.7 (5.0)                         |                  |
| DILGOM       | Finland                                                                | Cases      | 541 (298/243)               | 60.5 (10.3)           | N/A                                | N/A                                | 30.1 (5.6)                         | Metabochip       |
|              |                                                                        | Controls   | 3,357 (1,482/1,875)         | 50.9 (13.5)           |                                    | N/A                                | 26.5 (4.5)                         |                  |
| HNR          | Germany                                                                | Cases      | 520 (315/205)               | 62.6 (7.2)            | N/A                                | N/A                                | 30.4 (5.2)                         | Metabochip       |
|              |                                                                        | Controls   | 3,932 (1,911/2,021)         | 59.2 (7.8)            |                                    | N/A                                | 27.5 (4.4)                         |                  |
| EGCUT        | Estonia                                                                | Cases      | 912 (342/570)               | 64.1 (10.5)           | N/A                                | N/A                                | 33.4 (5.4)                         | Metabochip       |
|              |                                                                        | Controls   | 889 (326/563)               | 51.7 (10.7)           |                                    | N/A                                | 22.3 (2.5)                         |                  |
| METSIM       | Finland                                                                | Cases      | 1,167 (1,167/0)             | 60.5 (6.6)            | 57.0 (8.0)                         | 7.5 (2.0)                          | 30.2 (5.2)                         | Metabochip       |
|              |                                                                        | Controls   | 651 (651/0)                 | 53.8 (5.0)            |                                    | 5.5 (0.3)                          | 25.9 (3.1)                         |                  |
| D2D2007      | Finland                                                                | Cases      | 454 (269/185)               | 63.4 (7.6)            | 55.7 (9.7)                         | 7.7 (1.8)                          | 30.6 (5.6)                         | Metabochip       |
|              |                                                                        | Controls   | 1,229 (455/774)             | 58.1 (8.2)            |                                    | 5.6 (0.3)                          | 26.2 (4.3)                         |                  |
| SCARFSHEEP   | Sweden                                                                 | Cases      | 314 (227/87)                | 59.6 (7.0)            | N/A                                | 8.12(5.4)                          | 27.4 (8.4)                         | Metabochip       |
|              |                                                                        | Controls   | 2,906 (2,079/827)           | 57.9 (7.3)            |                                    | 4.0 (3.8)                          | 25.4 (6.1)                         |                  |

|          |         |          |                 |             |             |           |             |            |
|----------|---------|----------|-----------------|-------------|-------------|-----------|-------------|------------|
| DIAGEN   | Germany | Cases    | 437 (218/219)   | 66.0 (11.9) | 66.0 (11.9) | 9.0 (2.6) | 30.1 (6.2)  | MetaboChip |
|          |         | Controls | 586 (235/351)   | 58.6 (14.1) |             | 5.2 (0.4) | 26.7 (4.4)  |            |
| STR      | Sweden  | Cases    | 286 (137/149)   | 75.2 (8.4)  | N/A         | 8.1 (4.3) | 26.5 (4.3)  | MetaboChip |
|          |         | Controls | 1,301 (549/752) | 76.4 (9.6)  |             | 5.4 (0.6) | 24.7 (3.8)  |            |
| Leipzig  | Germany | Cases    | 200 (88/112)    | 52.5 (13.0) | N/A         | N/A       | 45.0 (11.7) | MetaboChip |
|          |         | Controls | 701 (283/418)   | 40.9 (16.6) |             | N/A       | 34.2 (11.4) |            |
| ULSAM    | Sweden  | Cases    | 166 (166/0)     | 71.0 (0.6)  | N/A         | N/A       | 27.7 (3.8)  | MetaboChip |
|          |         | Controls | 953 (953/0)     | 71.0 (0.6)  |             | N/A       | 25.9 (3.2)  |            |
| PIVUS    | Sweden  | Cases    | 111 (65/46)     | 70.2 (0.2)  | N/A         | N/A       | 29.5 (5.1)  | MetaboChip |
|          |         | Controls | 838 (409/429)   | 70.2 (0.2)  |             | N/A       | 26.8 (4.2)  |            |
| DRsEXTRA | Finland | Cases    | 101 (50/51)     | 68.0 (5.8)  | N/A         | 6.7 (0.8) | 30.8 (5.6)  | MetaboChip |
|          |         | Controls | 762 (331/431)   | 66.0 (5.3)  |             | 5.4 (0.4) | 26.7 (4.0)  |            |

### (b) Validation meta-analysis

| Study           | Country of origin                                      | T2D status | Sample characteristics      |                       |                                    |                                    |                                    | Genotyping array                     |
|-----------------|--------------------------------------------------------|------------|-----------------------------|-----------------------|------------------------------------|------------------------------------|------------------------------------|--------------------------------------|
|                 |                                                        |            | Sample size (males/females) | Age (years) mean (SD) | Age of diagnosis (years) mean (SD) | Fasting glucose (mmol/l) mean (SD) | BMI (kg/m <sup>2</sup> ) mean (SD) |                                      |
| deCODE          | Iceland                                                | Cases      | 7,249 (3,892/3,357)         | 63.4 (15.3)           | N/A                                | N/A                                | 30.7 (6.0)                         | Illumina (various)                   |
|                 |                                                        | Controls   | 83,049 (35,946/47,103)      | 51.5 (18.7)           |                                    | N/A                                | 26.5 (4.9)                         |                                      |
| InterACT-GWAS   | France, Germany, Italy, Netherlands, Spain, Sweden, UK | Cases      | 4,624 (2,229/2,395)         | N/A                   | N/A                                | N/A                                | 30.0 (4.8)                         | Illumina HumanHap 660                |
|                 |                                                        | Controls   | 4,668 (1,673/2,995)         | N/A                   |                                    | N/A                                | 25.9 (4.2)                         |                                      |
| WTCCC           | UK                                                     | Cases      | 1,924 (1,118/806)           | 58.6 (9.2)            | 50.3 (9.2)                         | N/A                                | 30.7 (6.1)                         | Affymetrix GeneChip 500K             |
|                 |                                                        | Controls   | 2,938 (1,446/1,492)         | N/A                   |                                    | N/A                                | N/A                                |                                      |
| NHS             | USA                                                    | Cases      | 1,467 (0/1,467)             | 53.4 (6.7)            | N/A                                | N/A                                | 27.4 (5.0)                         | Affymetrix 6.0                       |
|                 |                                                        | Controls   | 1,754 (0/1,754)             | 53.2 (6.7)            |                                    | N/A                                | 23.5 (3.9)                         |                                      |
| ARIC            | USA                                                    | Cases      | 755 (408/347)               | 56.1 (5.6)            | N/A                                | N/A                                | 30.4 (5.5)                         | Affymetrix 6.0                       |
|                 |                                                        | Controls   | 7,009 (3,098/3,911)         | 54.0 (5.7)            |                                    | N/A                                | 26.4 (4.5)                         |                                      |
| FHS             | USA                                                    | Cases      | 673 (386/287)               | 63.7 (12.4)           | N/A                                | 8.6 (2.8)                          | 31.4 (6.5)                         | Affymetrix GeneChip 500K<br>MIPS 50K |
|                 |                                                        | Controls   | 7,660 (3,441/4,219)         | 52.3 (16.0)           |                                    | 5.3 (0.5)                          | 27.0 (5.1)                         |                                      |
| HPFS            | USA                                                    | Cases      | 1,124 (1,124/0)             | 55.6 (8.6)            | N/A                                | N/A                                | 27.8 (4.0)                         | Affymetrix 6.0                       |
|                 |                                                        | Controls   | 1,298 (1,298/0)             | 55.5 (8.4)            |                                    | N/A                                | 25.0 (2.7)                         |                                      |
| Rotterdam Study | Netherlands                                            | Cases      | 654                         | N/A                   | N/A                                | N/A                                | N/A                                | Illumina Human 550K                  |
|                 |                                                        | Controls   | 5,219                       | N/A                   |                                    | N/A                                | N/A                                |                                      |
| FUSION          | Finland                                                | Cases      | 1,060                       | N/A                   | N/A                                | N/A                                | N/A                                | Illumina HumanHap 300                |
|                 |                                                        | Controls   | 1,090                       | N/A                   |                                    | N/A                                | N/A                                |                                      |
| BioMe-Illumina  | USA                                                    | Cases      | 255 (181/74)                | 69.1 (9.0)            | N/A                                | N/A                                | 30.7 (6.2)                         | Illumina OMNI-ExpressExome           |
|                 |                                                        | Controls   | 1,647 (801/846)             | 67.6 (9.4)            |                                    | 5.1 (1.0)                          | 26.3 (5.0)                         |                                      |
| BioMe-Affy      | USA                                                    | Cases      | 132 (97/35)                 | 66.0 (10.7)           | N/A                                | N/A                                | 31.3 (6.3)                         | Affymetrix 6.0                       |
|                 |                                                        | Controls   | 455 (297/158)               | 59.4 (16.0)           |                                    | 5.1 (1.1)                          | 26.5 (5.2)                         |                                      |

**Supplementary Table 2. Summary of study-specific quality control, imputation and analysis.**

**(a) Metabochip meta-analysis**

| Study        | Sample QC |                               | Variant QC |                       |       | Imputation   |          |               | Association analysis |          |                                      |                |
|--------------|-----------|-------------------------------|------------|-----------------------|-------|--------------|----------|---------------|----------------------|----------|--------------------------------------|----------------|
|              | Call rate | Exclusions                    | Call rate  | HWE                   | MAF   | QC+ variants | Software | Quality       | QC+ variants         | Software | Covariates (if any)                  | $\lambda_{GT}$ |
| InterACT-CMC | ≥0.97     | IBD check and ethnic outliers | ≥0.95      | $p>10^{-4}$           | ≥0.01 | 113,924      | IMPUTEv2 | info≥0.4      | 341,751              | SNPTEST  | 3 PCs                                | 1.01           |
| PMB          | ≥0.95     | IBD check and ethnic outliers | ≥0.95      | $p>10^{-6}$           | ≥0.01 | 114,574      | IMPUTEv2 | info≥0.4      | 274,571              | SNPTEST  | Sex, 10 PCs                          | 1.07           |
| GoDARTS      | ≥0.95     | IBD check and ethnic outliers | ≥0.95      | $p>5.7\times 10^{-7}$ | ≥0.01 | 115,548      | IMPUTEv2 | info≥0.4      | 289,250              | SNPTEST  | 3 PCs                                | 1.07           |
| DANISH       | ≥0.90     | IBD check and ethnic outliers | ≥0.95      | $p>10^{-4}$           | ≥0.01 | 118,622      | IMPUTEv2 | info≥0.4      | 294,141              | SNPTEST  |                                      | 1.03           |
| DGDG         | ≥0.90     | IBD check and ethnic outliers | ≥0.95      | $p>10^{-4}$           | ≥0.01 | 119,227      | IMPUTEv2 | info≥0.4      | 270,645              | SNPTEST  | Age, Sex, BMI, 2 PCs                 | 1.13           |
| KORA         | ≥0.95     | IBD check                     | ≥0.95      | $p>10^{-6}$           | ≥0.01 | 115,784      | IMPUTEv2 | info≥0.4      | 279,527              | SNPTEST  | Age, Sex                             | 1.05           |
| Warren2/58BC | ≥0.95     | IBD check and ethnic outliers | ≥0.95      | $p>10^{-6}$           | ≥0.01 | 115,043      | IMPUTEv2 | info≥0.4      | 284,944              | SNPTEST  |                                      | 1.07           |
| IMPROVE      | ≥0.95     | IBD check and ethnic outliers | ≥0.95      | $p>10^{-6}$           | ≥0.01 | 105,663      | minimac  | $r^2\geq 0.3$ | 212,360              | mach2dat | Age, Sex, 3 PCs                      | 1.12           |
| HUNT/TROMSO  | ≥0.98     | IBD check                     | ≥0.98      | $p>10^{-5}$           | ≥0.01 | 119,658      | minimac  | $r^2\geq 0.3$ | 198,043              | mach2dat | Age, Study origin                    | 1.08           |
| FUSION2      | ≥0.98     | IBD check                     | ≥0.98      | $p>10^{-5}$           | ≥0.01 | 116,942      | minimac  | $r^2\geq 0.3$ | 190,480              | mach2dat | Age, Place of birth                  | 0.97           |
| EMIL-Ulm     | ≥0.95     | IBD check                     | ≥0.95      | $p>10^{-6}$           | ≥0.01 | 116,795      | IMPUTEv2 | info≥0.4      | 251,219              | SNPTEST  | Age, Sex, 10 PCs                     | 1.13           |
| DILGOM       | ≥0.95     | IBD check                     | ≥0.95      | $p>10^{-6}$           | ≥0.01 | 115,398      | IMPUTEv2 | info≥0.4      | 234,196              | SNPTEST  | Sex                                  | 0.97           |
| HNR          | ≥0.97     | IBD check and ethnic outliers | ≥0.95      | $p>10^{-4}$           | ≥0.01 | 120,219      | IMPUTEv2 | info≥0.4      | 269,933              | SNPTEST  | Age, Sex                             | 0.99           |
| EGCUT        | ≥0.95     | IBD check and ethnic outliers | ≥0.95      | $p>10^{-6}$           | ≥0.01 | 115,469      | IMPUTEv2 | info≥0.4      | 221,762              | SNPTEST  | Age, Sex                             | 1.02           |
| METSIM       | ≥0.98     | IBD check                     | ≥0.98      | $p>10^{-5}$           | ≥0.01 | 116,075      | minimac  | $r^2\geq 0.3$ | 183,195              | mach2dat | Age                                  | 1.02           |
| D2D2007      | ≥0.98     | IBD check                     | ≥0.98      | $p>10^{-5}$           | ≥0.01 | 116,585      | minimac  | $r^2\geq 0.3$ | 184,582              | mach2dat | Age                                  | 0.99           |
| SCARFSHEEP   | ≥0.95     | IBD check                     | ≥0.95      | $p>10^{-6}$           | ≥0.01 | 106,723      | minimac  | $r^2\geq 0.3$ | 187,784              | mach2dat | Age, Sex, Cohort, CAD, Swedish birth | 0.98           |
| DIAGEN       | ≥0.98     | IBD check                     | ≥0.98      | $p>10^{-5}$           | ≥0.01 | 119,267      | minimac  | $r^2\geq 0.3$ | 184,830              | mach2dat | Age                                  | 1.07           |
| STR          | ≥0.95     | IBD check                     | ≥0.95      | $p>10^{-4}$           | ≥0.01 | 115,246      | IMPUTEv2 | info≥0.4      | 220,186              | SNPTEST  | Age, Sex                             | 1.09           |
| Leipzig      | ≥0.95     | IBD check and ethnic outliers | ≥0.95      | $p>5.7\times 10^{-7}$ | ≥0.01 | 116,954      | IMPUTEv2 | info≥0.4      | 212,700              | SNPTEST  | Age                                  | 1.03           |
| ULSAM        | ≥0.95     | IBD check and ethnic outliers | ≥0.98      | $p>10^{-4}$           | ≥0.01 | 113,580      | IMPUTEv2 | info≥0.4      | 209,549              | SNPTEST  | 2 PCs                                | 0.97           |
| PIVUS        | ≥0.95     | IBD check and ethnic outliers | ≥0.95      | $p>10^{-6}$           | ≥0.01 | 117,487      | IMPUTEv2 | info≥0.4      | 204,014              | SNPTEST  | Age, Sex, 2 PCs                      | 0.97           |
| DR-extra     | ≥0.98     | IBD check                     | ≥0.98      | $p>10^{-5}$           | ≥0.01 | 115,865      | minimac  | $r^2\geq 0.3$ | 161,772              | mach2dat | Age                                  | 1.03           |

**(b) Validation meta-analysis**

| Study         | Sample QC |                               | Variant QC |                       |       | Imputation   |          |               | Association analysis |           |                              |                |
|---------------|-----------|-------------------------------|------------|-----------------------|-------|--------------|----------|---------------|----------------------|-----------|------------------------------|----------------|
|               | Call rate | Exclusions                    | Call rate  | HWE                   | MAF   | QC+ variants | Software | Quality       | QC+ variants         | Software  | Covariates (if any)          | $\lambda_{GC}$ |
| deCODE        | ≥0.97     | Ethnic outliers               | ≥0.95      | $p>10^{-6}$           | ≥0.01 | 699,107      | In-house | info≥0.4      | <i>in silico</i>     | SNPTEST   | Age, Sex                     | 1.30           |
| InterACT-GWAS | ≥0.98     | IBD check and ethnic outliers | ≥0.95      | $p>5.7\times 10^{-7}$ | ≥0.01 | 541,471      | IMPUTEv2 | info≥0.4      | <i>in silico</i>     | SNPTEST   | Sex, 10 PCs                  | 0.98           |
| WTCCC         | ≥0.97     | IBD check and ethnic outliers | ≥0.95      | $p>10^{-3}$           | ≥0.01 | N/A          | IMPUTEv2 | info≥0.4      | <i>in silico</i>     | SNPTEST   |                              | 1.00           |
| NHS           | ≥0.97     | IBD check and ethnic outliers | ≥0.97      | $p>10^{-6}$           | ≥0.01 | 606,626      | MACH     | $r^2\geq 0.3$ | <i>in silico</i>     | SNPTEST   |                              | 1.01           |
| ARIC          | ≥0.95     | IBD check and ethnic outliers | ≥0.95      | $p>10^{-5}$           | ≥0.01 | 695,783      | IMPUTEv2 | info≥0.4      | <i>in silico</i>     | SNPTEST   | Age, Sex, Study Centre, 1 PC | 1.01           |
| FHS           | ≥0.97     | Mendelian errors              | ≥0.95      | $p>10^{-6}$           | ≥0.01 | 412,053      | minimac  | $r^2\geq 0.3$ | <i>in silico</i>     | R geepack | Age, Sex, Cohort, 10 PCs     | 1.03           |
| HPFS          | ≥0.97     | IBD check and ethnic outliers | ≥0.97      | $p>10^{-6}$           | ≥0.01 | 607,569      | MACH     | $r^2\geq 0.3$ | <i>in silico</i>     | SNPTEST   |                              | 1.01           |

|                 |        |                               |       |                     |       |         |         |               |                  |          |                 |      |
|-----------------|--------|-------------------------------|-------|---------------------|-------|---------|---------|---------------|------------------|----------|-----------------|------|
| Rotterdam Study | ≥0.975 | IBD check                     | ≥0.98 | $p>10^{-6}$         | ≥0.01 | N/A     | minimac | $r^2\geq 0.3$ | <i>in silico</i> | mach2dat |                 | 1.02 |
| FUSION          | ≥0.95  | IBD check                     | ≥0.95 | $p>10^{-6}$         | ≥0.01 | N/A     | minimac | $r^2\geq 0.3$ | <i>in silico</i> | mach2dat |                 | 1.00 |
| BioMe-Illumina  | ≥0.98  | IBD check and ethnic outliers | ≥0.95 | $p>5\times 10^{-5}$ | ≥0.01 | 845,969 | IMPUTE  | info≥0.4      | <i>in silico</i> | SNPTEST  | Age, Sex, 4 PCs | 1.01 |
| BioMe-Affy      | ≥0.95  | IBD check and ethnic outliers | ≥0.95 | $p>10^{-4}$         | ≥0.01 | 683,891 | IMPUTE  | info≥0.4      | <i>in silico</i> | SNPTEST  | Age, Sex, 5 PCs | 1.01 |

PCs: principal components. BMI: body-mass index. CAD: coronary artery disease status (case-control).

**Supplementary Table 3. Summary of fine-mapping regions on Metabochip that overlap established T2D susceptibility loci.**

| Locus              | Chr | Fine-mapping region (b37) |               | Selected trait(s) | Priority <sup>b</sup> | Previously reported lead SNP in European ancestry populations |                |                        |                  |                                                                                      |
|--------------------|-----|---------------------------|---------------|-------------------|-----------------------|---------------------------------------------------------------|----------------|------------------------|------------------|--------------------------------------------------------------------------------------|
|                    |     | Start position            | Stop position |                   |                       | SNP                                                           | Position (b37) | p-value                | OR (95% CI)      | Reference(s)                                                                         |
| <i>NOTCH2</i>      | 1   | 120,437,717               | 120,615,600   | T2D               | S                     | rs10923931                                                    | 120,517,959    | 0.00061                | 1.07 (1.03-1.12) | Voight <i>et al.</i> (2010) <sup>4</sup> ; Morris <i>et al.</i> (2012) <sup>5</sup>  |
| <i>PROX1</i>       | 1   | 214,124,817               | 214,167,508   | FG                | G                     | rs2075423                                                     | 214,154,719    | 1.9x10 <sup>-7</sup>   | 1.07 (1.04-1.10) | Morris <i>et al.</i> (2012) <sup>5</sup>                                             |
| <i>GCKR</i>        | 2   | 27,386,798                | 28,670,981    | TG/FG             | G/B                   | rs780094                                                      | 27,741,237     | 8.5x10 <sup>-10</sup>  | 1.08 (1.06-1.11) | Dupuis <i>et al.</i> (2010) <sup>20</sup> ; Morris <i>et al.</i> (2012) <sup>5</sup> |
| <i>THADA</i>       | 2   | 43,449,384                | 43,893,878    | T2D               | B                     | rs10203174                                                    | 43,690,030     | 1.0x10 <sup>-9</sup>   | 1.14 (1.09-1.19) | Morris <i>et al.</i> (2012) <sup>5</sup>                                             |
| <i>BCL11A</i>      | 2   | 60,557,030                | 60,601,376    | T2D               | B                     | rs243088                                                      | 60,568,745     | 6.5x10 <sup>-6</sup>   | 1.06 (1.03-1.09) | Morris <i>et al.</i> (2012) <sup>5</sup>                                             |
| <i>GRB14-COBL1</i> | 2   | 165,499,547               | 165,732,418   | HDL/WHR           | G/B                   | rs13389219                                                    | 165,528,876    | 1.2x10 <sup>-13</sup>  | 1.10 (1.07-1.13) | Morris <i>et al.</i> (2012) <sup>5</sup>                                             |
| <i>IRS1</i>        | 2   | 227,007,409               | 227,190,673   | T2D               | G                     | rs2943640                                                     | 227,093,585    | 1.1x10 <sup>-14</sup>  | 1.11 (1.08-1.14) | Morris <i>et al.</i> (2012) <sup>5</sup>                                             |
| <i>PPARG</i>       | 3   | 12,207,460                | 12,470,239    | T2D               | B                     | rs1801282                                                     | 12,393,125     | 8.0x10 <sup>-8</sup>   | 1.11 (1.07-1.15) | Morris <i>et al.</i> (2012) <sup>5</sup>                                             |
| <i>ADAMTS9</i>     | 3   | 64,691,378                | 64,733,440    | T2D               | S                     | rs6795735                                                     | 64,705,365     | 1.3x10 <sup>-7</sup>   | 1.07 (1.04-1.10) | Voight <i>et al.</i> (2010) <sup>4</sup> ; Morris <i>et al.</i> (2012) <sup>5</sup>  |
| <i>ADCY5</i>       | 3   | 122,976,417               | 123,207,012   | FG/T2D            | G                     | rs11717195                                                    | 123,082,398    | 3.4x10 <sup>-13</sup>  | 1.12 (1.09-1.15) | Morris <i>et al.</i> (2012) <sup>5</sup>                                             |
| <i>IGF2BP2</i>     | 3   | 185,337,787               | 185,596,778   | T2D               | G/S                   | rs4402960                                                     | 185,511,687    | 1.8x10 <sup>-19</sup>  | 1.13 (1.10-1.16) | Morris <i>et al.</i> (2012) <sup>5</sup>                                             |
| <i>WFS1</i>        | 4   | 6,262,591                 | 6,336,127     | T2D               | G                     | rs4458523                                                     | 6,289,986      | 2.0x10 <sup>-10</sup>  | 1.09 (1.06-1.11) | Morris <i>et al.</i> (2012) <sup>5</sup>                                             |
| <i>ZBED3</i>       | 5   | 76,420,789                | 76,437,700    | T2D               | S                     | rs6878122                                                     | 76,427,311     | 6.6x10 <sup>-10</sup>  | 1.09 (1.06-1.12) | Morris <i>et al.</i> (2012) <sup>5</sup>                                             |
| <i>CDKAL1</i>      | 6   | 20,393,906                | 21,191,928    | T2D               | G/S                   | rs7756992                                                     | 20,679,709     | 3.2x10 <sup>-22</sup>  | 1.14 (1.11-1.18) | Morris <i>et al.</i> (2012) <sup>5</sup>                                             |
| <i>DGKB</i>        | 7   | 14,185,087                | 15,145,681    | FG                | G/S                   | rs17168486                                                    | 14,898,282     | 0.000024               | 1.07 (1.04-1.11) | Morris <i>et al.</i> (2012) <sup>5</sup>                                             |
| <i>JAZF1</i>       | 7   | 27,783,994                | 28,282,062    | T2D               | G/S                   | rs849135                                                      | 28,196,413     | 5.0x10 <sup>-12</sup>  | 1.09 (1.07-1.12) | Morris <i>et al.</i> (2012) <sup>5</sup>                                             |
| <i>GCK</i>         | 7   | 44,222,002                | 44,266,077    | FG/HbA1c          | S/B                   | rs10278336                                                    | 44,245,363     | 9.6x10 <sup>-7</sup>   | 1.07 (1.04-1.09) | Morris <i>et al.</i> (2012) <sup>5</sup>                                             |
| <i>KLF14</i>       | 7   | 130,421,158               | 130,468,190   | T2D/HDL           | S/B                   | rs13233731                                                    | 13,0437,689    | 0.19                   | 1.02 (0.99-1.04) | Morris <i>et al.</i> (2012) <sup>5</sup>                                             |
| <i>SLC30A8</i>     | 8   | 118,182,117               | 118,223,955   | T2D               | B                     | rs3802177                                                     | 11,8185,025    | 1.4x10 <sup>-18</sup>  | 1.13 (1.10-1.16) | Voight <i>et al.</i> (2010) <sup>4</sup> ; Morris <i>et al.</i> (2012) <sup>5</sup>  |
| <i>GLIS3</i>       | 9   | 4,243,161                 | 4,310,558     | FG                | G                     | rs10758593                                                    | 4,292,083      | 1.1x10 <sup>-6</sup>   | 1.06 (1.04-1.09) | Morris <i>et al.</i> (2012) <sup>5</sup>                                             |
| <i>CDKN2A-B</i>    | 9   | 21,950,408                | 22,159,982    | T2D/MICAD         | G/S                   | rs10811661                                                    | 22,134,094     | 1.1x10 <sup>-27</sup>  | 1.21 (1.17-1.25) | Morris <i>et al.</i> (2012) <sup>5</sup>                                             |
| <i>CDC123</i>      | 10  | 12,160,444                | 12,338,626    | T2D               | G                     | rs11257655                                                    | 12,307,894     | 3.9x10 <sup>-10</sup>  | 1.10 (1.07-1.13) | Morris <i>et al.</i> (2012) <sup>5</sup>                                             |
| <i>HHEX-IDE</i>    | 10  | 94,200,768                | 94,498,975    | T2D               | G                     | rs1111875                                                     | 94,462,882     | 3.0x10 <sup>-14</sup>  | 1.10 (1.08-1.13) | Morris <i>et al.</i> (2012) <sup>5</sup>                                             |
| <i>TCF7L2</i>      | 10  | 114,746,579               | 114,822,739   | T2D               | G                     | rs7903146                                                     | 114,758,349    | 5.8x10 <sup>-120</sup> | 1.39 (1.35-1.43) | Voight <i>et al.</i> (2010) <sup>4</sup> ; Morris <i>et al.</i> (2012) <sup>5</sup>  |
| <i>KCNQ1</i>       | 11  | 2,443,937                 | 2,943,115     | T2D/QT            | G/S                   | rs163184                                                      | 2,847,069      | 9.5x10 <sup>-18</sup>  | 1.12 (1.09-1.14) | Morris <i>et al.</i> (2012) <sup>5</sup>                                             |
| <i>KCNJ11</i>      | 11  | 17,038,776                | 17,424,926    | T2D               | B                     | rs5215                                                        | 17,408,630     | 1.5x10 <sup>-10</sup>  | 1.09 (1.06-1.12) | Voight <i>et al.</i> (2010) <sup>4</sup> ; Morris <i>et al.</i> (2012) <sup>5</sup>  |
| <i>CENTD2</i>      | 11  | 72,391,642                | 72,880,613    | T2D               | B                     | rs1552224                                                     | 72,433,098     | 3.7x10 <sup>-7</sup>   | 1.09 (1.05-1.13) | Voight <i>et al.</i> (2010) <sup>4</sup> ; Morris <i>et al.</i> (2012) <sup>5</sup>  |
| <i>MTNR1B</i>      | 11  | 92,667,046                | 92,725,521    | FG/HbA1c/T2D      | G/S/B                 | rs10830963                                                    | 92,708,710     | 2.9x10 <sup>-12</sup>  | 1.10 (1.07-1.13) | Morris <i>et al.</i> (2012) <sup>5</sup>                                             |
| <i>HMG2</i>        | 12  | 66,164,516                | 66,303,735    | T2D               | G                     | rs2261181                                                     | 66,212,318     | 1.3x10 <sup>-8</sup>   | 1.13 (1.09-1.18) | Morris <i>et al.</i> (2012) <sup>5</sup>                                             |
| <i>TSPAN8</i>      | 12  | 71,543,070                | 71,667,022    | T2D               | G                     | rs4760790                                                     | 71,634,794     | 7.4x10 <sup>-6</sup>   | 1.07 (1.04-1.10) | Voight <i>et al.</i> (2010) <sup>4</sup> ; Morris <i>et al.</i> (2012) <sup>5</sup>  |
| <i>HNF1A</i>       | 12  | 121,157,534               | 121,490,565   | T2D/MICAD/LDL     | G/S                   | rs12427353                                                    | 121,426,901    | 0.00016                | 1.06 (1.03-1.10) | Morris <i>et al.</i> (2012) <sup>5</sup>                                             |
| <i>C2CD4A-B</i>    | 15  | 62,098,986                | 62,520,663    | FG/2hG            | S/B                   | rs4502156                                                     | 62,383,155     | 0.0018                 | 1.04 (1.02-1.07) | Morris <i>et al.</i> (2012) <sup>5</sup>                                             |
| <i>PRC1</i>        | 15  | 91,441,382                | 91,566,862    | T2D               | B                     | rs12899811                                                    | 91,544,076     | 3.1x10 <sup>-6</sup>   | 1.07 (1.04-1.09) | Morris <i>et al.</i> (2012) <sup>5</sup>                                             |

|              |    |            |            |     |     |                        |            |                       |                  |                                                                                     |
|--------------|----|------------|------------|-----|-----|------------------------|------------|-----------------------|------------------|-------------------------------------------------------------------------------------|
| <i>FTO</i>   | 16 | 53,539,508 | 54,185,787 | BMI | G/S | rs9936385              | 53,819,169 | 9.9x10 <sup>-24</sup> | 1.14 (1.11-1.17) | Morris <i>et al.</i> (2012) <sup>5</sup>                                            |
| <i>HNF1B</i> | 17 | 36,090,544 | 36,108,367 | T2D | G   | rs11651052             | 36,102,381 | 1.0x10 <sup>-11</sup> | 1.09 (1.06-1.12) | Morris <i>et al.</i> (2012) <sup>5</sup>                                            |
| <i>MC4R</i>  | 18 | 57,727,146 | 58,094,636 | BMI | G/S | rs12970134             | 57,884,750 | 0.0019                | 1.05 (1.02-1.08) | Morris <i>et al.</i> (2012) <sup>5</sup>                                            |
| <i>CILP2</i> | 19 | 19,301,231 | 19,792,250 | LDL | G   | rs10401969             | 19,407,718 | 2.5x10 <sup>-11</sup> | 1.17 (1.12-1.22) | Morris <i>et al.</i> (2012) <sup>5</sup>                                            |
| <i>GIPR</i>  | 19 | 46,136,486 | 46,408,041 | 2hG | G/S | rs8108269              | 46,158,513 | 7.1x10 <sup>-8</sup>  | 1.08 (1.05-1.11) | Morris <i>et al.</i> (2012) <sup>5</sup>                                            |
| <i>HNF4A</i> | 20 | 43,038,558 | 43,058,096 | HDL | S   | rs4812829 <sup>a</sup> | 42,989,267 | N/A                   | N/A              | Kooner <i>et al.</i> (2011) <sup>2</sup> ; Morris <i>et al.</i> (2012) <sup>5</sup> |

Association summary statistics are based on the meta-analysis of Metabochip studies in 27,206 cases and 57,574 controls of European ancestry.

Chr: chromosome. RAF: risk allele frequency. OR: odds-ratio for risk allele. CI: confidence interval.

T2D: type 2 diabetes. FG: fasting glucose. TG: triglycerides. HDL: high-density lipoprotein cholesterol. WHR: waist-hip ratio. HbA1c: haemoglobin A1c. MICAD: myocardial infarction and/or coronary artery disease. QT: QT interval. LDL: low-density lipoprotein cholesterol. 2hG: two-hour glucose. BMI: body-mass index.

<sup>a</sup>The previously reported lead SNP for T2D at the *HNF4A* locus maps outside the fine-mapping region.

<sup>b</sup>Priority for fine-mapping classified as: gold (G); silver (S); or bronze (B).

**Supplementary Table 4. Imputation quality metrics across MetaboChip fine-mapping regions.**

| Study        | Sample size<br>(cases/controls) | Imputation<br>software | High-quality <sup>a</sup> imputed variants amongst those polymorphic in European ancestry haplotypes<br>from the 1000 Genomes Project Consortium phase 1 integrated reference panel |                                  |                             |                                  |                    |                                  |
|--------------|---------------------------------|------------------------|-------------------------------------------------------------------------------------------------------------------------------------------------------------------------------------|----------------------------------|-----------------------------|----------------------------------|--------------------|----------------------------------|
|              |                                 |                        | Common (MAF≥5%)                                                                                                                                                                     |                                  | Low-frequency (0.5%≤MAF<5%) |                                  | Rare (0%<MAF<0.5%) |                                  |
|              |                                 |                        | N (%)                                                                                                                                                                               | Mean info/ <i>r</i> <sup>2</sup> | N (%)                       | Mean info/ <i>r</i> <sup>2</sup> | N (%)              | Mean info/ <i>r</i> <sup>2</sup> |
| InterACT-CMC | 9,440 (3,553/5,887)             | IMPUTEv2               | 94,815 (99.9)                                                                                                                                                                       | 0.977                            | 65,583 (97.3)               | 0.855                            | 67,658 (68.5)      | 0.696                            |
| DANISH       | 8,495 (1,892/6,603)             | IMPUTEv2               | 94,829 (99.9)                                                                                                                                                                       | 0.979                            | 65,028 (96.5)               | 0.862                            | 60,265 (61.0)      | 0.705                            |
| PMB          | 8,476 (4,976/3,500)             | IMPUTEv2               | 94,858 (99.9)                                                                                                                                                                       | 0.979                            | 65,124 (96.6)               | 0.866                            | 57,233 (57.9)      | 0.700                            |
| GoDARTS      | 7,006 (3,298/3,708)             | IMPUTEv2               | 94,805 (99.9)                                                                                                                                                                       | 0.978                            | 64,540 (95.8)               | 0.858                            | 59,179 (59.9)      | 0.695                            |
| KORA         | 6,880 (1,207/5,673)             | IMPUTEv2               | 93,395 (98.4)                                                                                                                                                                       | 0.975                            | 61,082 (90.6)               | 0.859                            | 52,822 (53.5)      | 0.717                            |
| Warren2/58BC | 5,341 (1,117/4,224)             | IMPUTEv2               | 94,803 (99.9)                                                                                                                                                                       | 0.978                            | 64,468 (95.7)               | 0.859                            | 58,735 (59.5)      | 0.708                            |
| DGDG         | 5,207 (2,019/3,188)             | IMPUTEv2               | 94,621 (99.7)                                                                                                                                                                       | 0.975                            | 61,791 (91.7)               | 0.853                            | 44,930 (45.5)      | 0.742                            |
| HNR          | 4,452 (520/3,932)               | IMPUTEv2               | 94,845 (99.9)                                                                                                                                                                       | 0.979                            | 64,217 (95.3)               | 0.866                            | 56,157 (56.9)      | 0.734                            |
| DILGOM       | 3,898 (541/3,357)               | IMPUTEv2               | 94,860 (99.9)                                                                                                                                                                       | 0.981                            | 62,650 (93.0)               | 0.877                            | 41,514 (42.0)      | 0.764                            |
| IMPROVE      | 3,429 (904/2,525)               | minimac                | 93,658 (98.7)                                                                                                                                                                       | 0.965                            | 58,507 (86.8)               | 0.836                            | 32,898 (33.3)      | 0.684                            |
| SCARFSHEEP   | 3,220 (314/2,906)               | minimac                | 93,804 (98.8)                                                                                                                                                                       | 0.969                            | 57,808 (85.8)               | 0.841                            | 24,974 (25.3)      | 0.668                            |
| HUNT/TROMSO  | 2,614 (1,239/1,375)             | minimac                | 94,189 (99.2)                                                                                                                                                                       | 0.973                            | 60,490 (89.8)               | 0.846                            | 30,595 (31.0)      | 0.690                            |
| EMIL-Ulm     | 2,387 (755/1,632)               | IMPUTEv2               | 94,778 (99.9)                                                                                                                                                                       | 0.978                            | 64,137 (95.2)               | 0.858                            | 51,078 (51.7)      | 0.717                            |
| FUSION2      | 2,191 (1,037/1,154)             | minimac                | 94,449 (99.5)                                                                                                                                                                       | 0.977                            | 61,097 (90.7)               | 0.851                            | 27,786 (28.1)      | 0.698                            |
| METSIM       | 1,818 (1167/651)                | minimac                | 94,449 (99.5)                                                                                                                                                                       | 0.977                            | 59,419 (88.2)               | 0.853                            | 23,748 (24.0)      | 0.704                            |
| EGCUT        | 1,801 (912/889)                 | IMPUTEv2               | 94,846 (99.9)                                                                                                                                                                       | 0.979                            | 63,387 (94.1)               | 0.869                            | 39,403 (39.9)      | 0.739                            |
| D2D2007      | 1,683 (454/1,229)               | minimac                | 94,449 (99.5)                                                                                                                                                                       | 0.977                            | 59,753 (88.7)               | 0.852                            | 24,316 (24.6)      | 0.694                            |
| STR          | 1,587 (286/1,301)               | IMPUTEv2               | 94,800 (99.9)                                                                                                                                                                       | 0.979                            | 63,523 (94.3)               | 0.875                            | 40,729 (41.2)      | 0.755                            |
| ULSAM        | 1,119 (166/953)                 | IMPUTEv2               | 94,806 (99.9)                                                                                                                                                                       | 0.979                            | 62,597 (92.9)               | 0.881                            | 35,905 (36.4)      | 0.784                            |
| DIAGEN       | 1,023 (437/586)                 | minimac                | 94,005 (99.0)                                                                                                                                                                       | 0.972                            | 57,610 (85.5)               | 0.842                            | 24,377 (24.7)      | 0.691                            |
| PIVUS        | 949 (111/838)                   | IMPUTEv2               | 94,822 (99.9)                                                                                                                                                                       | 0.979                            | 62,122 (92.2)               | 0.888                            | 33,396 (33.8)      | 0.806                            |
| Leipzig      | 901 (200/701)                   | IMPUTEv2               | 94,767 (99.8)                                                                                                                                                                       | 0.977                            | 62,134 (92.2)               | 0.869                            | 35,949 (36.4)      | 0.760                            |
| DR-extra     | 863 (101/762)                   | minimac                | 94,404 (99.5)                                                                                                                                                                       | 0.977                            | 50,274 (74.6)               | 0.860                            | 14,471 (14.7)      | 0.724                            |

<sup>a</sup>High-quality variants defined by IMPUTEv2 info≥0.4 or minimac *r*<sup>2</sup>≥0.3.

**Supplementary Table 5. Imputation quality metrics in fine-mapping regions overlapping 39 established T2D susceptibility loci.**

(a) Common variants (MAF $\geq$ 5%)

| Locus              | Chr | Fine-mapping region (b37) |               | Priority <sup>a</sup> | Variants in European ancestry haplotypes from the 1000 Genomes Project Consortium phase 1 integrated reference panel |                           | High-quality <sup>b</sup> variants imputed into InterACT-CMC scaffold |           | High-quality <sup>b</sup> variants imputed into DANISH scaffold |           | High-quality <sup>b</sup> variants imputed into PMB scaffold |           | High-quality <sup>b</sup> variants imputed into GoDARTS scaffold |           |
|--------------------|-----|---------------------------|---------------|-----------------------|----------------------------------------------------------------------------------------------------------------------|---------------------------|-----------------------------------------------------------------------|-----------|-----------------------------------------------------------------|-----------|--------------------------------------------------------------|-----------|------------------------------------------------------------------|-----------|
|                    |     | Start position            | Stop position |                       | N                                                                                                                    | Typed on Metabochip N (%) | N (%)                                                                 | Mean info | N (%)                                                           | Mean info | N (%)                                                        | Mean info | N (%)                                                            | Mean info |
| <i>NOTCH2</i>      | 1   | 120,437,717               | 120,615,600   | S                     | 149                                                                                                                  | 74 (49.7)                 | 126 (84.6)                                                            | 0.837     | 143 (96.0)                                                      | 0.791     | 139 (93.3)                                                   | 0.802     | 135 (90.6)                                                       | 0.812     |
| <i>PROX1</i>       | 1   | 214,124,817               | 214,167,508   | G                     | 74                                                                                                                   | 45 (60.8)                 | 74 (100.0)                                                            | 0.966     | 74 (100.0)                                                      | 0.969     | 74 (100.0)                                                   | 0.968     | 74 (100.0)                                                       | 0.968     |
| <i>GCKR</i>        | 2   | 27,386,798                | 28,670,981    | G/B                   | 1,742                                                                                                                | 831 (47.7)                | 1,742 (100.0)                                                         | 0.982     | 1,742 (100.0)                                                   | 0.984     | 1,742 (100.0)                                                | 0.984     | 1,742 (100.0)                                                    | 0.983     |
| <i>THADA</i>       | 2   | 43,449,384                | 43,893,878    | B                     | 1,053                                                                                                                | 525 (49.9)                | 1,053 (100.0)                                                         | 0.989     | 1,053 (100.0)                                                   | 0.990     | 1,053 (100.0)                                                | 0.990     | 1,053 (100.0)                                                    | 0.990     |
| <i>BCL11A</i>      | 2   | 60,557,030                | 60,601,376    | B                     | 118                                                                                                                  | 75 (63.6)                 | 118 (100.0)                                                           | 0.993     | 118 (100.0)                                                     | 0.993     | 118 (100.0)                                                  | 0.994     | 118 (100.0)                                                      | 0.994     |
| <i>GRB14-COBL1</i> | 2   | 165,499,547               | 165,732,418   | G/B                   | 556                                                                                                                  | 212 (38.1)                | 556 (100.0)                                                           | 0.985     | 556 (100.0)                                                     | 0.986     | 555 (99.8)                                                   | 0.987     | 555 (99.8)                                                       | 0.988     |
| <i>IRS1</i>        | 2   | 227,007,409               | 227,190,673   | G                     | 313                                                                                                                  | 193 (61.7)                | 313 (100.0)                                                           | 0.982     | 313 (100.0)                                                     | 0.982     | 313 (100.0)                                                  | 0.983     | 313 (100.0)                                                      | 0.983     |
| <i>PPARG</i>       | 3   | 12,207,460                | 12,470,239    | B                     | 490                                                                                                                  | 178 (36.3)                | 490 (100.0)                                                           | 0.985     | 490 (100.0)                                                     | 0.986     | 489 (99.8)                                                   | 0.988     | 489 (99.8)                                                       | 0.987     |
| <i>ADAMTS9</i>     | 3   | 64,691,378                | 64,733,440    | S                     | 125                                                                                                                  | 84 (67.2)                 | 125 (100.0)                                                           | 0.988     | 125 (100.0)                                                     | 0.989     | 125 (100.0)                                                  | 0.989     | 125 (100.0)                                                      | 0.988     |
| <i>ADCY5</i>       | 3   | 122,976,417               | 123,207,012   | G                     | 424                                                                                                                  | 268 (63.2)                | 424 (100.0)                                                           | 0.977     | 424 (100.0)                                                     | 0.979     | 424 (100.0)                                                  | 0.980     | 424 (100.0)                                                      | 0.979     |
| <i>IGF2BP2</i>     | 3   | 185,337,787               | 185,596,778   | G/S                   | 367                                                                                                                  | 154 (42.0)                | 367 (100.0)                                                           | 0.971     | 367 (100.0)                                                     | 0.973     | 366 (99.7)                                                   | 0.974     | 366 (99.7)                                                       | 0.970     |
| <i>WFS1</i>        | 4   | 6,262,591                 | 6,336,127     | G                     | 281                                                                                                                  | 197 (70.1)                | 281 (100.0)                                                           | 0.978     | 281 (100.0)                                                     | 0.988     | 281 (100.0)                                                  | 0.983     | 281 (100.0)                                                      | 0.984     |
| <i>ZBED3</i>       | 5   | 76,420,789                | 76,437,700    | S                     | 34                                                                                                                   | 29 (85.3)                 | 34 (100.0)                                                            | 0.996     | 34 (100.0)                                                      | 0.997     | 34 (100.0)                                                   | 0.997     | 34 (100.0)                                                       | 0.996     |
| <i>CDKAL1</i>      | 6   | 20,393,906                | 21,191,928    | G/S                   | 2,109                                                                                                                | 1,021 (48.4)              | 2,108 (100.0)                                                         | 0.990     | 2,108 (100.0)                                                   | 0.991     | 2,109 (100.0)                                                | 0.991     | 2,108 (100.0)                                                    | 0.991     |
| <i>DGKB</i>        | 7   | 14,185,087                | 15,145,681    | G/S                   | 2,760                                                                                                                | 1,604 (58.1)              | 2,759 (100.0)                                                         | 0.984     | 2,759 (100.0)                                                   | 0.986     | 2,759 (100.0)                                                | 0.985     | 2,759 (100.0)                                                    | 0.985     |
| <i>JAZF1</i>       | 7   | 27,783,994                | 28,282,062    | G/S                   | 1,022                                                                                                                | 578 (56.6)                | 1,022 (100.0)                                                         | 0.986     | 1,022 (100.0)                                                   | 0.988     | 1,022 (100.0)                                                | 0.988     | 1,022 (100.0)                                                    | 0.987     |
| <i>GCK</i>         | 7   | 44,222,002                | 44,266,077    | S/B                   | 134                                                                                                                  | 71 (53.0)                 | 134 (100.0)                                                           | 0.986     | 134 (100.0)                                                     | 0.988     | 134 (100.0)                                                  | 0.990     | 134 (100.0)                                                      | 0.987     |
| <i>KLF14</i>       | 7   | 130,421,158               | 130,468,190   | S/B                   | 128                                                                                                                  | 61 (47.7)                 | 127 (99.2)                                                            | 0.990     | 127 (99.2)                                                      | 0.991     | 127 (99.2)                                                   | 0.991     | 127 (99.2)                                                       | 0.990     |
| <i>SLC30A8</i>     | 8   | 118,182,117               | 118,223,955   | B                     | 102                                                                                                                  | 42 (41.2)                 | 102 (100.0)                                                           | 0.977     | 102 (100.0)                                                     | 0.977     | 102 (100.0)                                                  | 0.977     | 102 (100.0)                                                      | 0.977     |
| <i>GLIS3</i>       | 9   | 4,243,161                 | 4,310,558     | G                     | 292                                                                                                                  | 180 (61.6)                | 292 (100.0)                                                           | 0.967     | 292 (100.0)                                                     | 0.971     | 292 (100.0)                                                  | 0.970     | 292 (100.0)                                                      | 0.970     |
| <i>CDKN2A-B</i>    | 9   | 21,950,408                | 22,159,982    | G/S                   | 432                                                                                                                  | 264 (61.1)                | 431 (99.8)                                                            | 0.971     | 431 (99.8)                                                      | 0.972     | 431 (99.8)                                                   | 0.973     | 431 (99.8)                                                       | 0.972     |
| <i>CDC123</i>      | 10  | 12,160,444                | 12,338,626    | G                     | 437                                                                                                                  | 182 (41.6)                | 437 (100.0)                                                           | 0.962     | 437 (100.0)                                                     | 0.966     | 437 (100.0)                                                  | 0.964     | 437 (100.0)                                                      | 0.962     |
| <i>HHEX-IDE</i>    | 10  | 94,200,768                | 94,498,975    | G                     | 490                                                                                                                  | 214 (43.7)                | 490 (100.0)                                                           | 0.981     | 490 (100.0)                                                     | 0.982     | 490 (100.0)                                                  | 0.982     | 490 (100.0)                                                      | 0.981     |
| <i>TCF7L2</i>      | 10  | 114,746,579               | 114,822,739   | G                     | 127                                                                                                                  | 81 (63.8)                 | 127 (100.0)                                                           | 0.993     | 127 (100.0)                                                     | 0.995     | 127 (100.0)                                                  | 0.994     | 127 (100.0)                                                      | 0.994     |
| <i>KCNQ1</i>       | 11  | 2,443,937                 | 2,943,115     | G/S                   | 1,244                                                                                                                | 786 (63.2)                | 1,244 (100.0)                                                         | 0.970     | 1,244 (100.0)                                                   | 0.982     | 1,244 (100.0)                                                | 0.982     | 1,244 (100.0)                                                    | 0.980     |
| <i>KCNJ11</i>      | 11  | 17,038,776                | 17,424,926    | B                     | 728                                                                                                                  | 247 (33.9)                | 728 (100.0)                                                           | 0.975     | 728 (100.0)                                                     | 0.978     | 728 (100.0)                                                  | 0.977     | 728 (100.0)                                                      | 0.977     |
| <i>CENTD2</i>      | 11  | 72,391,642                | 72,880,613    | B                     | 546                                                                                                                  | 180 (33.0)                | 546 (100.0)                                                           | 0.975     | 546 (100.0)                                                     | 0.977     | 546 (100.0)                                                  | 0.978     | 546 (100.0)                                                      | 0.977     |
| <i>MTNR1B</i>      | 11  | 92,667,046                | 92,725,521    | G/S/B                 | 110                                                                                                                  | 59 (53.6)                 | 110 (100.0)                                                           | 0.960     | 110 (100.0)                                                     | 0.961     | 110 (100.0)                                                  | 0.962     | 110 (100.0)                                                      | 0.961     |
| <i>HMGA2</i>       | 12  | 66,164,516                | 66,303,735    | G                     | 172                                                                                                                  | 26 (15.1)                 | 172 (100.0)                                                           | 0.982     | 172 (100.0)                                                     | 0.985     | 172 (100.0)                                                  | 0.983     | 172 (100.0)                                                      | 0.985     |
| <i>TSPAN8</i>      | 12  | 71,543,070                | 71,667,022    | G                     | 215                                                                                                                  | 83 (38.6)                 | 215 (100.0)                                                           | 0.985     | 215 (100.0)                                                     | 0.984     | 215 (100.0)                                                  | 0.982     | 215 (100.0)                                                      | 0.983     |
| <i>HNF1A</i>       | 12  | 121,157,534               | 121,490,565   | G/S                   | 948                                                                                                                  | 306 (32.3)                | 947 (99.9)                                                            | 0.966     | 947 (99.9)                                                      | 0.967     | 947 (99.9)                                                   | 0.968     | 947 (99.9)                                                       | 0.967     |
| <i>C2CD4A-B</i>    | 15  | 62,098,986                | 62,520,663    | S/B                   | 925                                                                                                                  | 311 (33.6)                | 925 (100.0)                                                           | 0.987     | 925 (100.0)                                                     | 0.988     | 925 (100.0)                                                  | 0.988     | 925 (100.0)                                                      | 0.988     |



|              |    |            |            |     |       |            |               |       |               |       |               |       |               |       |
|--------------|----|------------|------------|-----|-------|------------|---------------|-------|---------------|-------|---------------|-------|---------------|-------|
| <i>PRC1</i>  | 15 | 91,441,382 | 91,566,862 | B   | 367   | 153 (41.7) | 367 (100.0)   | 0.981 | 367 (100.0)   | 0.983 | 367 (100.0)   | 0.985 | 367 (100.0)   | 0.983 |
| <i>FTO</i>   | 16 | 53,539,508 | 54,185,787 | G/S | 1,446 | 724 (50.1) | 1,446 (100.0) | 0.984 | 1,446 (100.0) | 0.986 | 1,446 (100.0) | 0.986 | 1,446 (100.0) | 0.985 |
| <i>HNF1B</i> | 17 | 36,090,544 | 36,108,367 | G   | 42    | 22 (52.4)  | 42 (100.0)    | 0.960 | 42 (100.0)    | 0.963 | 42 (100.0)    | 0.964 | 42 (100.0)    | 0.963 |
| <i>MC4R</i>  | 18 | 57,727,146 | 58,094,636 | G/S | 679   | 409 (60.2) | 679 (100.0)   | 0.989 | 679 (100.0)   | 0.990 | 679 (100.0)   | 0.989 | 679 (100.0)   | 0.990 |
| <i>CILP2</i> | 19 | 19,301,231 | 19,792,250 | G   | 702   | 362 (51.6) | 702 (100.0)   | 0.983 | 702 (100.0)   | 0.984 | 702 (100.0)   | 0.985 | 702 (100.0)   | 0.985 |
| <i>GIPR</i>  | 19 | 46,136,486 | 46,408,041 | G/S | 745   | 240 (32.2) | 745 (100.0)   | 0.980 | 745 (100.0)   | 0.981 | 745 (100.0)   | 0.982 | 745 (100.0)   | 0.981 |
| <i>HNF4A</i> | 20 | 43,038,558 | 43,058,096 | S   | 58    | 31 (53.4)  | 58 (100.0)    | 0.990 | 58 (100.0)    | 0.990 | 58 (100.0)    | 0.992 | 58 (100.0)    | 0.990 |

(b) Low-frequency variants (0.5%≤MAF<5%)

| Locus              | Chr | Fine-mapping region (b37) |               | Priority <sup>a</sup> | Variants in European ancestry haplotypes from the 1000 Genomes Project Consortium phase 1 integrated reference panel |                         | High-quality <sup>b</sup> variants imputed into InterACT-CMC scaffold |           | High-quality <sup>b</sup> variants imputed into DANISH scaffold |           | High-quality <sup>b</sup> variants imputed into PMB scaffold |           | High-quality <sup>b</sup> variants imputed into GoDARTS scaffold |           |
|--------------------|-----|---------------------------|---------------|-----------------------|----------------------------------------------------------------------------------------------------------------------|-------------------------|-----------------------------------------------------------------------|-----------|-----------------------------------------------------------------|-----------|--------------------------------------------------------------|-----------|------------------------------------------------------------------|-----------|
|                    |     | Start position            | Stop position |                       | N                                                                                                                    | Typed on Metachip N (%) | N (%)                                                                 | Mean info | N (%)                                                           | Mean info | N (%)                                                        | Mean info | N (%)                                                            | Mean info |
| <i>NOTCH2</i>      | 1   | 120,437,717               | 120,615,600   | S                     | 145                                                                                                                  | 39 (26.9)               | 108 (74.5)                                                            | 0.809     | 106 (73.1)                                                      | 0.813     | 112 (77.2)                                                   | 0.785     | 105 (72.4)                                                       | 0.809     |
| <i>PROX1</i>       | 1   | 214,124,817               | 214,167,508   | G                     | 70                                                                                                                   | 30 (42.9)               | 68 (97.1)                                                             | 0.852     | 69 (98.6)                                                       | 0.845     | 70 (100.0)                                                   | 0.856     | 69 (98.6)                                                        | 0.844     |
| <i>GCKR</i>        | 2   | 27,386,798                | 28,670,981    | G/B                   | 1,862                                                                                                                | 373 (20.0)              | 1,837 (98.7)                                                          | 0.892     | 1,841 (98.9)                                                    | 0.896     | 1,838 (98.7)                                                 | 0.899     | 1,826 (98.1)                                                     | 0.892     |
| <i>THADA</i>       | 2   | 43,449,384                | 43,893,878    | B                     | 669                                                                                                                  | 108 (16.1)              | 652 (97.5)                                                            | 0.865     | 646 (96.6)                                                      | 0.863     | 652 (97.5)                                                   | 0.874     | 648 (96.9)                                                       | 0.863     |
| <i>BCL11A</i>      | 2   | 60,557,030                | 60,601,376    | B                     | 60                                                                                                                   | 16 (26.7)               | 59 (98.3)                                                             | 0.816     | 58 (96.7)                                                       | 0.830     | 60 (100.0)                                                   | 0.806     | 60 (100.0)                                                       | 0.817     |
| <i>GRB14-COBL1</i> | 2   | 165,499,547               | 165,732,418   | G/B                   | 360                                                                                                                  | 95 (26.4)               | 349 (96.9)                                                            | 0.861     | 352 (97.8)                                                      | 0.865     | 353 (98.1)                                                   | 0.859     | 353 (98.1)                                                       | 0.869     |
| <i>IRS1</i>        | 2   | 227,007,409               | 227,190,673   | G                     | 268                                                                                                                  | 109 (40.7)              | 259 (96.6)                                                            | 0.866     | 258 (96.3)                                                      | 0.865     | 260 (97.0)                                                   | 0.860     | 259 (96.6)                                                       | 0.857     |
| <i>PPARG</i>       | 3   | 12,207,460                | 12,470,239    | B                     | 361                                                                                                                  | 95 (26.3)               | 353 (97.8)                                                            | 0.851     | 352 (97.5)                                                      | 0.857     | 355 (98.3)                                                   | 0.863     | 347 (96.1)                                                       | 0.852     |
| <i>ADAMTS9</i>     | 3   | 64,691,378                | 64,733,440    | S                     | 78                                                                                                                   | 24 (30.8)               | 78 (100.0)                                                            | 0.869     | 78 (100.0)                                                      | 0.875     | 77 (98.7)                                                    | 0.887     | 75 (96.2)                                                        | 0.869     |
| <i>ADCY5</i>       | 3   | 122,976,417               | 123,207,012   | G                     | 354                                                                                                                  | 114 (32.2)              | 348 (98.3)                                                            | 0.817     | 346 (97.7)                                                      | 0.833     | 348 (98.3)                                                   | 0.839     | 339 (95.8)                                                       | 0.824     |
| <i>IGF2BP2</i>     | 3   | 185,337,787               | 185,596,778   | G/S                   | 322                                                                                                                  | 93 (28.9)               | 317 (98.4)                                                            | 0.840     | 315 (97.8)                                                      | 0.846     | 317 (98.4)                                                   | 0.856     | 314 (97.5)                                                       | 0.836     |
| <i>WFS1</i>        | 4   | 6,262,591                 | 6,336,127     | G                     | 142                                                                                                                  | 47 (33.1)               | 138 (97.2)                                                            | 0.798     | 141 (99.3)                                                      | 0.819     | 135 (95.1)                                                   | 0.820     | 138 (97.2)                                                       | 0.812     |
| <i>ZBED3</i>       | 5   | 76,420,789                | 76,437,700    | S                     | 28                                                                                                                   | 6 (21.4)                | 28 (100.0)                                                            | 0.852     | 27 (96.4)                                                       | 0.868     | 28 (100.0)                                                   | 0.862     | 27 (96.4)                                                        | 0.850     |
| <i>CDKAL1</i>      | 6   | 20,393,906                | 21,191,928    | G/S                   | 981                                                                                                                  | 236 (24.1)              | 969 (98.8)                                                            | 0.852     | 952 (97.0)                                                      | 0.849     | 956 (97.5)                                                   | 0.854     | 967 (98.6)                                                       | 0.851     |
| <i>DGKB</i>        | 7   | 14,185,087                | 15,145,681    | G/S                   | 1,802                                                                                                                | 556 (30.9)              | 1,782 (98.9)                                                          | 0.880     | 1,779 (98.7)                                                    | 0.887     | 1,764 (97.9)                                                 | 0.888     | 1,756 (97.4)                                                     | 0.876     |
| <i>JAZF1</i>       | 7   | 27,783,994                | 28,282,062    | G/S                   | 908                                                                                                                  | 304 (33.5)              | 903 (99.4)                                                            | 0.878     | 901 (99.2)                                                      | 0.882     | 899 (99.0)                                                   | 0.893     | 887 (97.7)                                                       | 0.875     |
| <i>GCK</i>         | 7   | 44,222,002                | 44,266,077    | S/B                   | 49                                                                                                                   | 11 (22.4)               | 48 (98.0)                                                             | 0.716     | 46 (93.9)                                                       | 0.775     | 48 (98.0)                                                    | 0.778     | 45 (91.8)                                                        | 0.738     |
| <i>KLF14</i>       | 7   | 130,421,158               | 130,468,190   | S/B                   | 54                                                                                                                   | 19 (35.2)               | 52 (96.3)                                                             | 0.861     | 51 (94.4)                                                       | 0.878     | 51 (94.4)                                                    | 0.867     | 51 (94.4)                                                        | 0.867     |
| <i>SLC30A8</i>     | 8   | 118,182,117               | 118,223,955   | B                     | 45                                                                                                                   | 7 (15.6)                | 44 (97.8)                                                             | 0.656     | 39 (86.7)                                                       | 0.699     | 42 (93.3)                                                    | 0.709     | 42 (93.3)                                                        | 0.683     |
| <i>GLIS3</i>       | 9   | 4,243,161                 | 4,310,558     | G                     | 155                                                                                                                  | 60 (38.7)               | 153 (98.7)                                                            | 0.839     | 150 (96.8)                                                      | 0.852     | 151 (97.4)                                                   | 0.857     | 151 (97.4)                                                       | 0.837     |
| <i>CDKN2A-B</i>    | 9   | 21,950,408                | 22,159,982    | G/S                   | 230                                                                                                                  | 45 (19.6)               | 225 (97.8)                                                            | 0.796     | 222 (96.5)                                                      | 0.795     | 226 (98.3)                                                   | 0.804     | 216 (93.9)                                                       | 0.797     |
| <i>CDC123</i>      | 10  | 12,160,444                | 12,338,626    | G                     | 351                                                                                                                  | 64 (18.2)               | 343 (97.7)                                                            | 0.830     | 334 (95.2)                                                      | 0.833     | 335 (95.4)                                                   | 0.845     | 303 (86.3)                                                       | 0.802     |
| <i>HHEX-IDE</i>    | 10  | 94,200,768                | 94,498,975    | G                     | 662                                                                                                                  | 205 (31.0)              | 654 (98.8)                                                            | 0.903     | 647 (97.7)                                                      | 0.909     | 638 (96.4)                                                   | 0.905     | 639 (96.5)                                                       | 0.897     |
| <i>TCF7L2</i>      | 10  | 114,746,579               | 114,822,739   | G                     | 111                                                                                                                  | 21 (18.9)               | 111 (100.0)                                                           | 0.817     | 110 (99.1)                                                      | 0.839     | 109 (98.2)                                                   | 0.839     | 110 (99.1)                                                       | 0.827     |
| <i>KCNQ1</i>       | 11  | 2,443,937                 | 2,943,115     | G/S                   | 918                                                                                                                  | 298 (32.5)              | 908 (98.9)                                                            | 0.831     | 899 (97.9)                                                      | 0.853     | 906 (98.7)                                                   | 0.861     | 889 (96.8)                                                       | 0.826     |
| <i>KCNJ11</i>      | 11  | 17,038,776                | 17,424,926    | B                     | 492                                                                                                                  | 69 (14.0)               | 479 (97.4)                                                            | 0.809     | 472 (95.9)                                                      | 0.823     | 481 (97.8)                                                   | 0.819     | 473 (96.1)                                                       | 0.809     |

|                 |    |             |             |       |       |            |              |       |              |       |              |       |              |       |
|-----------------|----|-------------|-------------|-------|-------|------------|--------------|-------|--------------|-------|--------------|-------|--------------|-------|
| <i>CENTD2</i>   | 11 | 72,391,642  | 72,880,613  | B     | 651   | 78 (12.0)  | 640 (98.3)   | 0.813 | 635 (97.5)   | 0.814 | 626 (96.2)   | 0.825 | 628 (96.5)   | 0.821 |
| <i>MTNR1B</i>   | 11 | 92,667,046  | 92,725,521  | G/S/B | 124   | 50 (40.3)  | 124 (100.0)  | 0.873 | 124 (100.0)  | 0.879 | 121 (97.6)   | 0.900 | 124 (100.0)  | 0.887 |
| <i>HMGA2</i>    | 12 | 66,164,516  | 66,303,735  | G     | 209   | 88 (42.1)  | 205 (98.1)   | 0.861 | 199 (95.2)   | 0.891 | 205 (98.1)   | 0.882 | 201 (96.2)   | 0.873 |
| <i>TSPAN8</i>   | 12 | 71,543,070  | 71,667,022  | G     | 189   | 55 (29.1)  | 174 (92.1)   | 0.835 | 170 (89.9)   | 0.840 | 169 (89.4)   | 0.842 | 169 (89.4)   | 0.827 |
| <i>HNF1A</i>    | 12 | 121,157,534 | 121,490,565 | G/S   | 632   | 121 (19.1) | 614 (97.2)   | 0.848 | 613 (97.0)   | 0.851 | 598 (94.6)   | 0.864 | 603 (95.4)   | 0.854 |
| <i>C2CD4A-B</i> | 15 | 62,098,986  | 62,520,663  | S/B   | 742   | 194 (26.1) | 736 (99.2)   | 0.903 | 739 (99.6)   | 0.909 | 737 (99.3)   | 0.912 | 716 (96.5)   | 0.900 |
| <i>PRC1</i>     | 15 | 91,441,382  | 91,566,862  | B     | 175   | 43 (24.6)  | 173 (98.9)   | 0.827 | 173 (98.9)   | 0.836 | 170 (97.1)   | 0.849 | 170 (97.1)   | 0.823 |
| <i>FTO</i>      | 16 | 53,539,508  | 54,185,787  | G/S   | 1,049 | 264 (25.2) | 1,039 (99.0) | 0.871 | 1,038 (99.0) | 0.881 | 1,037 (98.9) | 0.884 | 1,029 (98.1) | 0.866 |
| <i>HNF1B</i>    | 17 | 36,090,544  | 36,108,367  | G     | 17    | 3 (17.6)   | 13 (76.5)    | 0.631 | 14 (82.4)    | 0.683 | 16 (94.1)    | 0.654 | 13 (76.5)    | 0.684 |
| <i>MC4R</i>     | 18 | 57,727,146  | 58,094,636  | G/S   | 535   | 138 (25.8) | 528 (98.7)   | 0.889 | 533 (99.6)   | 0.896 | 529 (98.9)   | 0.899 | 526 (98.3)   | 0.888 |
| <i>CILP2</i>    | 19 | 19,301,231  | 19,792,250  | G     | 646   | 154 (23.8) | 632 (97.8)   | 0.854 | 635 (98.3)   | 0.856 | 631 (97.7)   | 0.851 | 636 (98.5)   | 0.858 |
| <i>GIPR</i>     | 19 | 46,136,486  | 46,408,041  | G/S   | 362   | 49 (13.5)  | 362 (100.0)  | 0.807 | 355 (98.1)   | 0.801 | 356 (98.3)   | 0.823 | 352 (97.2)   | 0.815 |
| <i>HNF4A</i>    | 20 | 43,038,558  | 43,058,096  | S     | 17    | 3 (17.6)   | 17 (100.0)   | 0.746 | 17 (100.0)   | 0.760 | 17 (100.0)   | 0.780 | 17 (100.0)   | 0.722 |

<sup>a</sup>Priority for fine-mapping classified as: gold (G); silver (S); or bronze (B).

<sup>b</sup>High-quality variants defined by IMPUTEv2 info $\geq$ 0.4.

**Supplementary Table 6. Association signals achieving locus-wide significance ( $p_j < 10^{-5}$ ) in established T2D susceptibility loci.**

| Locus              | Index variant    | Chr | Position (b37) | Risk allele | Other allele | MetaboChip GCTA joint model<br>27,206 cases and 57,574 controls |                  |                        | Validation GCTA joint model<br>19,662 cases and 115,140 controls |                  |                       | Combined GCTA joint model<br>46,868 cases and 172,714 controls |                        |
|--------------------|------------------|-----|----------------|-------------|--------------|-----------------------------------------------------------------|------------------|------------------------|------------------------------------------------------------------|------------------|-----------------------|----------------------------------------------------------------|------------------------|
|                    |                  |     |                |             |              | RAF                                                             | OR (95% CI)      | $p_j$                  | RAF                                                              | OR (95% CI)      | $p_j$                 | OR (95% CI)                                                    | $p_j$                  |
| <i>NOTCH2</i>      | N/A <sup>a</sup> | N/A | N/A            | N/A         | N/A          | N/A                                                             | N/A              | N/A                    | N/A                                                              | N/A              | N/A                   | N/A                                                            | N/A                    |
| <i>PROX1</i>       | rs340874         | 1   | 214,159,256    | C           | T            | 0.520                                                           | 1.07 (1.04-1.10) | $1.1 \times 10^{-7}$   | 0.573                                                            | 1.07 (1.04-1.10) | $9.4 \times 10^{-7}$  | 1.07 (1.05-1.09)                                               | $5.1 \times 10^{-13}$  |
| <i>GCKR</i>        | rs780094         | 2   | 27,741,237     | C           | T            | 0.611                                                           | 1.08 (1.05-1.11) | $1.6 \times 10^{-9}$   | 0.637                                                            | 1.04 (1.01-1.07) | 0.0058                | 1.06 (1.04-1.08)                                               | $3.4 \times 10^{-10}$  |
| <i>THADA</i>       | rs77981966       | 2   | 43,777,964     | C           | T            | 0.934                                                           | 1.19 (1.13-1.26) | $1.7 \times 10^{-11}$  | 0.936                                                            | 1.11 (1.05-1.18) | 0.000098              | 1.16 (1.11-1.20)                                               | $4.1 \times 10^{-14}$  |
| <i>BCL11A</i>      | rs243020         | 2   | 60,585,028     | G           | A            | 0.462                                                           | 1.06 (1.03-1.09) | $4.6 \times 10^{-6}$   | 0.475                                                            | 1.06 (1.03-1.09) | 0.000030              | 1.06 (1.04-1.08)                                               | $5.5 \times 10^{-10}$  |
| <i>GRB14-COBL1</i> | rs75297654       | 2   | 165,545,615    | C           | T            | 0.876                                                           | 1.16 (1.11-1.20) | $9.2 \times 10^{-14}$  | 0.857                                                            | 1.05 (1.01-1.10) | 0.0067                | 1.11 (1.08-1.14)                                               | $6.3 \times 10^{-13}$  |
| <i>IRS1</i>        | rs2972156        | 2   | 227,117,778    | G           | C            | 0.621                                                           | 1.11 (1.08-1.14) | $1.4 \times 10^{-15}$  | 0.606                                                            | 1.07 (1.04-1.10) | $8.8 \times 10^{-7}$  | 1.09 (1.07-1.11)                                               | $4.2 \times 10^{-20}$  |
| <i>PPARG</i>       | rs11712037       | 3   | 12,344,730     | C           | G            | 0.862                                                           | 1.12 (1.08-1.16) | $3.7 \times 10^{-9}$   | 0.881                                                            | 1.17 (1.12-1.22) | $2.0 \times 10^{-13}$ | 1.14 (1.11-1.17)                                               | $1.7 \times 10^{-20}$  |
| <i>ADAMTS9</i>     | rs17676309       | 3   | 64,730,121     | C           | T            | 0.590                                                           | 1.07 (1.05-1.10) | $7.5 \times 10^{-8}$   | 0.597                                                            | 1.06 (1.04-1.09) | $7.6 \times 10^{-6}$  | 1.07 (1.05-1.09)                                               | $2.8 \times 10^{-12}$  |
| <i>ADCY5</i>       | rs11708067       | 3   | 123,065,778    | A           | G            | 0.786                                                           | 1.11 (1.08-1.15) | $5.1 \times 10^{-12}$  | 0.785                                                            | 1.11 (1.08-1.15) | $1.3 \times 10^{-10}$ | 1.11 (1.09-1.14)                                               | $4.2 \times 10^{-21}$  |
| <i>IGF2BP2</i>     | rs35510946       | 3   | 185,518,910    | A           | G            | 0.301                                                           | 1.14 (1.10-1.17) | $3.9 \times 10^{-20}$  | 0.295                                                            | 1.15 (1.12-1.18) | $2.7 \times 10^{-21}$ | 1.14 (1.12-1.16)                                               | $1.1 \times 10^{-39}$  |
| <i>WFS1</i>        | rs10937721       | 4   | 6,306,763      | C           | G            | 0.580                                                           | 1.08 (1.05-1.11) | $1.2 \times 10^{-9}$   | 0.572                                                            | 1.09 (1.06-1.12) | $5.5 \times 10^{-10}$ | 1.09 (1.07-1.11)                                               | $4.3 \times 10^{-18}$  |
| <i>ZBED3</i>       | rs7732130        | 5   | 76,435,004     | G           | A            | 0.278                                                           | 1.09 (1.06-1.12) | $7.1 \times 10^{-10}$  | 0.270                                                            | 1.06 (1.03-1.09) | 0.00028               | 1.08 (1.05-1.10)                                               | $2.4 \times 10^{-12}$  |
| <i>CDKAL1</i>      | rs35261542       | 6   | 20,675,792     | A           | C            | 0.280                                                           | 1.15 (1.12-1.18) | $2.2 \times 10^{-24}$  | 0.239                                                            | 1.18 (1.15-1.22) | $3.3 \times 10^{-28}$ | 1.17 (1.14-1.19)                                               | $1.5 \times 10^{-50}$  |
| <i>DGKB</i>        | rs10276674       | 7   | 14,922,007     | C           | T            | 0.183                                                           | 1.08 (1.04-1.11) | $4.5 \times 10^{-6}$   | 0.216                                                            | 1.09 (1.05-1.12) | $1.3 \times 10^{-6}$  | 1.08 (1.06-1.11)                                               | $2.8 \times 10^{-11}$  |
|                    | rs1974620        | 7   | 15,065,467     | T           | C            | 0.519                                                           | 1.06 (1.04-1.09) | $1.6 \times 10^{-6}$   | 0.515                                                            | 1.05 (1.03-1.08) | 0.00014               | 1.06 (1.04-1.08)                                               | $1.0 \times 10^{-9}$   |
| <i>JAZF1</i>       | rs1513272        | 7   | 28,200,097     | C           | T            | 0.518                                                           | 1.10 (1.07-1.12) | $4.8 \times 10^{-13}$  | 0.528                                                            | 1.10 (1.08-1.13) | $2.4 \times 10^{-13}$ | 1.10 (1.08-1.12)                                               | $7.8 \times 10^{-25}$  |
| <i>GCK</i>         | rs878521         | 7   | 44,255,643     | A           | G            | 0.235                                                           | 1.10 (1.07-1.13) | $2.6 \times 10^{-10}$  | 0.227                                                            | 1.04 (1.01-1.08) | 0.010                 | 1.07 (1.05-1.10)                                               | $1.3 \times 10^{-10}$  |
| <i>KLF14</i>       | N/A <sup>a</sup> | N/A | N/A            | N/A         | N/A          | N/A                                                             | N/A              | N/A                    | N/A                                                              | N/A              | N/A                   | N/A                                                            | N/A                    |
| <i>SLC30A8</i>     | rs13266634       | 8   | 118,184,783    | C           | T            | 0.676                                                           | 1.12 (1.09-1.15) | $1.1 \times 10^{-16}$  | 0.666                                                            | 1.11 (1.08-1.15) | $6.4 \times 10^{-13}$ | 1.12 (1.09-1.14)                                               | $5.0 \times 10^{-28}$  |
| <i>GLIS3</i>       | chr9:4294707:l   | 9   | 4,294,707      | l           | R            | 0.360                                                           | 1.08 (1.05-1.11) | $1.5 \times 10^{-8}$   | 0.340                                                            | 1.05 (1.02-1.08) | 0.00026               | 1.07 (1.05-1.09)                                               | $3.1 \times 10^{-11}$  |
| <i>CDKN2B</i>      | rs10811660       | 9   | 22,134,068     | G           | A            | 0.830                                                           | 1.32 (1.27-1.38) | $2.4 \times 10^{-44}$  | 0.817                                                            | 1.21 (1.17-1.26) | $2.6 \times 10^{-21}$ | 1.27 (1.23-1.30)                                               | $1.1 \times 10^{-61}$  |
|                    | rs10757283       | 9   | 22,134,172     | T           | C            | 0.437                                                           | 1.14 (1.10-1.17) | $7.4 \times 10^{-18}$  | 0.436                                                            | 1.11 (1.07-1.14) | $1.3 \times 10^{-10}$ | 1.12 (1.10-1.14)                                               | $3.6 \times 10^{-26}$  |
| <i>CDC123</i>      | rs11257658       | 10  | 12,309,268     | A           | G            | 0.217                                                           | 1.11 (1.08-1.14) | $1.6 \times 10^{-11}$  | 0.232                                                            | 1.08 (1.04-1.11) | $5.6 \times 10^{-6}$  | 1.09 (1.07-1.12)                                               | $1.2 \times 10^{-15}$  |
| <i>HHEX</i>        | rs11187140       | 10  | 94,466,910     | G           | A            | 0.632                                                           | 1.10 (1.08-1.13) | $5.5 \times 10^{-14}$  | 0.609                                                            | 1.13 (1.10-1.17) | $1.4 \times 10^{-19}$ | 1.12 (1.10-1.14)                                               | $1.5 \times 10^{-31}$  |
| <i>TCF7L2</i>      | rs7903146        | 10  | 114,758,349    | T           | C            | 0.260                                                           | 1.38 (1.35-1.42) | $3.1 \times 10^{-117}$ | 0.294                                                            | 1.33 (1.29-1.37) | $2.1 \times 10^{-80}$ | 1.36 (1.33-1.38)                                               | $2.7 \times 10^{-195}$ |
| <i>KCNQ1</i>       | chr11:2692322:D  | 11  | 2,692,322      | D           | R            | 0.374                                                           | 1.08 (1.05-1.10) | $3.5 \times 10^{-8}$   | 0.413                                                            | 1.09 (1.06-1.12) | $1.2 \times 10^{-8}$  | 1.08 (1.06-1.10)                                               | $2.3 \times 10^{-15}$  |
|                    | rs2283220        | 11  | 2,755,548      | A           | G            | 0.661                                                           | 1.06 (1.03-1.09) | 0.000016               | 0.710                                                            | 1.05 (1.02-1.08) | 0.0031                | 1.06 (1.03-1.08)                                               | $2.4 \times 10^{-7}$   |
|                    | rs2237895        | 11  | 2,857,194      | C           | A            | 0.428                                                           | 1.08 (1.05-1.11) | $6.6 \times 10^{-7}$   | 0.433                                                            | 1.07 (1.03-1.10) | $2.8 \times 10^{-4}$  | 1.07 (1.05-1.10)                                               | $5.3 \times 10^{-10}$  |
|                    | rs74046911       | 11  | 2,858,636      | C           | T            | 0.951                                                           | 1.32 (1.24-1.40) | $1.7 \times 10^{-17}$  | 0.943                                                            | 1.25 (1.17-1.34) | $4.8 \times 10^{-10}$ | 1.29 (1.23-1.35)                                               | $9.6 \times 10^{-26}$  |
|                    | rs458069         | 11  | 2,858,800      | G           | C            | 0.707                                                           | 1.06 (1.03-1.10) | 0.00026                | 0.707                                                            | 1.07 (1.03-1.11) | 0.00085               | 1.06 (1.04-1.09)                                               | $1.0 \times 10^{-6}$   |
| <i>KCNJ11</i>      | rs5215           | 11  | 17,408,630     | C           | T            | 0.389                                                           | 1.08 (1.05-1.11) | $1.3 \times 10^{-9}$   | 0.386                                                            | 1.06 (1.03-1.09) | 0.000034              | 1.07 (1.05-1.09)                                               | $3.7 \times 10^{-13}$  |
| <i>CENTD2</i>      | chr11:72460930:l | 11  | 72,460,930     | R           | l            | 0.823                                                           | 1.10 (1.06-1.13) | $5.9 \times 10^{-8}$   | 0.826                                                            | 1.10 (1.06-1.14) | $2.4 \times 10^{-7}$  | 1.10 (1.07-1.12)                                               | $6.7 \times 10^{-14}$  |
| <i>MTNR1B</i>      | rs10830963       | 11  | 92,708,710     | G           | C            | 0.283                                                           | 1.10 (1.07-1.13) | $7.9 \times 10^{-12}$  | 0.248                                                            | 1.07 (1.03-1.10) | 0.000072              | 1.09 (1.06-1.11)                                               | $8.5 \times 10^{-15}$  |
| <i>HMGGA2</i>      | rs2583941        | 12  | 66,204,598     | A           | G            | 0.090                                                           | 1.13 (1.08-1.18) | $6.0 \times 10^{-8}$   | 0.080                                                            | 1.10 (1.05-1.15) | 0.000048              | 1.11 (1.08-1.15)                                               | $1.6 \times 10^{-11}$  |
| <i>TSPAN8</i>      | rs7961581        | 12  | 71,663,102     | C           | T            | 0.265                                                           | 1.07 (1.04-1.10) | $1.4 \times 10^{-6}$   | 0.270                                                            | 1.04 (1.01-1.07) | 0.012                 | 1.06 (1.03-1.08)                                               | $1.8 \times 10^{-7}$   |

|               |                   |    |             |   |   |       |                  |                       |       |                  |                       |                  |                       |
|---------------|-------------------|----|-------------|---|---|-------|------------------|-----------------------|-------|------------------|-----------------------|------------------|-----------------------|
| <i>HNF1A</i>  | rs1169288         | 12 | 121,416,650 | C | A | 0.334 | 1.10 (1.07-1.13) | 5.4x10 <sup>-10</sup> | 0.316 | 1.08 (1.05-1.12) | 2.8x10 <sup>-6</sup>  | 1.09 (1.07-1.12) | 8.1x10 <sup>-15</sup> |
|               | rs1800574         | 12 | 121,416,864 | T | C | 0.027 | 1.21 (1.11-1.31) | 5.2x10 <sup>-6</sup>  | 0.020 | 1.23 (1.12-1.35) | 0.000026              | 1.22 (1.14-1.29) | 5.1x10 <sup>-10</sup> |
|               | chr12:121440833:D | 12 | 121,440,833 | R | D | 0.416 | 1.06 (1.03-1.09) | 0.000028              | 0.382 | 1.08 (1.04-1.11) | 2.5x10 <sup>-6</sup>  | 1.07 (1.05-1.09) | 2.9x10 <sup>-10</sup> |
| <i>C2CD4B</i> | rs7161785         | 15 | 62,395,224  | G | C | 0.555 | 1.04 (1.02-1.07) | 0.00068               | 0.551 | 1.07 (1.04-1.10) | 8.2x10 <sup>-7</sup>  | 1.06 (1.04-1.08) | 4.9x10 <sup>-9</sup>  |
| <i>PRC1</i>   | rs3803563         | 15 | 91,531,352  | A | C | 0.175 | 1.11 (1.07-1.15) | 2.2x10 <sup>-10</sup> | 0.177 | 1.05 (1.02-1.09) | 0.0049                | 1.08 (1.06-1.11) | 5.6x10 <sup>-11</sup> |
| <i>FTO</i>    | rs9927317         | 16 | 53,820,996  | G | C | 0.396 | 1.14 (1.11-1.17) | 6.8x10 <sup>-25</sup> | 0.399 | 1.13 (1.10-1.16) | 1.2x10 <sup>-19</sup> | 1.14 (1.12-1.16) | 7.9x10 <sup>-43</sup> |
| <i>HNF1B</i>  | rs4430796         | 17 | 36,098,040  | G | A | 0.455 | 1.09 (1.07-1.12) | 5.2x10 <sup>-12</sup> | 0.482 | 1.08 (1.05-1.11) | 2.0x10 <sup>-7</sup>  | 1.09 (1.07-1.11) | 7.8x10 <sup>-18</sup> |
| <i>MC4R</i>   | chr18:57739289:D  | 18 | 57,739,289  | D | R | 0.234 | 1.05 (1.02-1.09) | 0.00079               | 0.254 | 1.07 (1.03-1.10) | 0.000059              | 1.06 (1.04-1.08) | 1.9x10 <sup>-7</sup>  |
|               | rs17066842        | 18 | 58,040,624  | G | A | 0.961 | 1.13 (1.06-1.21) | 0.00033               | 0.948 | 1.11 (1.04-1.19) | 0.0012                | 1.12 (1.07-1.17) | 1.4x10 <sup>-6</sup>  |
| <i>CILP2</i>  | rs72999033        | 19 | 19,366,632  | T | C | 0.069 | 1.20 (1.15-1.26) | 6.5x10 <sup>-14</sup> | 0.065 | 1.10 (1.04-1.16) | 0.00043               | 1.16 (1.12-1.20) | 1.8x10 <sup>-15</sup> |
| <i>GIPR</i>   | rs4399645         | 19 | 46,166,073  | T | C | 0.395 | 1.07 (1.04-1.10) | 4.4x10 <sup>-7</sup>  | 0.441 | 1.05 (1.01-1.08) | 0.0046                | 1.06 (1.04-1.08) | 1.4x10 <sup>-8</sup>  |
|               | rs2238689         | 19 | 46,178,661  | C | T | 0.425 | 1.09 (1.07-1.12) | 9.7x10 <sup>-12</sup> | 0.424 | 1.07 (1.04-1.10) | 9.0x10 <sup>-6</sup>  | 1.08 (1.06-1.11) | 8.3x10 <sup>-16</sup> |
| <i>HNF4A</i>  | rs1800961         | 20 | 43,042,364  | T | C | 0.034 | 1.16 (1.09-1.24) | 0.000011              | 0.041 | 1.16 (1.08-1.25) | 0.000051              | 1.16 (1.10-1.22) | 2.3x10 <sup>-9</sup>  |

Each association signal was represented by an index variant in the GCTA-COJO joint regression model on the basis of: (i) summary statistics from a combined meta-analysis of 46,868 cases and 172,714 controls of European ancestry; and (ii) reference genotype data from GoDARTS (3,298 cases and 3,708 controls of European ancestry from the UK) to approximate LD across fine-mapping regions.

Chr: chromosome. RAF: risk allele frequency. OR: odds-ratio for risk allele. CI: confidence interval.

<sup>a</sup>No variants achieved locus-wide significance at the *NOTCH2* and *KLF14* loci.

**Supplementary Table 7. Comparison of summary statistics for association signals in established T2D susceptibility loci obtained from meta-analysis of MetaboChip studies: (i) unconditional; (ii) GCTA joint model using GoDARTS as reference; and (iii) exact conditioning after adjusting for all other index variants in the fine-mapping region.**

| Locus         | Index variant     | Chr | Position (b37) | Risk allele | Other allele | RAF   | MetaboChip unconditional meta-analysis |                       | MetaboChip GCTA joint model GoDARTS reference study |                       | MetaboChip exact conditional meta-analysis |                       |
|---------------|-------------------|-----|----------------|-------------|--------------|-------|----------------------------------------|-----------------------|-----------------------------------------------------|-----------------------|--------------------------------------------|-----------------------|
|               |                   |     |                |             |              |       | OR (95% CI)                            | p-value               | OR (95% CI)                                         | p-value               | OR (95% CI)                                | p-value               |
| <i>DGKB</i>   | rs10276674        | 7   | 14,922,007     | C           | T            | 0.183 | 1.07 (1.04-1.11)                       | 0.000013              | 1.08 (1.04-1.11)                                    | 4.5x10 <sup>-6</sup>  | 1.07 (1.04-1.11)                           | 0.000020              |
|               | rs1974620         | 7   | 15,065,467     | T           | C            | 0.519 | 1.06 (1.04-1.09)                       | 9.0x10 <sup>-7</sup>  | 1.06 (1.04-1.09)                                    | 1.6x10 <sup>-6</sup>  | 1.06 (1.04-1.09)                           | 1.4x10 <sup>-6</sup>  |
| <i>CDKN2B</i> | rs10811660        | 9   | 22,134,068     | G           | A            | 0.830 | 1.21 (1.17-1.25)                       | 9.7x10 <sup>-28</sup> | 1.32 (1.27-1.38)                                    | 2.4x10 <sup>-44</sup> | 1.31 (1.27-1.37)                           | 7.0x10 <sup>-43</sup> |
|               | rs10757283        | 9   | 22,134,172     | T           | C            | 0.437 | 1.03 (1.01-1.06)                       | 0.015                 | 1.14 (1.10-1.17)                                    | 7.4x10 <sup>-18</sup> | 1.14 (1.11-1.18)                           | 2.8x10 <sup>-19</sup> |
| <i>KCNQ1</i>  | chr11:2692322:D   | 11  | 2,692,322      | D           | R            | 0.374 | 1.08 (1.05-1.11)                       | 2.4x10 <sup>-9</sup>  | 1.08 (1.05-1.10)                                    | 3.5x10 <sup>-8</sup>  | 1.09 (1.06-1.12)                           | 5.2x10 <sup>-10</sup> |
|               | rs2283220         | 11  | 2,755,548      | A           | G            | 0.661 | 1.05 (1.03-1.08)                       | 0.00013               | 1.06 (1.03-1.09)                                    | 0.000016              | 1.05 (1.02-1.08)                           | 0.00032               |
|               | rs2237895         | 11  | 2,857,194      | C           | A            | 0.428 | 1.12 (1.09-1.15)                       | 8.7x10 <sup>-19</sup> | 1.08 (1.05-1.11)                                    | 6.6x10 <sup>-7</sup>  | 1.07 (1.04-1.11)                           | 0.000013              |
|               | rs74046911        | 11  | 2,858,636      | C           | T            | 0.951 | 1.32 (1.24-1.40)                       | 2.3x10 <sup>-19</sup> | 1.32 (1.24-1.40)                                    | 1.7x10 <sup>-17</sup> | 1.33 (1.24-1.42)                           | 5.9x10 <sup>-18</sup> |
| <i>HNF1A</i>  | rs458069          | 11  | 2,858,800      | G           | C            | 0.707 | 1.07 (1.04-1.10)                       | 1.0x10 <sup>-6</sup>  | 1.06 (1.03-1.10)                                    | 0.00026               | 1.06 (1.02-1.09)                           | 0.0017                |
|               | rs1169288         | 12  | 121,416,650    | C           | A            | 0.334 | 1.06 (1.03-1.09)                       | 0.000014              | 1.10 (1.07-1.13)                                    | 5.4x10 <sup>-10</sup> | 1.09 (1.06-1.12)                           | 9.3x10 <sup>-9</sup>  |
|               | rs1800574         | 12  | 121,416,864    | T           | C            | 0.027 | 1.15 (1.07-1.25)                       | 0.00039               | 1.21 (1.11-1.31)                                    | 5.2x10 <sup>-6</sup>  | 1.21 (1.11-1.31)                           | 5.4x10 <sup>-6</sup>  |
| <i>MC4R</i>   | chr12:121440833:D | 12  | 121,440,833    | R           | D            | 0.416 | 1.01 (0.99-1.04)                       | 0.29                  | 1.06 (1.03-1.09)                                    | 0.000028              | 1.06 (1.03-1.09)                           | 0.00017               |
|               | chr18:57739289:D  | 18  | 57,739,289     | D           | R            | 0.234 | 1.06 (1.02-1.09)                       | 0.00044               | 1.05 (1.02-1.09)                                    | 0.00079               | 1.05 (1.02-1.09)                           | 0.00091               |
|               | rs17066842        | 18  | 58,040,624     | G           | A            | 0.961 | 1.13 (1.06-1.21)                       | 0.00030               | 1.13 (1.06-1.21)                                    | 0.00033               | 1.12 (1.05-1.20)                           | 0.00064               |
| <i>GIPR</i>   | rs4399645         | 19  | 46,166,073     | T           | C            | 0.395 | 1.05 (1.02-1.08)                       | 0.00030               | 1.07 (1.04-1.10)                                    | 4.4x10 <sup>-7</sup>  | 1.06 (1.04-1.09)                           | 5.7x10 <sup>-6</sup>  |
|               | rs2238689         | 19  | 46,178,661     | C           | T            | 0.425 | 1.08 (1.05-1.10)                       | 1.7x10 <sup>-8</sup>  | 1.09 (1.07-1.12)                                    | 9.7x10 <sup>-12</sup> | 1.09 (1.06-1.12)                           | 2.5x10 <sup>-10</sup> |

Each association signal was represented by an index variant in the GCTA-COJO joint regression model on the basis of: (i) summary statistics from the meta-analysis of MetaboChip studies in 27,206 cases and 57,574 controls of European ancestry; and (ii) reference genotype data from GoDARTS (3,298 cases and 3,708 controls of European ancestry from the UK) to approximate LD across fine-mapping regions.

Chr: chromosome. RAF: risk allele frequency. OR: odds-ratio for risk allele. CI: confidence interval.

**Supplementary Table 8. Summary of 99% credible sets for association signals at established T2D susceptibility.**

| Locus              | Index variant    | Chr | Position (b37) | Risk allele | Other allele | RAF   | p-value                | OR (95% CI)      | 99% credible set |               |                     |                    |
|--------------------|------------------|-----|----------------|-------------|--------------|-------|------------------------|------------------|------------------|---------------|---------------------|--------------------|
|                    |                  |     |                |             |              |       |                        |                  | SNPs             | Interval (bp) | Interval start (bp) | Interval stop (bp) |
| <i>NOTCH2</i>      | N/A              | 1   | N/A            | N/A         | N/A          | N/A   | N/A                    | N/A              | 108              | 116,782       | 120,437,718         | 120,554,499        |
| <i>PROX1</i>       | rs340874         | 1   | 214,159,256    | C           | T            | 0.520 | 1.1x10 <sup>-7</sup>   | 1.07 (1.04-1.10) | 19               | 17,970        | 214,145,706         | 214,163,675        |
| <i>GCKR</i>        | rs780094         | 2   | 27,741,237     | C           | T            | 0.611 | 8.5x10 <sup>-10</sup>  | 1.08 (1.06-1.11) | 13               | 154,775       | 27,598,097          | 27,752,871         |
| <i>THADA</i>       | rs77981966       | 2   | 43,777,964     | C           | T            | 0.934 | 1.7x10 <sup>-11</sup>  | 1.19 (1.13-1.26) | 247              | 403,194       | 43,451,957          | 43,855,150         |
| <i>BCL11A</i>      | rs243020         | 2   | 60,585,028     | G           | A            | 0.462 | 2.5x10 <sup>-6</sup>   | 1.06 (1.04-1.09) | 35               | 42,171        | 60,559,206          | 60,601,376         |
| <i>GRB14-COBL1</i> | rs75297654       | 2   | 165,545,615    | C           | T            | 0.876 | 8.9x10 <sup>-14</sup>  | 1.16 (1.11-1.20) | 24               | 53,691        | 165,501,849         | 165,555,539        |
| <i>IRS1</i>        | rs2972156        | 2   | 227,117,778    | G           | C            | 0.621 | 1.3x10 <sup>-15</sup>  | 1.11 (1.08-1.14) | 65               | 80,232        | 227,083,411         | 227,163,642        |
| <i>PPARG</i>       | rs11712037       | 3   | 12,344,730     | C           | G            | 0.862 | 4.6x10 <sup>-8</sup>   | 1.11 (1.07-1.15) | 27               | 67,173        | 12,329,783          | 12,396,955         |
| <i>ADAMTS9</i>     | rs17676309       | 3   | 64,730,121     | C           | T            | 0.590 | 1.2x10 <sup>-7</sup>   | 1.07 (1.04-1.10) | 27               | 30,677        | 64,699,445          | 64,730,121         |
| <i>ADCY5</i>       | rs11708067       | 3   | 123,065,778    | A           | G            | 0.786 | 1.1x10 <sup>-13</sup>  | 1.12 (1.09-1.16) | 17               | 42,051        | 123,054,770         | 123,096,820        |
| <i>IGF2BP2</i>     | rs35510946       | 3   | 185,518,910    | A           | G            | 0.301 | 3.7x10 <sup>-20</sup>  | 1.14 (1.10-1.17) | 50               | 42,317        | 185,495,320         | 185,537,636        |
| <i>WFS1</i>        | rs10937721       | 4   | 6,306,763      | C           | G            | 0.580 | 7.6x10 <sup>-11</sup>  | 1.09 (1.06-1.12) | 82               | 42,179        | 6,264,585           | 6,306,763          |
| <i>ZBED3</i>       | rs7732130        | 5   | 76,435,004     | G           | A            | 0.278 | 6.4x10 <sup>-10</sup>  | 1.09 (1.06-1.12) | 5                | 10,056        | 76,424,949          | 76,435,004         |
| <i>CDKAL1</i>      | rs35261542       | 6   | 20,675,792     | A           | C            | 0.280 | 9.6x10 <sup>-23</sup>  | 1.15 (1.12-1.18) | 8                | 30,073        | 20,673,880          | 20,703,952         |
| <i>DGKB</i>        | rs10276674       | 7   | 14,922,007     | C           | T            | 0.183 | 0.000020               | 1.07 (1.04-1.11) | 4799             | 960,535       | 14,185,147          | 15,145,681         |
|                    | rs1974620        | 7   | 15,065,467     | T           | C            | 0.519 | 1.4x10 <sup>-6</sup>   | 1.06 (1.04-1.09) | 266              | 953,983       | 14,187,402          | 15,141,384         |
| <i>JAZF1</i>       | rs1513272        | 7   | 28,200,097     | C           | T            | 0.518 | 3.9x10 <sup>-12</sup>  | 1.09 (1.07-1.12) | 16               | 58,195        | 28,174,263          | 28,232,457         |
| <i>GCK</i>         | rs878521         | 7   | 44,255,643     | A           | G            | 0.235 | 1.2x10 <sup>-9</sup>   | 1.09 (1.06-1.13) | 18               | 41,459        | 44,223,721          | 44,265,179         |
| <i>KLF14</i>       | N/A              | 7   | N/A            | N/A         | N/A          | N/A   | N/A                    | N/A              | 171              | 46,857        | 130,421,159         | 130,468,015        |
| <i>SLC30A8</i>     | rs13266634       | 8   | 118,184,783    | C           | T            | 0.676 | 1.3x10 <sup>-18</sup>  | 1.13 (1.10-1.16) | 6                | 33,133        | 118,184,783         | 118,217,915        |
| <i>GLIS3</i>       | chr9:4294707:I   | 9   | 4,294,707      | I           | R            | 0.360 | 6.5x10 <sup>-8</sup>   | 1.07 (1.05-1.10) | 10               | 15,453        | 4,283,137           | 4,298,589          |
| <i>CDKN2A-B</i>    | rs10811660       | 9   | 22,134,068     | G           | A            | 0.830 | 7.0x10 <sup>-43</sup>  | 1.32 (1.27-1.37) | 6                | 1,397         | 22,132,698          | 22,134,094         |
|                    | rs10757283       | 9   | 22,134,172     | T           | C            | 0.437 | 2.8x10 <sup>-19</sup>  | 1.14 (1.11-1.18) | 5                | 1,007         | 22,133,645          | 22,134,651         |
| <i>CDC123</i>      | rs11257658       | 10  | 12,309,268     | A           | G            | 0.217 | 2.9x10 <sup>-10</sup>  | 1.10 (1.07-1.14) | 12               | 77,391        | 12,250,620          | 12,328,010         |
| <i>HHEX</i>        | rs11187140       | 10  | 94,466,910     | G           | A            | 0.632 | 1.7x10 <sup>-14</sup>  | 1.11 (1.08-1.14) | 40               | 128,798       | 94,361,377          | 94,490,174         |
| <i>TCF7L2</i>      | rs7903146        | 10  | 114,758,349    | T           | C            | 0.260 | 5.8x10 <sup>-120</sup> | 1.39 (1.35-1.43) | 3                | 4,279         | 114,754,071         | 114,758,349        |
| <i>KCNQ1</i>       | chr11:2692322:D  | 11  | 2,692,322      | D           | R            | 0.374 | 5.2x10 <sup>-10</sup>  | 1.09 (1.06-1.11) | 12               | 32,660        | 2,691,471           | 2,724,130          |
|                    | rs2283220        | 11  | 2,755,548      | A           | G            | 0.661 | 0.00032                | 1.05 (1.02-1.08) | 2258             | 498,068       | 2,444,732           | 2,942,799          |
|                    | rs2237895        | 11  | 2,857,194      | C           | A            | 0.428 | 0.000013               | 1.07 (1.04-1.11) | 680              | 496,351       | 2,446,432           | 2,942,782          |
|                    | rs74046911       | 11  | 2,858,636      | C           | T            | 0.951 | 5.9x10 <sup>-18</sup>  | 1.33 (1.25-1.42) | 3                | 197           | 2,858,440           | 2,858,636          |
|                    | rs458069         | 11  | 2,858,800      | G           | C            | 0.707 | 0.0017                 | 1.06 (1.02-1.09) | 2309             | 498,706       | 2,444,094           | 2,942,799          |
| <i>KCNJ11</i>      | rs5215           | 11  | 17,408,630     | C           | T            | 0.389 | 1.5x10 <sup>-10</sup>  | 1.09 (1.06-1.11) | 21               | 53,874        | 17,368,013          | 17,421,886         |
| <i>CENTD2</i>      | chr11:72460930:I | 11  | 72,460,930     | R           | I            | 0.823 | 8.8x10 <sup>-9</sup>   | 1.10 (1.07-1.14) | 27               | 380,747       | 72,429,579          | 72,810,325         |

|               |                   |    |             |   |   |       |                       |                  |      |         |             |             |
|---------------|-------------------|----|-------------|---|---|-------|-----------------------|------------------|------|---------|-------------|-------------|
| <i>MTNR1B</i> | rs10830963        | 11 | 92,708,710  | G | C | 0.283 | $2.9 \times 10^{-12}$ | 1.10 (1.07-1.13) | 1    | 1       | 92,708,710  | 92,708,710  |
| <i>HMG2</i>   | rs2583941         | 12 | 66,204,598  | A | G | 0.090 | $7.5 \times 10^{-9}$  | 1.13 (1.09-1.18) | 72   | 95,454  | 66,165,471  | 66,260,924  |
| <i>TSPAN8</i> | rs7961581         | 12 | 71,663,102  | C | T | 0.265 | $1.1 \times 10^{-6}$  | 1.07 (1.04-1.10) | 76   | 122,817 | 71,543,370  | 71,666,186  |
| <i>HNF1A</i>  | rs1169288         | 12 | 121,416,650 | C | A | 0.334 | $9.4 \times 10^{-9}$  | 1.09 (1.06-1.12) | 27   | 99,112  | 121,380,544 | 121,479,655 |
|               | rs1800574         | 12 | 121,416,864 | T | C | 0.027 | $5.4 \times 10^{-6}$  | 1.21 (1.11-1.31) | 899  | 332,274 | 121,157,611 | 121,489,884 |
|               | chr12:121440833:D | 12 | 121,440,833 | R | D | 0.416 | 0.00017               | 1.06 (1.03-1.09) | 1427 | 332,888 | 121,157,611 | 121,490,498 |
| <i>C2CD4B</i> | rs7161785         | 15 | 62,395,224  | G | C | 0.555 | 0.00058               | 1.05 (1.02-1.07) | 1851 | 421,123 | 62,099,341  | 62,520,463  |
| <i>PRC1</i>   | rs3803563         | 15 | 91,531,352  | A | C | 0.175 | $3.6 \times 10^{-10}$ | 1.11 (1.07-1.14) | 51   | 59,204  | 91,502,383  | 91,561,586  |
| <i>FTO</i>    | rs9927317         | 16 | 53,820,996  | G | C | 0.396 | $1.7 \times 10^{-24}$ | 1.14 (1.11-1.17) | 72   | 28,560  | 53,799,507  | 53,828,066  |
| <i>HNF1B</i>  | rs4430796         | 17 | 36,098,040  | G | A | 0.455 | $6.3 \times 10^{-12}$ | 1.09 (1.07-1.12) | 7    | 5,791   | 36,097,775  | 36,103,565  |
| <i>MC4R</i>   | chr18:57739289:D  | 18 | 57,739,289  | D | R | 0.234 | 0.00091               | 1.05 (1.02-1.08) | 1343 | 367,192 | 57,727,147  | 58,094,338  |
|               | rs17066842        | 18 | 58,040,624  | G | A | 0.961 | 0.00064               | 1.12 (1.05-1.20) | 1275 | 367,490 | 57,727,147  | 58,094,636  |
| <i>CILP2</i>  | rs72999033        | 19 | 19,366,632  | T | C | 0.069 | $5.3 \times 10^{-13}$ | 1.19 (1.14-1.25) | 29   | 350,425 | 19,366,632  | 19,717,056  |
| <i>GIPR</i>   | rs4399645         | 19 | 46,166,073  | T | C | 0.395 | $5.7 \times 10^{-6}$  | 1.06 (1.03-1.09) | 704  | 270,315 | 46,137,712  | 46,408,026  |
|               | rs2238689         | 19 | 46,178,661  | C | T | 0.425 | $2.5 \times 10^{-10}$ | 1.09 (1.06-1.11) | 26   | 20,506  | 46,158,156  | 46,178,661  |
| <i>HNF4A</i>  | rs1800961         | 20 | 43,042,364  | T | C | 0.034 | $7.1 \times 10^{-6}$  | 1.16 (1.09-1.24) | 17   | 16,286  | 43,041,546  | 43,057,831  |

Association summary statistics and credible set construction are based on the meta-analysis of Metabochip studies in 27,206 cases and 57,574 controls of European ancestry. In loci with multiple signals of association, results are presented from exact conditional analysis after adjusting for all other index variants in the fine-mapping region. In loci with a single signal of association, results are presented from unconditional analysis. Chr: chromosome. RAF: risk allele frequency. OR: odds-ratio for risk allele. CI: confidence interval.

**Supplementary Table 9. Membership of 99% credible sets containing no more than ten variants driving distinct association signals at established T2D susceptibility loci.**

| Locus           | Index variant | 99% credible set variants |     |                |             |              |       |                        |                  |                                                     |
|-----------------|---------------|---------------------------|-----|----------------|-------------|--------------|-------|------------------------|------------------|-----------------------------------------------------|
|                 |               | Variant                   | Chr | Position (b37) | Risk allele | Other allele | RAF   | p-value                | OR (95% CI)      | Posterior probability of driving association signal |
| <i>MTNR1B</i>   | rs10830963    | rs10830963                | 11  | 92,708,710     | G           | C            | 0.283 | 2.9x10 <sup>-12</sup>  | 1.10 (1.07-1.13) | 99.8%                                               |
| <i>TCF7L2</i>   | rs7903146     | rs7903146                 | 10  | 114,758,349    | T           | C            | 0.260 | 5.8x10 <sup>-120</sup> | 1.39 (1.35-1.43) | 77.6%                                               |
|                 |               | rs35198068                | 10  | 114,754,784    | C           | T            | 0.261 | 3.4x10 <sup>-119</sup> | 1.39 (1.35-1.43) | 11.9%                                               |
|                 |               | rs34872471                | 10  | 114,754,071    | C           | T            | 0.261 | 5.3x10 <sup>-119</sup> | 1.39 (1.35-1.43) | 10.4%                                               |
| <i>KCNQ1</i>    | rs74046911    | rs74046911                | 11  | 2,858,636      | C           | T            | 0.951 | 5.9x10 <sup>-18</sup>  | 1.33 (1.25-1.42) | 84.7%                                               |
|                 |               | rs2237897                 | 11  | 2,858,546      | C           | T            | 0.951 | 5.4x10 <sup>-17</sup>  | 1.32 (1.24-1.41) | 10.0%                                               |
|                 |               | rs2237896                 | 11  | 2,858,440      | G           | A            | 0.952 | 1.1x10 <sup>-16</sup>  | 1.32 (1.24-1.41) | 5.0%                                                |
| <i>ZBED3</i>    | rs7732130     | rs7732130                 | 5   | 76,435,004     | G           | A            | 0.278 | 6.4x10 <sup>-10</sup>  | 1.09 (1.06-1.12) | 46.1%                                               |
|                 |               | rs6878122                 | 5   | 76,427,311     | G           | A            | 0.278 | 6.6x10 <sup>-10</sup>  | 1.09 (1.06-1.12) | 44.9%                                               |
|                 |               | rs4457054                 | 5   | 76,425,060     | G           | C            | 0.268 | 7.8x10 <sup>-9</sup>   | 1.09 (1.06-1.12) | 4.2%                                                |
|                 |               | rs7708285                 | 5   | 76,425,867     | G           | A            | 0.268 | 1.1x10 <sup>-8</sup>   | 1.09 (1.06-1.12) | 3.0%                                                |
|                 |               | rs4457053                 | 5   | 76,424,949     | G           | A            | 0.277 | 2.0x10 <sup>-8</sup>   | 1.08 (1.05-1.11) | 1.7%                                                |
| <i>CDKN2A-B</i> | rs10757283    | rs10757283                | 9   | 22,134,172     | T           | C            | 0.437 | 2.8x10 <sup>-19</sup>  | 1.14 (1.11-1.18) | 52.7%                                               |
|                 |               | rs10217762                | 9   | 22,133,645     | C           | T            | 0.435 | 6.7x10 <sup>-19</sup>  | 1.14 (1.11-1.18) | 21.8%                                               |
|                 |               | rs10757282                | 9   | 22,133,984     | C           | T            | 0.436 | 1.3x10 <sup>-18</sup>  | 1.14 (1.11-1.18) | 11.1%                                               |
|                 |               | rs7019437                 | 9   | 22,134,302     | G           | C            | 0.421 | 1.8x10 <sup>-18</sup>  | 1.14 (1.11-1.18) | 8.4%                                                |
|                 |               | rs7019778                 | 9   | 22,134,651     | C           | A            | 0.440 | 2.6x10 <sup>-18</sup>  | 1.14 (1.11-1.17) | 5.8%                                                |
| <i>SLC30A8</i>  | rs13266634    | rs13266634                | 8   | 118,184,783    | C           | T            | 0.676 | 1.3x10 <sup>-18</sup>  | 1.13 (1.10-1.16) | 29.5%                                               |
|                 |               | rs3802177                 | 8   | 118,185,025    | G           | A            | 0.676 | 1.4x10 <sup>-18</sup>  | 1.13 (1.10-1.16) | 25.7%                                               |
|                 |               | rs11558471                | 8   | 118,185,733    | A           | G            | 0.670 | 1.6x10 <sup>-18</sup>  | 1.13 (1.10-1.16) | 24.1%                                               |
|                 |               | rs35859536                | 8   | 118,191,475    | C           | T            | 0.675 | 2.3x10 <sup>-18</sup>  | 1.13 (1.10-1.16) | 16.6%                                               |
|                 |               | rs9650069                 | 8   | 118,204,020    | C           | T            | 0.680 | 1.3x10 <sup>-17</sup>  | 1.13 (1.10-1.16) | 3.1%                                                |
|                 |               | rs4300038                 | 8   | 118,217,915    | G           | A            | 0.677 | 3.9x10 <sup>-17</sup>  | 1.12 (1.09-1.16) | 1.1%                                                |
| <i>CDKN2A-B</i> | rs10811660    | rs10811661                | 9   | 22,134,094     | T           | C            | 0.827 | 3.2x10 <sup>-43</sup>  | 1.32 (1.27-1.37) | 54.5%                                               |
|                 |               | rs10811660                | 9   | 22,134,068     | G           | A            | 0.830 | 7.0x10 <sup>-43</sup>  | 1.32 (1.27-1.37) | 24.1%                                               |
|                 |               | rs10965246                | 9   | 22,132,698     | T           | C            | 0.823 | 2.3x10 <sup>-42</sup>  | 1.32 (1.27-1.37) | 8.2%                                                |
|                 |               | rs10965248                | 9   | 22,132,878     | T           | C            | 0.823 | 2.5x10 <sup>-42</sup>  | 1.32 (1.26-1.37) | 7.1%                                                |
|                 |               | rs10965250                | 9   | 22,133,284     | G           | A            | 0.829 | 4.9x10 <sup>-42</sup>  | 1.31 (1.26-1.37) | 3.8%                                                |
|                 |               | rs10965247                | 9   | 22,132,729     | A           | G            | 0.823 | 1.4x10 <sup>-41</sup>  | 1.31 (1.26-1.37) | 1.3%                                                |



|               |                |                 |    |            |       |                      |                  |                       |                  |       |
|---------------|----------------|-----------------|----|------------|-------|----------------------|------------------|-----------------------|------------------|-------|
| <i>HNF1B</i>  | rs4430796      | rs4430796       | 17 | 36,098,040 | G     | A                    | 0.455            | $6.3 \times 10^{-12}$ | 1.09 (1.07-1.12) | 31.3% |
|               |                | rs11651052      | 17 | 36,102,381 | A     | G                    | 0.449            | $1.1 \times 10^{-11}$ | 1.09 (1.06-1.12) | 19.6% |
|               |                | rs8064454       | 17 | 36,101,586 | A     | C                    | 0.450            | $1.2 \times 10^{-11}$ | 1.09 (1.06-1.12) | 16.5% |
|               |                | rs11263763      | 17 | 36,103,565 | G     | A                    | 0.450            | $1.5 \times 10^{-11}$ | 1.09 (1.06-1.12) | 13.2% |
|               |                | rs11263761      | 17 | 36,097,775 | G     | A                    | 0.465            | $1.9 \times 10^{-11}$ | 1.09 (1.06-1.12) | 10.5% |
|               |                | rs11651755      | 17 | 36,099,840 | C     | T                    | 0.462            | $3.3 \times 10^{-11}$ | 1.09 (1.06-1.12) | 6.2%  |
|               |                | rs10908278      | 17 | 36,099,952 | T     | A                    | 0.443            | $9.3 \times 10^{-11}$ | 1.09 (1.06-1.12) | 2.3%  |
| <i>CDKAL1</i> | rs35261542     | rs35261542      | 6  | 20,675,792 | A     | C                    | 0.280            | $9.6 \times 10^{-23}$ | 1.15 (1.12-1.18) | 24.8% |
|               |                | rs9368222       | 6  | 20,686,996 | A     | C                    | 0.280            | $1.1 \times 10^{-22}$ | 1.15 (1.12-1.18) | 21.6% |
|               |                | rs7451008       | 6  | 20,673,880 | C     | T                    | 0.280            | $1.6 \times 10^{-22}$ | 1.15 (1.12-1.18) | 15.9% |
|               |                | chr6:20676414:I | 6  | 20,676,414 | I     | R                    | 0.283            | $2.2 \times 10^{-22}$ | 1.15 (1.11-1.19) | 11.8% |
|               |                | rs9348441       | 6  | 20,680,678 | A     | T                    | 0.279            | $2.8 \times 10^{-22}$ | 1.15 (1.11-1.18) | 9.0%  |
|               |                | rs7756992       | 6  | 20,679,709 | G     | A                    | 0.284            | $3.2 \times 10^{-22}$ | 1.14 (1.11-1.18) | 7.9%  |
|               |                | rs7766070       | 6  | 20,686,573 | A     | C                    | 0.282            | $3.8 \times 10^{-22}$ | 1.14 (1.11-1.18) | 6.4%  |
|               |                | rs6931514       | 6  | 20,703,952 | A     | C                    | 0.280            | $1.1 \times 10^{-22}$ | 1.15 (1.12-1.18) | 2.0%  |
| <i>GLIS3</i>  | chr9:4294707:I | chr9:4294707:I  | 9  | 4,294,707  | I     | R                    | 0.360            | $6.5 \times 10^{-8}$  | 1.07 (1.05-1.10) | 56.3% |
|               |                | rs10974438      | 9  | 4,291,928  | C     | A                    | 0.360            | $1.6 \times 10^{-7}$  | 1.07 (1.04-1.10) | 23.5% |
|               |                | rs6476839       | 9  | 4,290,823  | T     | A                    | 0.418            | $9.5 \times 10^{-7}$  | 1.07 (1.04-1.09) | 4.1%  |
|               |                | rs10116772      | 9  | 4,290,541  | A     | C                    | 0.417            | $9.6 \times 10^{-7}$  | 1.07 (1.04-1.09) | 4.0%  |
|               |                | rs4237150       | 9  | 4,290,085  | C     | G                    | 0.418            | $1.0 \times 10^{-6}$  | 1.07 (1.04-1.09) | 3.9%  |
|               |                | rs10758593      | 9  | 4,292,083  | A     | G                    | 0.415            | $1.1 \times 10^{-6}$  | 1.06 (1.04-1.09) | 3.6%  |
|               |                | rs1574285       | 9  | 4,283,137  | G     | T                    | 0.413            | $2.4 \times 10^{-6}$  | 1.06 (1.04-1.09) | 1.7%  |
|               |                | rs10758594      | 9  | 4,295,583  | A     | G                    | 0.433            | $5.0 \times 10^{-6}$  | 1.06 (1.03-1.09) | 0.8%  |
|               |                | rs35338539      | 9  | 4,298,589  | A     | G                    | 0.355            | $5.7 \times 10^{-6}$  | 1.06 (1.04-1.09) | 0.8%  |
| rs10814915    | 9              | 4,290,544       | T  | C          | 0.434 | $8.4 \times 10^{-6}$ | 1.06 (1.03-1.09) | 0.5%                  |                  |       |

Association summary statistics and credible set construction are based on the meta-analysis of Metabochip studies in 27,206 cases and 57,574 controls of European ancestry. In loci with multiple signals of association, results are presented from exact conditional analysis after adjusting for all other index variants in the fine-mapping region. In loci with a single signal of association, results are presented from unconditional analysis.

Chr: chromosome. RAF: risk allele frequency. OR: odds-ratio for risk allele. CI: confidence interval.

**Supplementary Table 10. Coding variants attaining at least 5% posterior probability ( $\pi_c$ ) of driving association signals across fine-mapping regions.**

| Locus               | Index variant for association signal | Coding variant | Gene           | Substitution | Chr | Position (b37) | Risk allele | Other allele | RAF   | p-value               | OR (95% CI)      | Posterior probability ( $\pi_c$ ) |
|---------------------|--------------------------------------|----------------|----------------|--------------|-----|----------------|-------------|--------------|-------|-----------------------|------------------|-----------------------------------|
| <i>HNF4A</i>        | rs1800961                            | rs1800961      | <i>HNF4A</i>   | p.T139I      | 20  | 43,042,364     | T           | C            | 0.034 | 7.1x10 <sup>-6</sup>  | 1.16 (1.09-1.24) | 97.4%                             |
| <i>HNF1A</i>        | rs1169288                            | rs1169288      | <i>HNF1A</i>   | p.I27L       | 12  | 121,416,650    | C           | A            | 0.334 | 9.4x10 <sup>-9</sup>  | 1.09 (1.06-1.12) | 75.5%                             |
| <i>HNF1A</i>        | rs1800574                            | rs1800574      | <i>HNF1A</i>   | p.A98V       | 12  | 121,416,864    | T           | C            | 0.027 | 5.4x10 <sup>-6</sup>  | 1.21 (1.11-1.31) | 34.0%                             |
| <i>SLC30A8</i>      | rs13266634                           | rs13266634     | <i>SLC30A8</i> | p.R325W      | 8   | 118,184,783    | C           | T            | 0.676 | 1.3x10 <sup>-18</sup> | 1.13 (1.10-1.16) | 29.5%                             |
| <i>KCNJ11-ABCC8</i> | rs5215                               | rs5215         | <i>KCNJ11</i>  | p.V337I      | 11  | 17,408,630     | C           | T            | 0.389 | 1.5x10 <sup>-10</sup> | 1.09 (1.06-1.11) | 15.1%                             |
| <i>KCNJ11-ABCC8</i> | rs5215                               | rs5219         | <i>KCNJ11</i>  | p.E23K       | 11  | 17,409,572     | T           | C            | 0.389 | 1.8x10 <sup>-10</sup> | 1.09 (1.06-1.11) | 12.9%                             |
| <i>KCNJ11-ABCC8</i> | rs5215                               | rs757110       | <i>ABCC8</i>   | p.A1369S     | 11  | 17,418,477     | C           | A            | 0.389 | 2.5x10 <sup>-10</sup> | 1.09 (1.06-1.11) | 9.0%                              |
| <i>GCKR</i>         | rs780094                             | rs1260326      | <i>GCKR</i>    | p.P446L      | 2   | 27,730,940     | C           | T            | 0.605 | 3.7x10 <sup>-9</sup>  | 1.08 (1.05-1.11) | 5.5%                              |
| <i>PPARG</i>        | rs11712037                           | rs1801282      | <i>PPARG</i>   | p.P12A       | 3   | 12,393,125     | C           | G            | 0.862 | 8.0x10 <sup>-8</sup>  | 1.11 (1.07-1.15) | 5.2%                              |

Association summary statistics are based on the meta-analysis of Metabochip studies in 27,206 cases and 57,574 controls of European ancestry. In loci with multiple signals of association, results are presented from exact conditional analysis after adjusting for all other index variants in the fine-mapping region.

In loci with a single signal of association, results are presented from unconditional analysis.

Chr: chromosome. RAF: risk allele frequency. OR: odds-ratio for risk allele. CI: confidence interval.

**Supplementary Table 11. DNA-binding regulatory protein ChIP-seq data.**

---

|         |        |       |          |          |         |
|---------|--------|-------|----------|----------|---------|
| ARID3A  | EGR1   | HDAC8 | NFATC1   | RFX5     | TAL1    |
| ATF1    | ELF1   | HMGN3 | NFE2     | RPC155   | TBL1XR1 |
| ATF2    | ELK1   | HNF4A | NFIC     | RUNX3    | TBP     |
| ATF3    | ELK4   | HNF4G | NFYA     | RXRA     | TCF12   |
| BACH1   | EP300  | HSF1  | NFYB     | SAP30    | TCF3    |
| BATF    | ESR1   | IKZF1 | NKX2.2   | SETDB1   | TCF7L2  |
| BCL11A  | ESRRA  | IRF1  | NKX6_1   | SIN3A    | TEAD4   |
| BCL3    | ETS1   | IRF3  | NR2C2    | SIN3AK20 | TFAP2A  |
| BCLAF1  | EZH2   | IRF4  | NR2F2    | SIRT6    | TFAP2C  |
| BDP1    | FAM48A | JUN   | NR3C1    | SIX5     | THAP1   |
| BHLHE40 | FOS    | JUNB  | NRF1     | SMARCA4  | TRIM28  |
| BRCA1   | FOSL1  | JUND  | PAX5     | SMARCB1  | UBTF    |
| BRF1    | FOSL2  | KAP1  | PBX3     | SMARCC1  | USF1    |
| BRF2    | FOXA1  | KDM5A | PDX1     | SMARCC2  | USF2    |
| CBX3    | FOXA2  | KDM5B | PHF8     | SMC3     | WRNIP1  |
| CCNT2   | FOXM1  | MAFB  | PML      | SP1      | YY1     |
| CEBPB   | FOXP2  | MAFF  | POLR2A   | SP2      | ZBTB33  |
| CEBPD   | GABPA  | MAFK  | POLR3G   | SP4      | ZBTB7A  |
| CHD1    | GATA1  | MAX   | POU2F2   | SPI1     | ZEB1    |
| CHD2    | GATA2  | MAZ   | POU5F1   | SREBP1   | ZKSCAN1 |
| CREB1   | GATA3  | MBD4  | PPARGC1A | SRF      | ZNF143  |
| CTBP2   | GRp20  | MEF2A | PRDM1    | STAT1    | ZNF217  |
| CTCF    | GTF2B  | MEF2C | RAD21    | STAT2    | ZNF263  |
| CTCF1   | GTF2F1 | MTA3  | RBBP5    | STAT3    | ZNF274  |
| E2F1    | GTF3C2 | MXI1  | RCOR1    | STAT5A   | ZZZ3    |
| E2F4    | HDAC1  | MYBL2 | RDBP     | SUZ12    |         |
| E2F6    | HDAC2  | MYC   | RELA     | TAF1     |         |
| EBF1    | HDAC6  | NANOG | REST     | TAF7     |         |

---

**Supplementary Table 12. Credible set variants in FOXA2 sites.**

| Variant        | Chr | Position (b37) | Alleles |       | Association signal |                |                       | Chromatin State                |
|----------------|-----|----------------|---------|-------|--------------------|----------------|-----------------------|--------------------------------|
|                |     |                | Risk    | Other | Locus              | Index variant  | Posterior probability |                                |
| rs17186372     | 1   | 120,500,951    | C       | G     | <i>NOTCH2</i>      | rs41463147     | 0.01114               | HepG2-Enhancer                 |
| rs78681698     | 2   | 43,598,160     | A       | G     | <i>THADA</i>       | rs77981966     | 0.00150               | Islet-Enhancer, HepG2-Enhancer |
| rs57696714     | 2   | 43,626,521     | T       | C     | <i>THADA</i>       | rs77981966     | 0.00351               | Islet-Enhancer, HepG2-Enhancer |
| rs17406646     | 2   | 43,678,617     | C       | T     | <i>THADA</i>       | rs77981966     | 0.00072               | HepG2-Enhancer                 |
| rs7599781      | 2   | 43,678,726     | T       | C     | <i>THADA</i>       | rs77981966     | 0.00022               | HepG2-Enhancer                 |
| rs12105626     | 2   | 43,678,759     | C       | G     | <i>THADA</i>       | rs77981966     | 0.00026               | HepG2-Enhancer                 |
| rs17030845     | 2   | 43,687,879     | C       | T     | <i>THADA</i>       | rs77981966     | 0.00079               | Islet-Enhancer, HepG2-Enhancer |
| chr2:43839773  | 2   | 43,839,773     | C       | CT    | <i>THADA</i>       | rs77981966     | 0.00054               | -                              |
| rs243018       | 2   | 60,586,707     | C       | G     | <i>BCL11A</i>      | rs243020       | 0.06484               | Islet-Enhancer                 |
| chr2:165545373 | 2   | 165,545,373    | C       | CAA   | <i>GRB14</i>       | chr2:165501927 | 0.00199               | Islet-Enhancer                 |
| rs75297654     | 2   | 165,545,615    | C       | T     | <i>GRB14</i>       | chr2:165501927 | 0.07833               | Islet-Enhancer                 |
| rs4234731      | 4   | 6,299,914      | A       | G     | <i>WFS1</i>        | rs10937721     | 0.01888               | Islet-Enhancer                 |
| rs7732130      | 5   | 76,435,004     | G       | A     | <i>ZBED3</i>       | rs7732130      | 0.46107               | Islet-Enhancer                 |
| rs10950521     | 7   | 14,429,350     | C       | T     | <i>DGKB</i>        | rs1974620      | 0.00003               | Islet-Enhancer                 |
|                |     |                |         |       | <i>DGKB</i>        | rs10276674     | 0.00100               |                                |
| rs17668488     | 7   | 14,727,413     | T       | C     | <i>DGKB</i>        | rs10276674     | 0.00006               | Islet-Enhancer                 |
| rs62448646     | 7   | 15,055,948     | A       | T     | <i>DGKB</i>        | rs10276674     | 0.00009               | -                              |
| rs7798360      | 7   | 15,055,972     | A       | G     | <i>DGKB</i>        | rs1974620      | 0.00334               | -                              |
|                |     |                |         |       | <i>DGKB</i>        | rs10276674     | 0.00005               |                                |
| rs849133       | 7   | 28,192,280     | C       | T     | <i>JAZF1</i>       | rs1513272      | 0.04169               | Islet-Enhancer                 |
| rs13266634     | 8   | 118,184,783    | C       | T     | <i>SLC30A8</i>     | rs13266634     | 0.29460               | Islet-Enhancer                 |
| rs4237150      | 9   | 4,290,085      | G       | C     | <i>GLIS3</i>       | chr9:4294707   | 0.03875               | Islet-Enhancer                 |
| rs10757282     | 9   | 22,133,984     | T       | C     | <i>CDKN2B</i>      | rs10757283     | 0.11109               | Islet-Enhancer                 |

|             |    |             |   |   |               |            |         |                                |
|-------------|----|-------------|---|---|---------------|------------|---------|--------------------------------|
| rs10811660  | 9  | 22,134,068  | G | A | <i>CDKN2B</i> | rs10811660 | 0.24144 | Islet-Enhancer                 |
| rs10811661  | 9  | 22,134,094  | T | C | <i>CDKN2B</i> | rs10811660 | 0.54511 | Islet-Enhancer                 |
| rs11257655  | 10 | 12,307,894  | C | T | <i>CDC123</i> | rs11257658 | 0.21096 | Islet-Enhancer, HepG2-Enhancer |
| rs7903146   | 10 | 114,758,349 | C | T | <i>TCF7L2</i> | rs7903146  | 0.77648 | Islet-Enhancer                 |
| rs149039886 | 11 | 2,677,676   | T | C | <i>KCNQ1</i>  | rs458069   | 0.00043 | Islet-Enhancer                 |
|             |    |             |   |   | <i>KCNQ1</i>  | rs2237895  | 0.00001 |                                |
|             |    |             |   |   | <i>KCNQ1</i>  | rs2283220  | 0.00032 |                                |
| rs117134350 | 11 | 2,682,645   | T | C | <i>KCNQ1</i>  | rs2283220  | 0.00030 | -                              |
|             |    |             |   |   | <i>KCNQ1</i>  | rs458069   | 0.00037 |                                |
| rs144222135 | 11 | 2,750,055   | G | A | <i>KCNQ1</i>  | rs2237895  | 0.00002 | HepG2-Enhancer                 |
|             |    |             |   |   | <i>KCNQ1</i>  | rs2283220  | 0.00044 |                                |
|             |    |             |   |   | <i>KCNQ1</i>  | rs458069   | 0.00065 |                                |
| rs231908    | 11 | 2,751,660   | A | G | <i>KCNQ1</i>  | rs458069   | 0.00015 | HepG2-Enhancer                 |
| rs231907    | 11 | 2,752,130   | A | T | <i>KCNQ1</i>  | rs2283220  | 0.03136 | HepG2-Enhancer                 |
|             |    |             |   |   | <i>KCNQ1</i>  | rs2237895  | 0.00002 |                                |
|             |    |             |   |   | <i>KCNQ1</i>  | rs458069   | 0.00085 |                                |
| rs78688069  | 11 | 2,752,183   | C | A | <i>KCNQ1</i>  | rs2237895  | 0.00004 | HepG2-Enhancer                 |
|             |    |             |   |   | <i>KCNQ1</i>  | rs2283220  | 0.00018 |                                |
|             |    |             |   |   | <i>KCNQ1</i>  | rs458069   | 0.00057 |                                |
| rs74949850  | 11 | 2,752,203   | G | A | <i>KCNQ1</i>  | rs458069   | 0.00023 | -                              |
|             |    |             |   |   | <i>KCNQ1</i>  | rs2283220  | 0.00019 |                                |
| rs183123047 | 11 | 2,763,764   | C | T | <i>KCNQ1</i>  | rs458069   | 0.00049 | Islet-Enhancer                 |
|             |    |             |   |   | <i>KCNQ1</i>  | rs2237895  | 0.00002 |                                |
|             |    |             |   |   | <i>KCNQ1</i>  | rs2283220  | 0.00056 |                                |
| rs188455984 | 11 | 2,763,765   | G | A | <i>KCNQ1</i>  | rs458069   | 0.00049 | Islet-Enhancer                 |
|             |    |             |   |   | <i>KCNQ1</i>  | rs2237895  | 0.00002 |                                |
|             |    |             |   |   | <i>KCNQ1</i>  | rs2283220  | 0.00040 |                                |

|               |    |             |   |    |               |                 |         |                                |
|---------------|----|-------------|---|----|---------------|-----------------|---------|--------------------------------|
| rs231878      | 11 | 2,763,777   | G | A  | <i>KCNQ1</i>  | rs458069        | 0.00013 | Islet-Enhancer                 |
| rs147561312   | 11 | 2,763,990   | G | A  | <i>KCNQ1</i>  | rs458069        | 0.00026 | Islet-Enhancer                 |
|               |    |             |   |    | <i>KCNQ1</i>  | rs2283220       | 0.00021 |                                |
| chr11:2809814 | 11 | 2,809,814   | C | CT | <i>KCNQ1</i>  | rs2283220       | 0.00005 | Islet-Enhancer                 |
|               |    |             |   |    | <i>KCNQ1</i>  | rs458069        | 0.00011 |                                |
| rs190728714   | 11 | 2,813,084   | G | C  | <i>KCNQ1</i>  | rs458069        | 0.00042 | Islet-Enhancer                 |
|               |    |             |   |    | <i>KCNQ1</i>  | rs2237895       | 0.00001 |                                |
|               |    |             |   |    | <i>KCNQ1</i>  | rs2283220       | 0.00035 |                                |
| rs140718439   | 11 | 2,860,956   | A | G  | <i>KCNQ1</i>  | rs2283220       | 0.00068 | Islet-Enhancer                 |
|               |    |             |   |    | <i>KCNQ1</i>  | rs2237895       | 0.00002 |                                |
|               |    |             |   |    | <i>KCNQ1</i>  | rs458069        | 0.00179 |                                |
| rs77919905    | 11 | 2,861,068   | G | A  | <i>KCNQ1</i>  | rs458069        | 0.00046 | Islet-Enhancer                 |
|               |    |             |   |    | <i>KCNQ1</i>  | rs2237895       | 0.00001 |                                |
|               |    |             |   |    | <i>KCNQ1</i>  | rs2283220       | 0.00034 |                                |
| rs117678333   | 11 | 2,898,713   | G | A  | <i>KCNQ1</i>  | rs2283220       | 0.00017 | Islet-Enhancer                 |
| rs116358948   | 11 | 2,898,719   | G | A  | <i>KCNQ1</i>  | rs458069        | 0.00052 | Islet-Enhancer                 |
|               |    |             |   |    | <i>KCNQ1</i>  | rs2283220       | 0.00034 |                                |
| rs5213        | 11 | 17,408,404  | C | T  | <i>KCNJ11</i> | rs5215          | 0.13417 | Islet-Enhancer                 |
| rs10830963    | 11 | 92,708,710  | C | G  | <i>MTNR1B</i> | rs10830963      | 0.99833 | Islet-Enhancer, HepG2-Enhancer |
| rs188713963   | 12 | 121,263,372 | G | A  | <i>HNF1A</i>  | chr12:121440833 | 0.00020 | Islet-Enhancer, HepG2-Enhancer |
|               |    |             |   |    | <i>HNF1A</i>  | rs1800574       | 0.00004 |                                |
| rs1169285     | 12 | 121,419,540 | C | T  | <i>HNF1A</i>  | chr12:121440833 | 0.00016 | Islet-Enhancer, HepG2-Enhancer |
|               |    |             |   |    | <i>HNF1A</i>  | rs1800574       | 0.00005 |                                |
| rs148507926   | 12 | 121,420,417 | C | T  | <i>HNF1A</i>  | chr12:121440833 | 0.00025 | Islet-Enhancer, HepG2-Enhancer |
|               |    |             |   |    | <i>HNF1A</i>  | rs1800574       | 0.00005 |                                |
| rs1169282     | 12 | 121,420,430 | C | T  | <i>HNF1A</i>  | chr12:121440833 | 0.00008 | Islet-Enhancer, HepG2-Enhancer |

|             |    |             |   |   |               |                 |         |                                |
|-------------|----|-------------|---|---|---------------|-----------------|---------|--------------------------------|
| rs55660034  | 12 | 121,422,243 | G | A | <i>HNF1A</i>  | chr12:121440833 | 0.00031 | Islet-Enhancer, HepG2-Enhancer |
|             |    |             |   |   | <i>HNF1A</i>  | rs1800574       | 0.00007 |                                |
| rs80137384  | 12 | 121,461,798 | C | T | <i>HNF1A</i>  | rs1800574       | 0.00004 | HepG2-Enhancer                 |
|             |    |             |   |   | <i>HNF1A</i>  | chr12:121440833 | 0.00021 |                                |
| rs151238175 | 15 | 62,171,475  | G | A | <i>C2CD4B</i> | rs138692931     | 0.00043 | Islet-Enhancer, HepG2-Enhancer |
| rs1981916   | 15 | 62,171,479  | T | C | <i>C2CD4B</i> | rs138692931     | 0.00009 | Islet-Enhancer, HepG2-Enhancer |
| rs1364809   | 15 | 62,172,398  | G | C | <i>C2CD4B</i> | rs138692931     | 0.00020 | Islet-Enhancer, HepG2-Enhancer |
| rs2414755   | 15 | 62,172,429  | C | T | <i>C2CD4B</i> | rs138692931     | 0.00010 | Islet-Enhancer, HepG2-Enhancer |
| rs182222907 | 15 | 62,172,558  | G | A | <i>C2CD4B</i> | rs138692931     | 0.00062 | Islet-Enhancer, HepG2-Enhancer |
| rs12441358  | 15 | 62,199,911  | T | A | <i>C2CD4B</i> | rs138692931     | 0.00021 | HepG2-Enhancer                 |
| rs184969901 | 15 | 62,199,939  | G | A | <i>C2CD4B</i> | rs138692931     | 0.00052 | HepG2-Enhancer                 |
| rs17271256  | 15 | 62,228,592  | A | G | <i>C2CD4B</i> | rs138692931     | 0.00025 | Islet-Enhancer                 |
| rs188586648 | 15 | 62,228,616  | C | T | <i>C2CD4B</i> | rs138692931     | 0.00042 | Islet-Enhancer                 |
| rs11071641  | 15 | 62,228,696  | G | C | <i>C2CD4B</i> | rs138692931     | 0.00011 | Islet-Enhancer                 |
| rs35523559  | 15 | 62,228,770  | A | C | <i>C2CD4B</i> | rs138692931     | 0.00010 | Islet-Enhancer                 |
| rs192210296 | 15 | 62,267,155  | T | C | <i>C2CD4B</i> | rs138692931     | 0.00045 | Islet-Enhancer                 |
| rs10519156  | 15 | 62,375,798  | T | A | <i>C2CD4B</i> | rs138692931     | 0.00011 | Islet-Enhancer                 |
| rs7177711   | 15 | 62,379,971  | A | G | <i>C2CD4B</i> | rs138692931     | 0.00012 | Islet-Enhancer                 |
| rs181017166 | 15 | 62,380,027  | C | T | <i>C2CD4B</i> | rs138692931     | 0.00131 | Islet-Enhancer                 |
| rs7178540   | 15 | 62,380,132  | G | A | <i>C2CD4B</i> | rs138692931     | 0.00012 | Islet-Enhancer                 |
| rs17205498  | 15 | 62,405,255  | G | A | <i>C2CD4B</i> | rs138692931     | 0.00020 | Islet-Enhancer                 |
| rs17271521  | 15 | 62,437,363  | T | A | <i>C2CD4B</i> | rs138692931     | 0.00012 | Islet-Enhancer                 |
| rs8038542   | 15 | 62,437,453  | T | C | <i>C2CD4B</i> | rs138692931     | 0.00012 | Islet-Enhancer                 |
| rs77058171  | 15 | 62,437,471  | T | C | <i>C2CD4B</i> | rs138692931     | 0.00028 | Islet-Enhancer                 |
| rs184547776 | 15 | 62,460,046  | C | T | <i>C2CD4B</i> | rs138692931     | 0.00104 | Islet-Enhancer                 |
| rs189010722 | 15 | 62,503,693  | G | C | <i>C2CD4B</i> | rs138692931     | 0.00044 | HepG2-Enhancer                 |
| rs181325342 | 15 | 62,503,735  | C | G | <i>C2CD4B</i> | rs138692931     | 0.00044 | HepG2-Enhancer                 |

|                |    |            |      |    |              |            |         |                                |
|----------------|----|------------|------|----|--------------|------------|---------|--------------------------------|
| rs9939973      | 16 | 53,800,568 | G    | A  | <i>FTO</i>   | rs9927317  | 0.02503 | Islet-Enhancer, HepG2-Enhancer |
| rs9940646      | 16 | 53,800,629 | C    | G  | <i>FTO</i>   | rs9927317  | 0.02523 | Islet-Enhancer, HepG2-Enhancer |
| rs9940128      | 16 | 53,800,754 | G    | A  | <i>FTO</i>   | rs9927317  | 0.02668 | Islet-Enhancer, HepG2-Enhancer |
| rs10401969     | 19 | 19,407,718 | T    | C  | <i>CILP2</i> | rs72999033 | 0.01314 | Islet-Enhancer                 |
| rs60500622     | 19 | 46,161,305 | G    | T  | <i>GIPR</i>  | rs4399645  | 0.00257 | Islet-Enhancer, HepG2-Enhancer |
| rs8104845      | 19 | 46,161,326 | A    | G  | <i>GIPR</i>  | rs4399645  | 0.00015 | Islet-Enhancer, HepG2-Enhancer |
|                |    |            |      |    | <i>GIPR</i>  | rs2238689  | 0.00280 |                                |
| chr19:46172396 | 19 | 46,172,396 | T    | TG | <i>GIPR</i>  | rs4399645  | 0.00006 | -                              |
| rs182357861    | 19 | 46,184,783 | A    | C  | <i>GIPR</i>  | rs4399645  | 0.00009 | Islet-Enhancer, HepG2-Enhancer |
| rs113815244    | 19 | 46,220,716 | G    | A  | <i>GIPR</i>  | rs4399645  | 0.00007 | -                              |
| rs76353548     | 19 | 46,224,089 | G    | T  | <i>GIPR</i>  | rs4399645  | 0.00012 | HepG2-Enhancer                 |
| rs35732815     | 19 | 46,224,156 | A    | G  | <i>GIPR</i>  | rs4399645  | 0.00011 | HepG2-Enhancer                 |
| rs148507178    | 19 | 46,224,166 | C    | A  | <i>GIPR</i>  | rs4399645  | 0.00006 | HepG2-Enhancer                 |
| rs182144573    | 19 | 46,283,781 | C    | T  | <i>GIPR</i>  | rs4399645  | 0.00016 | Islet-Enhancer, HepG2-Enhancer |
| rs183752479    | 19 | 46,384,359 | C    | T  | <i>GIPR</i>  | rs4399645  | 0.00013 | Islet-Enhancer, HepG2-Enhancer |
| rs147046831    | 19 | 46,384,600 | C    | T  | <i>GIPR</i>  | rs4399645  | 0.00006 | Islet-Enhancer, HepG2-Enhancer |
| chr19:46398907 | 19 | 46,398,907 | CACA | C  | <i>GIPR</i>  | rs4399645  | 0.00006 | HepG2-Enhancer                 |

Chr: chromosome.



**Supplementary Table 13. FOXA2 site credible set variants disrupting *de novo* motifs.**

| Variant    | Chr | Position (b37) | Association signal |               |                       | Motif prediction <sup>a</sup> |                                                                                       |                                                                                        |
|------------|-----|----------------|--------------------|---------------|-----------------------|-------------------------------|---------------------------------------------------------------------------------------|----------------------------------------------------------------------------------------|
|            |     |                | Locus              | Index variant | Posterior probability | Allele                        | Motif                                                                                 | Top matching <sup>b</sup>                                                              |
| rs10830963 | 11  | 92,708,710     | <i>MTNR1B</i>      | rs10830963    | 0.998                 | G                             |    | TAL1::TCF3, TAL1_known2, Olig2, OLIG1_1, Atoh1, OLIG2_2, NeuroD1, BHLHA15_1            |
| rs7903146  | 10  | 114,758,349    | <i>TCF7L2</i>      | rs7903146     | 0.776                 | T                             |    | NFIL3, NFIL3_1, TEF_3, DBP_2, DBP_4                                                    |
| rs13266634 | 8   | 118,184,783    | <i>SLC30A8</i>     | rs13266634    | 0.295                 | T                             |    | Tcf12, E2A, TCF3_1, MyoD, TFAP4_4, ASCL2_1                                             |
| rs10811660 | 9   | 22,134,068     | <i>CDKN2B</i>      | rs10811660    | 0.241                 | A                             |  | -                                                                                      |
| rs11257655 | 10  | 12,307,894     | <i>CDC123</i>      | rs11257658    | 0.211                 | T                             |  | FOXA1:AR, HDAC2_disc2, FOXD2_2, FOXD3_4, EP300_disc3, FOXP3_2, FOXA1, FOXL1_4, FOXC2_3 |
| rs849133   | 7   | 28,192,280     | <i>JAZF1</i>       | rs1513272     | 0.0417                | T                             |  | Bach1, AP-1, NF-E2, Nrf2, NFE2L2_2, AP1_known8, EP300_disc1                            |

|             |    |            |              |            |         |   |                                                                                      |                                                                                           |
|-------------|----|------------|--------------|------------|---------|---|--------------------------------------------------------------------------------------|-------------------------------------------------------------------------------------------|
| rs231907    | 11 | 2,752,130  | <i>KCNQ1</i> | rs2283220  | 0.0310  | T |   | AMYB                                                                                      |
| rs9940128   | 16 | 53,800,754 | <i>FTO</i>   | rs9927317  | 0.027   | G |   | ETS_known12, ELK3_1, ERF_1, FEV_2, ELK4, ETS_known2, EHF_1, ETV4_2, ETS_known1, ETS_disc2 |
| rs9939973   | 16 | 53,800,568 | <i>FTO</i>   | rs9927317  | 0.025   | G |   | -                                                                                         |
| rs78688069  | 11 | 2,752,183  | <i>KCNQ1</i> | rs458069   | 0.0006  | A |   | -                                                                                         |
| rs190728714 | 11 | 2,813,084  | <i>KCNQ1</i> | rs458069   | 0.00042 | G |   | BCL_disc1, ETS_disc2, Elk1, ETS_known2, ELK3_1, ERF_1, FEV_2, Elk4, ETS_known12, ETV4_2   |
| rs7798360   | 7  | 15,055,972 | <i>DGKB</i>  | rs10276674 | 0.00005 | G |  | RHOXF1_1, RHOXF1_7                                                                        |

<sup>a</sup>Only most disrupted motif prediction reported.

<sup>b</sup>Motifs with  $q$ -value < 0.001, only top 10 matches listed

Chr: chromosome.

**Supplementary Table 14. Genes down-regulated in *Foxa1/2* knock-out mice at FOXA2-enriched signals.**

| <b>Gene</b>     | <b>Locus</b>    | <b>Percent change</b> | <b>p-value</b> |
|-----------------|-----------------|-----------------------|----------------|
| <i>REG4</i>     | <i>NOTCH2</i>   | 1,415.2%              | 0.15           |
| <i>IGF2</i>     | <i>KCNQ1</i>    | 135.3%                | 0.083          |
| <i>SLC30A8</i>  | <i>SLC30A8</i>  | 134.7%                | 0.048          |
| <i>ABCC8</i>    | <i>KCNJ11</i>   | 81.5%                 | 0.22           |
| <i>CAMK1D</i>   | <i>CDC123</i>   | 81.2%                 | 0.13           |
| <i>TCF7L2</i>   | <i>TCF7L2</i>   | 57.2%                 | 0.28           |
| <i>INS</i>      | <i>KCNQ1</i>    | 47.7%                 | 0.89           |
| <i>SLC22A18</i> | <i>KCNQ1</i>    | 45.8%                 | 0.53           |
| <i>KCNJ11</i>   | <i>KCNJ11</i>   | 38.1%                 | 0.30           |
| <i>PBX4</i>     | <i>CILP2</i>    | 37.9%                 | 0.50           |
| <i>PROSER2</i>  | <i>CDC123</i>   | 35.5%                 | 0.31           |
| <i>CARS</i>     | <i>KCNQ1</i>    | 34.6%                 | 0.33           |
| <i>WFS1</i>     | <i>WFS1</i>     | 29.4%                 | 0.57           |
| <i>AGGF1</i>    | <i>ZBED3</i>    | 21.8%                 | 0.39           |
| <i>ETV1</i>     | <i>DGKB</i>     | 19.6%                 | 0.70           |
| <i>RCL1</i>     | <i>GLIS3</i>    | 17.6%                 | 0.58           |
| <i>MTAP</i>     | <i>CDKN2A/B</i> | 10.5%                 | 0.76           |
| <i>GDF1</i>     | <i>CILP2</i>    | 9.9%                  | 0.90           |
| <i>GLIS3</i>    | <i>GLIS3</i>    | 6.8%                  | 0.93           |
| <i>BLOC1S4</i>  | <i>WFS1</i>     | 6.7%                  | 0.94           |
| <i>HSD3B2</i>   | <i>NOTCH2</i>   | 3.7%                  | 0.94           |
| <i>HOMER3</i>   | <i>CILP2</i>    | 0.4%                  | 0.99           |
| <i>NOTCH2</i>   | <i>NOTCH2</i>   | 0.2%                  | 0.99           |
| <i>RFXANK</i>   | <i>CILP2</i>    | 0.2%                  | 0.99           |

**Supplementary Table 15. Comparison of summary statistics for association signals in established T2D susceptibility loci obtained from meta-analysis of Metabochip studies: (i) unconditional; (ii) GCTA joint model using GoDARTS as reference; and (iii) GCTA joint model using FUSION as reference.**

| Locus              | Index variant    | Chr | Position (b37) | Risk allele | Other allele | RAF   | Metabochip unconditional meta-analysis |                        | Metabochip GCTA joint model GoDARTS reference study |                        | Metabochip GCTA joint model FUSION reference study |                        |
|--------------------|------------------|-----|----------------|-------------|--------------|-------|----------------------------------------|------------------------|-----------------------------------------------------|------------------------|----------------------------------------------------|------------------------|
|                    |                  |     |                |             |              |       | OR (95% CI)                            | p-value                | OR (95% CI)                                         | p <sub>i</sub>         | OR (95% CI)                                        | p <sub>i</sub>         |
| <i>PROX1</i>       | rs340874         | 1   | 214,159,256    | C           | T            | 0.520 | 1.07 (1.04-1.10)                       | 1.1x10 <sup>-7</sup>   | 1.07 (1.04-1.10)                                    | 1.1x10 <sup>-7</sup>   | 1.07 (1.04-1.10)                                   | 1.1x10 <sup>-7</sup>   |
| <i>GCKR</i>        | rs780094         | 2   | 27,741,237     | C           | T            | 0.611 | 1.08 (1.06-1.11)                       | 8.5x10 <sup>-10</sup>  | 1.08 (1.05-1.11)                                    | 1.6x10 <sup>-9</sup>   | 1.08 (1.06-1.11)                                   | 8.7x10 <sup>-10</sup>  |
| <i>THADA</i>       | rs77981966       | 2   | 43,777,964     | C           | T            | 0.934 | 1.20 (1.13-1.26)                       | 1.7x10 <sup>-11</sup>  | 1.19 (1.13-1.26)                                    | 1.7x10 <sup>-11</sup>  | 1.19 (1.13-1.26)                                   | 1.8x10 <sup>-11</sup>  |
| <i>BCL11A</i>      | rs243020         | 2   | 60,585,028     | G           | A            | 0.462 | 1.06 (1.04-1.09)                       | 2.5x10 <sup>-6</sup>   | 1.06 (1.03-1.09)                                    | 4.6x10 <sup>-6</sup>   | 1.06 (1.04-1.09)                                   | 2.5x10 <sup>-6</sup>   |
| <i>GRB14-COBL1</i> | rs75297654       | 2   | 165,545,615    | C           | T            | 0.876 | 1.16 (1.11-1.20)                       | 8.9x10 <sup>-14</sup>  | 1.16 (1.11-1.20)                                    | 9.2x10 <sup>-14</sup>  | 1.16 (1.11-1.20)                                   | 9.2x10 <sup>-14</sup>  |
| <i>IRS1</i>        | rs2972156        | 2   | 227,117,778    | G           | C            | 0.621 | 1.11 (1.08-1.14)                       | 1.3x10 <sup>-15</sup>  | 1.11 (1.08-1.14)                                    | 1.4x10 <sup>-15</sup>  | 1.11 (1.08-1.14)                                   | 1.4x10 <sup>-15</sup>  |
| <i>PPARG</i>       | rs11712037       | 3   | 12,344,730     | C           | G            | 0.862 | 1.11 (1.07-1.15)                       | 4.6x10 <sup>-8</sup>   | 1.12 (1.08-1.16)                                    | 3.7x10 <sup>-9</sup>   | 1.11 (1.07-1.15)                                   | 4.6x10 <sup>-8</sup>   |
| <i>ADAMTS9</i>     | rs17676309       | 3   | 64,730,121     | C           | T            | 0.590 | 1.07 (1.04-1.10)                       | 1.2x10 <sup>-7</sup>   | 1.07 (1.05-1.10)                                    | 7.5x10 <sup>-8</sup>   | 1.07 (1.04-1.10)                                   | 1.2x10 <sup>-7</sup>   |
| <i>ADCY5</i>       | rs11708067       | 3   | 123,065,778    | A           | G            | 0.786 | 1.12 (1.09-1.16)                       | 1.1x10 <sup>-13</sup>  | 1.11 (1.08-1.15)                                    | 5.1x10 <sup>-12</sup>  | 1.12 (1.09-1.16)                                   | 1.2x10 <sup>-13</sup>  |
| <i>IGF2BP2</i>     | rs35510946       | 3   | 185,518,910    | A           | G            | 0.301 | 1.14 (1.11-1.17)                       | 3.7x10 <sup>-20</sup>  | 1.14 (1.10-1.17)                                    | 3.9x10 <sup>-20</sup>  | 1.14 (1.10-1.17)                                   | 3.9x10 <sup>-20</sup>  |
| <i>WFS1</i>        | rs10937721       | 4   | 6,306,763      | C           | G            | 0.580 | 1.09 (1.06-1.12)                       | 7.6x10 <sup>-11</sup>  | 1.08 (1.05-1.11)                                    | 1.2x10 <sup>-9</sup>   | 1.09 (1.06-1.12)                                   | 7.6x10 <sup>-11</sup>  |
| <i>ZBED3</i>       | rs7732130        | 5   | 76,435,004     | G           | A            | 0.278 | 1.09 (1.06-1.12)                       | 6.4x10 <sup>-10</sup>  | 1.09 (1.06-1.12)                                    | 7.1x10 <sup>-10</sup>  | 1.09 (1.06-1.12)                                   | 6.5x10 <sup>-10</sup>  |
| <i>CDKAL1</i>      | rs35261542       | 6   | 20,675,792     | A           | C            | 0.280 | 1.15 (1.12-1.18)                       | 9.6x10 <sup>-23</sup>  | 1.15 (1.12-1.18)                                    | 2.2x10 <sup>-24</sup>  | 1.15 (1.12-1.18)                                   | 1.0x10 <sup>-22</sup>  |
| <i>DGKB</i>        | rs10276674       | 7   | 14,922,007     | C           | T            | 0.183 | 1.07 (1.04-1.11)                       | 0.000013               | 1.08 (1.04-1.11)                                    | 4.5x10 <sup>-6</sup>   | 1.07 (1.04-1.10)                                   | 0.000042               |
|                    | rs1974620        | 7   | 15,065,467     | T           | C            | 0.519 | 1.06 (1.04-1.09)                       | 9.0x10 <sup>-7</sup>   | 1.06 (1.04-1.09)                                    | 1.6x10 <sup>-6</sup>   | 1.06 (1.04-1.09)                                   | 2.8x10 <sup>-6</sup>   |
| <i>JAZF1</i>       | rs1513272        | 7   | 28,200,097     | C           | T            | 0.518 | 1.09 (1.07-1.12)                       | 3.9x10 <sup>-12</sup>  | 1.10 (1.07-1.12)                                    | 4.8x10 <sup>-13</sup>  | 1.09 (1.07-1.12)                                   | 3.9x10 <sup>-12</sup>  |
| <i>GCK</i>         | rs878521         | 7   | 44,255,643     | A           | G            | 0.235 | 1.10 (1.06-1.13)                       | 1.2x10 <sup>-9</sup>   | 1.10 (1.07-1.13)                                    | 2.6x10 <sup>-10</sup>  | 1.09 (1.06-1.13)                                   | 1.2x10 <sup>-9</sup>   |
| <i>SLC30A8</i>     | rs13266634       | 8   | 118,184,783    | C           | T            | 0.676 | 1.13 (1.10-1.16)                       | 1.3x10 <sup>-18</sup>  | 1.12 (1.09-1.15)                                    | 1.1x10 <sup>-16</sup>  | 1.13 (1.10-1.16)                                   | 1.3x10 <sup>-18</sup>  |
| <i>GLIS3</i>       | chr9:4294707:I   | 9   | 4,294,707      | I           | R            | 0.360 | 1.07 (1.05-1.10)                       | 6.5x10 <sup>-8</sup>   | 1.08 (1.05-1.11)                                    | 1.5x10 <sup>-8</sup>   | 1.07 (1.05-1.10)                                   | 6.4x10 <sup>-8</sup>   |
| <i>CDKN2B</i>      | rs10811660       | 9   | 22,134,068     | G           | A            | 0.830 | 1.21 (1.17-1.25)                       | 9.7x10 <sup>-28</sup>  | 1.32 (1.27-1.38)                                    | 2.4x10 <sup>-44</sup>  | 1.30 (1.25-1.35)                                   | 2.1x10 <sup>-40</sup>  |
|                    | rs10757283       | 9   | 22,134,172     | T           | C            | 0.437 | 1.03 (1.01-1.06)                       | 0.015                  | 1.14 (1.10-1.17)                                    | 7.4x10 <sup>-18</sup>  | 1.12 (1.09-1.16)                                   | 1.2x10 <sup>-15</sup>  |
| <i>CDC123</i>      | rs11257658       | 10  | 12,309,268     | A           | G            | 0.217 | 1.10 (1.07-1.14)                       | 2.9x10 <sup>-10</sup>  | 1.11 (1.08-1.14)                                    | 1.6x10 <sup>-11</sup>  | 1.10 (1.07-1.14)                                   | 2.9x10 <sup>-10</sup>  |
| <i>HHEX</i>        | rs11187140       | 10  | 94,466,910     | G           | A            | 0.632 | 1.11 (1.08-1.14)                       | 1.7x10 <sup>-14</sup>  | 1.10 (1.08-1.13)                                    | 5.5x10 <sup>-14</sup>  | 1.11 (1.08-1.14)                                   | 1.8x10 <sup>-14</sup>  |
| <i>TCF7L2</i>      | rs7903146        | 10  | 114,758,349    | T           | C            | 0.260 | 1.39 (1.35-1.43)                       | 5.8x10 <sup>-120</sup> | 1.38 (1.35-1.42)                                    | 3.1x10 <sup>-117</sup> | 1.39 (1.35-1.43)                                   | 3.2x10 <sup>-119</sup> |
| <i>KCNQ1</i>       | chr11:2692322:D  | 11  | 2,692,322      | D           | R            | 0.374 | 1.08 (1.05-1.11)                       | 2.4x10 <sup>-9</sup>   | 1.08 (1.05-1.10)                                    | 3.5x10 <sup>-8</sup>   | 1.10 (1.07-1.13)                                   | 3.6x10 <sup>-13</sup>  |
|                    | rs2283220        | 11  | 2,755,548      | A           | G            | 0.661 | 1.05 (1.03-1.08)                       | 0.00013                | 1.06 (1.03-1.09)                                    | 0.000016               | 1.05 (1.02-1.08)                                   | 0.00089                |
|                    | rs2237895        | 11  | 2,857,194      | C           | A            | 0.428 | 1.12 (1.09-1.15)                       | 8.7x10 <sup>-19</sup>  | 1.08 (1.05-1.11)                                    | 6.6x10 <sup>-7</sup>   | 1.06 (1.03-1.10)                                   | 0.00019                |
|                    | rs74046911       | 11  | 2,858,636      | C           | T            | 0.951 | 1.32 (1.24-1.40)                       | 2.3x10 <sup>-19</sup>  | 1.32 (1.24-1.40)                                    | 1.7x10 <sup>-17</sup>  | 1.33 (1.24-1.42)                                   | 3.2x10 <sup>-16</sup>  |
|                    | rs458069         | 11  | 2,858,800      | G           | C            | 0.707 | 1.07 (1.04-1.10)                       | 1.0x10 <sup>-6</sup>   | 1.06 (1.03-1.10)                                    | 0.00026                | 1.06 (1.03-1.10)                                   | 0.00059                |
| <i>KCNJ11</i>      | rs5215           | 11  | 17,408,630     | C           | T            | 0.389 | 1.09 (1.06-1.12)                       | 1.5x10 <sup>-10</sup>  | 1.08 (1.05-1.11)                                    | 1.3x10 <sup>-9</sup>   | 1.09 (1.06-1.11)                                   | 1.5x10 <sup>-10</sup>  |
| <i>CENTD2</i>      | chr11:72460930:I | 11  | 72,460,930     | R           | I            | 0.823 | 1.10 (1.07-1.14)                       | 8.8x10 <sup>-9</sup>   | 1.10 (1.06-1.13)                                    | 5.9x10 <sup>-8</sup>   | 1.10 (1.07-1.14)                                   | 8.8x10 <sup>-9</sup>   |
| <i>MTNR1B</i>      | rs10830963       | 11  | 92,708,710     | G           | C            | 0.283 | 1.10 (1.07-1.13)                       | 2.9x10 <sup>-12</sup>  | 1.10 (1.07-1.13)                                    | 7.9x10 <sup>-12</sup>  | 1.10 (1.07-1.13)                                   | 2.9x10 <sup>-12</sup>  |
| <i>HMGA2</i>       | rs2583941        | 12  | 66,204,598     | A           | G            | 0.090 | 1.14 (1.09-1.19)                       | 7.5x10 <sup>-9</sup>   | 1.13 (1.08-1.18)                                    | 6.0x10 <sup>-8</sup>   | 1.14 (1.09-1.18)                                   | 7.5x10 <sup>-9</sup>   |
| <i>TSPAN8</i>      | rs7961581        | 12  | 71,663,102     | C           | T            | 0.265 | 1.07 (1.04-1.10)                       | 1.1x10 <sup>-6</sup>   | 1.07 (1.04-1.10)                                    | 1.4x10 <sup>-6</sup>   | 1.07 (1.04-1.10)                                   | 1.1x10 <sup>-6</sup>   |

|               |                   |    |             |   |   |       |                  |                       |                  |                       |                  |                       |
|---------------|-------------------|----|-------------|---|---|-------|------------------|-----------------------|------------------|-----------------------|------------------|-----------------------|
| <i>HNFB1A</i> | rs1169288         | 12 | 121,416,650 | C | A | 0.334 | 1.06 (1.03-1.09) | 0.000014              | 1.10 (1.07-1.13) | 5.4x10 <sup>-10</sup> | 1.09 (1.06-1.12) | 8.3x10 <sup>-9</sup>  |
|               | rs1800574         | 12 | 121,416,864 | T | C | 0.027 | 1.15 (1.07-1.25) | 0.00039               | 1.21 (1.11-1.31) | 5.2x10 <sup>-6</sup>  | 1.22 (1.12-1.32) | 2.4x10 <sup>-6</sup>  |
|               | chr12:121440833:D | 12 | 121,440,833 | R | D | 0.416 | 1.01 (0.99-1.04) | 0.29                  | 1.06 (1.03-1.09) | 0.000028              | 1.05 (1.02-1.08) | 0.00042               |
| <i>C2CD4B</i> | rs7161785         | 15 | 62,395,224  | G | C | 0.555 | 1.05 (1.02-1.07) | 0.00058               | 1.04 (1.02-1.07) | 0.00068               | 1.05 (1.02-1.07) | 0.00058               |
| <i>PRC1</i>   | rs3803563         | 15 | 91,531,352  | A | C | 0.175 | 1.11 (1.07-1.15) | 3.6x10 <sup>-10</sup> | 1.11 (1.07-1.15) | 2.2x10 <sup>-10</sup> | 1.11 (1.07-1.14) | 3.6x10 <sup>-10</sup> |
| <i>FTO</i>    | rs9927317         | 16 | 53,820,996  | G | C | 0.396 | 1.14 (1.11-1.17) | 1.7x10 <sup>-24</sup> | 1.14 (1.11-1.17) | 6.8x10 <sup>-25</sup> | 1.14 (1.11-1.17) | 1.7x10 <sup>-24</sup> |
| <i>HNFB1B</i> | rs4430796         | 17 | 36,098,040  | G | A | 0.455 | 1.09 (1.07-1.12) | 6.3x10 <sup>-12</sup> | 1.09 (1.07-1.12) | 5.2x10 <sup>-12</sup> | 1.09 (1.07-1.12) | 6.4x10 <sup>-12</sup> |
| <i>MC4R</i>   | chr18:57739289:D  | 18 | 57,739,289  | D | R | 0.234 | 1.06 (1.02-1.09) | 0.00044               | 1.05 (1.02-1.09) | 0.00079               | 1.05 (1.02-1.09) | 0.00086               |
|               | rs17066842        | 18 | 58,040,624  | G | A | 0.961 | 1.13 (1.06-1.21) | 0.00030               | 1.13 (1.06-1.21) | 0.00033               | 1.12 (1.05-1.20) | 0.00059               |
| <i>CILP2</i>  | rs72999033        | 19 | 19,366,632  | T | C | 0.069 | 1.19 (1.14-1.25) | 5.3x10 <sup>-13</sup> | 1.20 (1.15-1.26) | 6.5x10 <sup>-14</sup> | 1.19 (1.14-1.25) | 5.4x10 <sup>-13</sup> |
| <i>GIPR</i>   | rs4399645         | 19 | 46,166,073  | T | C | 0.395 | 1.05 (1.02-1.08) | 0.00030               | 1.07 (1.04-1.10) | 4.4x10 <sup>-7</sup>  | 1.06 (1.04-1.09) | 3.1x10 <sup>-6</sup>  |
|               | rs2238689         | 19 | 46,178,661  | C | T | 0.425 | 1.08 (1.05-1.10) | 1.7x10 <sup>-8</sup>  | 1.09 (1.07-1.12) | 9.7x10 <sup>-12</sup> | 1.09 (1.06-1.12) | 2.1x10 <sup>-10</sup> |
| <i>HNFB4A</i> | rs1800961         | 20 | 43,042,364  | T | C | 0.034 | 1.16 (1.09-1.24) | 7.1x10 <sup>-6</sup>  | 1.16 (1.09-1.24) | 0.000011              | 1.16 (1.09-1.24) | 7.2x10 <sup>-6</sup>  |

Each association signal was represented by an index variant in the GCTA-COJO joint regression model on the basis of: (i) summary statistics from the meta-analysis of MetaboChip studies in 27,206 cases and 57,574 controls of European ancestry; and (ii) reference genotype data from GoDARTS (3,298 cases and 3,708 controls of European ancestry from the UK) or FUSION (4,435 cases and 5,757 controls of European ancestry from Scandinavia) to approximate LD across fine-mapping regions.

Chr: chromosome. RAF: risk allele frequency. OR: odds-ratio for risk allele. CI: confidence interval.

**Supplementary Table 16. Recognition Motifs enriched in FOXA2 ChIP-seq sites.**

| ID | Consensus sequence | Matching known motifs <sup>a,b</sup>                                                                                                                                                                                                                                                                      |
|----|--------------------|-----------------------------------------------------------------------------------------------------------------------------------------------------------------------------------------------------------------------------------------------------------------------------------------------------------|
| 0  | GTAAACA            | FOXA1:AR, HDAC2_disc2, FOXD2_2, FOXD3_4, EP300_disc3, FOXP3_2, FOXA1, FOXL1_4, FOXC2_3, FOXJ2_4, TCF12_disc2, FOXJ3_4, FOXJ3_7, FOXC1_7, FOXB1_4, FOXA_known6, FOXO1_3, FOXO6_2, FOXA_known7, FOXJ3_1, FOXL1_3, Fox:Ebox                                                                                  |
| 1  | CTAAGTAAACA        | FOXA_known6, HDAC2_disc2, EP300_disc3, FOXA1, FOXA_known7, FOXC2_3, FOXD3_4, TCF12_disc2, FOXD2_2, Fox:Ebox, FOXJ3_1, FOXA_known2, FOXO6_2, FOXL1_3, FOXL1_4, FOXC1_1, FOXP3_2                                                                                                                            |
| 2  | TGTTTACTTAGG       | FOXA_known6, FOXA1, HDAC2_disc2, Fox:Ebox, EP300_disc3, FOXA_known7, TCF12_disc2, FOXO6_2, FOXC2_3, FOXD3_4, FOXJ3_1, FOXD2_2, FOXC1_1, FOXB1_4, FOXA_known2, FOXL1_3, FOXL1_4, FOXD1_2, FOXD1                                                                                                            |
| 3  | TCCATGTTTACTTTG    | FOXA1, FOXA_known7, FOXA_known6, EP300_disc3, HDAC2_disc2, FOXC2_3, FOXP1, Fox:Ebox, FOXJ3_1, FOXL1_3, FOXD1_2, FOXD1, FOXB1_4, TCF12_disc2, FOXO3_5, FOXO1_3, FOXL1_1, FOXO6_2, FOXD2_2, FOXD3_4, FOXA_known2, FOXA1:AR, NF1:FOXA1, FOXF2, FOXO4_2, FOXI1_1, FOXJ2_4, FOXL1_4, FOXP3_2, FOXJ3_7, FOXC1_1 |
| 4  | AAAAAGTAAACAAAGAC  | FOXA_known7, FOXJ3_1, FOXL1_3, FOXC2_3, FOXC1_1, FOXO4_2, FOXP1, FOXL1_1, FOXF2, FOXO3_5, FOXD3_4, FOXO6_2, FOXO1_3, FOXB1_4, FOXD2_2, FOXJ2_4, FOXJ3_7, FOXA_known6, FOXD1_2, FOXD1, HDAC2_disc2, FOX_1, FOXJ3_2, FOXL1_4, EP300_disc3                                                                   |
| 5  | AAAAAGTAAACAAACCC  | FOXJ3_1, FOXA_known7, FOXL1_3, FOXF2, FOXC2_3, FOXJ3_7, FOXO4_2, FOXC1_1, FOXJ2_4, FOXO1_3, FOXP1, FOXL1_1, FOXJ3_2, FOXO3_5                                                                                                                                                                              |
| 6  | AAAGTAAACAAAATT    | FOXJ3_1, FOXA_known7, FOXL1_3, FOXC2_3, FOXP1, FOXO4_2, FOXJ2_4, FOXJ3_7, FOXL1_4, FOXO1_3, FOXO1_1                                                                                                                                                                                                       |
| 7  | AAAATGTAAACAAACAG  | FOXL1_3, FOXA_known7, FOXJ3_1, FOXO6_2, FOXC2_3, FOXO4_2, FOXF2, FOXO1_3, FOXJ2_4, FOXJ3_7, FOXO3_5, FOXL1_1, FOXC1_1, FOXJ3_2, FOXB1_4, FOXP1, FOXD1_2, FOXD1, FOXO3_3, FOXO3                                                                                                                            |
| 8  | GTAACAT            | FOXD1_2, FOXD1, FOXO3_5, FOXO1_3, FOXB1_4, FOXO6_2                                                                                                                                                                                                                                                        |
| 9  | TAAATGTAAACAAAGGT  | FOXL1_3, FOXA_known7, FOXJ3_1, FOXC2_3, FOXJ3_7, FOXJ2_4, FOXO1_3, FOXO4_2, FOXL1_1, FOXJ3_2, FOXB1_4, FOXF2, FOXO3_5, FOXP1                                                                                                                                                                              |
| 10 | TGTCAACA           |                                                                                                                                                                                                                                                                                                           |
| 11 | TCCTGTTTACA        | FOXP1, Foxo1, FOXO6_2                                                                                                                                                                                                                                                                                     |
| 12 | AAGTAAACAAA        | FOXP1, FOXO6_2, FOXJ3_1, FOXA_known7, FOXC2_3, FOXL1_3, Foxo1, Fox:Ebox, FOXA_known6                                                                                                                                                                                                                      |
| 13 | CAAACGTAAACAAT     | FOXF2, FOXJ3_1, FOXO1_3, FOXJ2_4, FOXJ3_7, FOXO3_5, FOXO6_2, FOXA_known7, FOXO4_2, FOXL1_3, FOXD1_2, FOXD1, FOXC2_3, FOXJ3_2, FOXL1_4, FOXD2_2, FOXP3_2, FOXO1_1                                                                                                                                          |
| 14 | CAAAGTAAACAAAG     | FOXJ3_1, FOXA_known7, FOXL1_3, FOXO6_2, FOXC2_3, FOXF2, FOXP1, FOXD2_2, FOXJ3_7, FOXJ2_4, FOXO4_2, FOXO1_3, FOXL1_4, FOXP3_2, EP300_disc3, FOXA_known6, HDAC2_disc2, FOXC1_1, FOXJ3_2                                                                                                                     |
| 15 | TGTAAACA           | FOXO3_3, FOXO3                                                                                                                                                                                                                                                                                            |
| 16 | GTTTACTT           | FOXA_known6                                                                                                                                                                                                                                                                                               |
| 17 | TATTGTTTATT        | FOXQ1_2, Foxq1                                                                                                                                                                                                                                                                                            |
| 18 | TGATTGTTAACAGTTGG  |                                                                                                                                                                                                                                                                                                           |

|    |                   |                                                                                                                                                                                                                                                                                                        |
|----|-------------------|--------------------------------------------------------------------------------------------------------------------------------------------------------------------------------------------------------------------------------------------------------------------------------------------------------|
| 19 | GGATGTTTGT        | FOXI1_2, FOXI1, FOXI1_1, FOXD3_1, FOX_1, Foxd3, NF1:FOXA1, FOXL1_1                                                                                                                                                                                                                                     |
| 20 | TGTGTACA          |                                                                                                                                                                                                                                                                                                        |
| 21 | TCCAATCCACA       | Foxh1                                                                                                                                                                                                                                                                                                  |
| 22 | AGGAAA            |                                                                                                                                                                                                                                                                                                        |
| 23 | GTAACAAT          | SRY_3, SRY, SRY_2                                                                                                                                                                                                                                                                                      |
| 24 | GAATGTTTGT        | Foxd3, FOXD3_1, FOX_1, Foxa2, FOXI1_2, FOXI1, FOXI1_1                                                                                                                                                                                                                                                  |
| 25 | TGAGTCAT          | Bach1, AP-1, NF-E2, Nrf2, NFE2L2_2, AP1_known8, EP300_disc1                                                                                                                                                                                                                                            |
| 26 | TGTATATATACC      |                                                                                                                                                                                                                                                                                                        |
| 27 | CTCTGT            |                                                                                                                                                                                                                                                                                                        |
| 28 | CTTTGT            | SOX10                                                                                                                                                                                                                                                                                                  |
| 29 | AGAGTCCAAAGTCCA   | HNf4a, HNF4_known14, HNF4A, HNF4_known1, HNF4_known9, HNF4_known2, HNF4_known13, NR2F1, PPARA_4, HNF4_known21, NR2C2_known1, HNF4_known19, HNF4_known17, TR4, NR2F6_3, RXRA_known7, RXRA_known10, HNF4_known7, RXRA_known12, RXR, PPARG::RXRA, RXRB_1, PPARE, PPARA_3, RXRA_known1, NR1H2::RXRA        |
| 30 | CAAAGTCC          | HNf4a, HNF4_known9, HNF4_known14, HNF4A                                                                                                                                                                                                                                                                |
| 31 | CTGGACTTTGGACTC   | HNf4a, HNF4_known9, HNF4_known14, HNF4A, HNF4_known1, HNF4_known2, HNF4_known13, NR2F1, HNF4_known17, HNF4_known21, PPARA_4, NR2C2_known1, HNF4_known19, TR4, NR2F6_3, RXRA_known7, RXRA_known10, RXRA_known12, RXR, HNF4_known7, PPARA_3, RXRB_1, PPARE, PPARG::RXRA, Erra                            |
| 32 | ACACAG            |                                                                                                                                                                                                                                                                                                        |
| 33 | TACATGTGCACATAAAA |                                                                                                                                                                                                                                                                                                        |
| 34 | CCTCCC            |                                                                                                                                                                                                                                                                                                        |
| 35 | GGTAAGTA          | FOXC1, FOXC1_1                                                                                                                                                                                                                                                                                         |
| 36 | AACAACAACAAGAG    | ZNF35_1                                                                                                                                                                                                                                                                                                |
| 37 | CAGATGTGCACATACGT |                                                                                                                                                                                                                                                                                                        |
| 38 | TATTGCACAAT       | CEBPB_known1                                                                                                                                                                                                                                                                                           |
| 39 | TGACCTTTGAACCT    | HNf4_known2, HNF4_known13, NR2F1, HNF4_known1, HNF4_known14, HNF4A, PPARA_4, NR2C2_known1, HNF4_known9, HNF4a, HNF4_known7, HNF4_known19, NR2F6_3, HNF4_known21, RXRA_known12, TR4, RXRA_known10, RXRB_1, PPARG::RXRA, PPARA_3, NR1H2::RXRA, PPARE, RXRA_known1, RXR, RXRA_known7, Erra, RARA_1, Nur77 |
| 40 | ATACTTA           | NKX3-1_2, NKX3-1, NKX3-1_1                                                                                                                                                                                                                                                                             |
| 41 | CAAAGGTCAGA       | Erra, HNF4_known1                                                                                                                                                                                                                                                                                      |
| 42 | CAGATG            |                                                                                                                                                                                                                                                                                                        |
| 43 | ATTGCACAATA       | CEBPB_known1                                                                                                                                                                                                                                                                                           |
| 44 | TCACGGAACAATAGGTG | SOX7_1, SOX15_1, SOX9_1, SOX18_1, SOX13_1, Sox6, SOX11_1, SOX4_1, SRY_2, SOX9_2, SOX9, SOX17_1                                                                                                                                                                                                         |
| 45 | CTCACACAATGGCGC   |                                                                                                                                                                                                                                                                                                        |
| 46 | GTGGTTCAATAATTTTG |                                                                                                                                                                                                                                                                                                        |
| 47 | TCTCAAAGGTCACCTG  | RARA_1, NR2F2_2, Nur77, HNF4_known1, RARA_8, RXRA_known1, RARB_2, Erra                                                                                                                                                                                                                                 |

|    |                    |                                                                                                                                                                                                                         |
|----|--------------------|-------------------------------------------------------------------------------------------------------------------------------------------------------------------------------------------------------------------------|
| 48 | AATCAACA           |                                                                                                                                                                                                                         |
| 49 | TTACACAA           |                                                                                                                                                                                                                         |
| 50 | TGCAAAAGTCCAATAT   |                                                                                                                                                                                                                         |
| 51 | TCTCAAAGGTCACGAG   | NR2F2_2, RARA_1, Nur77, RARA_8, HNF4_known1, RXRA_known9, RARA_6, RARB_2, RXRA_known1                                                                                                                                   |
| 52 | TATTC AAGGTCATGCGA | ESRRG_3, ESRRRA_known7, NR2F2_2, ESRRB_1, Esrrb, RARA_1, Nr5a2, ESRRRA_known11, ESRRRA_disc2, NR5A1_2, RORA_1, ESRRRA_known9                                                                                            |
| 53 | GGTTACGTAATA       | HLF, HLF_1, DBP_2, DBP_4, HLF_4, TEF_3, NFIL3_1, CEBPB_known9, CEBPB_known10                                                                                                                                            |
| 54 | GCCTGG             |                                                                                                                                                                                                                         |
| 55 | TGACTCA            | AP1_known10, AP1                                                                                                                                                                                                        |
| 56 | AGCTCAAGGTCA       | ESRRB_1, Esrrb, ESRRRA_disc2, Nr5a2, ESRRRA_known7, NR5A1_2, ESRRG_3, ESRRRA_known9, ESRRG_1, ESRRRA_known11, RARg, Nur77                                                                                               |
| 57 | AGAAGAACAAAGGACTA  | SOX4_1, SOX11_1, SOX15_1, SOX9_1, NANOG_disc2, SOX7_1, TCF7_1                                                                                                                                                           |
| 58 | ATAAGAACAAAGGACTA  | SOX11_1, SOX4_1, SOX15_1, SOX9_1, SOX7_1, TCF7_1, NANOG_disc2, SOX18_1                                                                                                                                                  |
| 59 | TAAATG             |                                                                                                                                                                                                                         |
| 60 | CCAAGGTCACA        | ESRRRA_disc2, ESRRG_3, NR5A1_2, ESRRRA_known7                                                                                                                                                                           |
| 61 | AGGACGCTGTAAAGGGA  | RHOXF1_1, RHOXF1_7                                                                                                                                                                                                      |
| 62 | CCATTGTTC          | SOX9_2, SOX9, SOX9_1                                                                                                                                                                                                    |
| 63 | ACAACAC            | BRCA1                                                                                                                                                                                                                   |
| 64 | AAGGTCA            |                                                                                                                                                                                                                         |
| 65 | AAGACGCTGTAAAGCGA  | RHOXF1_1, RHOXF1_7                                                                                                                                                                                                      |
| 66 | AGCTGTAACTAGCCGT   | HNF1A_2, HNF1A_3, HMBOX1_2, PAX4_6                                                                                                                                                                                      |
| 67 | ATCAAGGTCA         | RORA_4, RORA_1                                                                                                                                                                                                          |
| 68 | TTTAAACA           |                                                                                                                                                                                                                         |
| 69 | AAAAATAACAAACGG    |                                                                                                                                                                                                                         |
| 70 | CCTTAGTAACTAAAAT   | HNF1A_3, HNF1A_2                                                                                                                                                                                                        |
| 71 | CCATTGTTTT         | Sox3, Sox6, NANOG_disc2, SOX9_1, SOX9_2, SOX9, SOX11_1, SOX4_1                                                                                                                                                          |
| 72 | CGAAGCACACAAAATA   |                                                                                                                                                                                                                         |
| 73 | TTCATTGTC          | Sox17                                                                                                                                                                                                                   |
| 74 | AGATAA             |                                                                                                                                                                                                                         |
| 75 | GGTGACTCATG        | Jun-AP1, PRDM1_disc2, Atf3, AP-1, BATF, EP300_disc1, STAT_disc2, TRIM28_disc1, Fos, BCL_disc2, NFE2_known2, AP1_known4, IRF_disc2, BATF_disc1, AP1_known8, AP1_known10, AP1                                             |
| 76 | ATATCAAAACAAAACA   |                                                                                                                                                                                                                         |
| 77 | GGATGACTCAT        | Jun-AP1, Atf3, TRIM28_disc1, PRDM1_disc2, BATF, STAT_disc2, AP-1, EP300_disc1, BCL_disc2, BATF_disc1, Fos, NFE2, IRF_disc2, AP1_known8, NFE2_known2, NFAT:AP1, AP1_known4, BACH1_1, AP1_known2, AP1_known10, AP1, Bach2 |
| 78 | CCTTTGTT           | Sox3, SOX2_1, Sox2                                                                                                                                                                                                      |



|     |                      |                                                                                                                                                                                                                                                                                                 |
|-----|----------------------|-------------------------------------------------------------------------------------------------------------------------------------------------------------------------------------------------------------------------------------------------------------------------------------------------|
| 79  | TGTGACTCATT          | Atf3, Jun-AP1, AP-1, EP300_disc1, BCL_disc2, BATF, STAT_disc2, PRDM1_disc2, IRF_disc2, BATF_disc1, TRIM28_disc1, NFE2_known2, NFAT:AP1, NF-E2, AP1_known10, AP1, Fos                                                                                                                            |
| 80  | ATTGAACAATGGAATT     | SOX7_1, SOX15_1, SOX9_1, SOX11_1, SOX4_1, SOX18_1, SOX9_2, SOX9, Sox6, SOX13_1                                                                                                                                                                                                                  |
| 81  | ACTTAGTAACTAAAAA     | HNFA1A_2, HNF1A_3                                                                                                                                                                                                                                                                               |
| 82  | AGGAGATGACTCAT       | BATF, STAT_disc2, PRDM1_disc2, BCL_disc2, Atf3, Jun-AP1, EP300_disc1, BATF_disc1, TRIM28_disc1, AP-1, IRF_disc2, NFAT:AP1, NFE2_known2, AP1_known8, Fos, BACH1_1, NF-E2, AP1_known10, AP1                                                                                                       |
| 83  | AAGGTCAC             | NR4A2, RARG_9, THRB_2, RARA_1, RARG_1                                                                                                                                                                                                                                                           |
| 84  | CTTCAGGGGTCAATTGA    | RXRA_known9                                                                                                                                                                                                                                                                                     |
| 85  | TATACATA             | FOXL1_2, FOXL1, FOXL1_1                                                                                                                                                                                                                                                                         |
| 86  | TAATTGTTCTAAAC       | SOX18_1, SOX13_1, SOX7_1, SOX15_1                                                                                                                                                                                                                                                               |
| 87  | TACCCTAGTTACCGA      |                                                                                                                                                                                                                                                                                                 |
| 88  | AATCCCTTTGATCTATC    | TCF7_1, Tcf4, TCF7L2_known7, SOX11_1, TCF7L1_2, SOX4_1, Tcf3, TCFL2                                                                                                                                                                                                                             |
| 89  | TATATACATGTAAAATT    | IRX4_1, IRX3_1, IRX6_1                                                                                                                                                                                                                                                                          |
| 90  | CAGGGC               |                                                                                                                                                                                                                                                                                                 |
| 91  | TGTCGTGACCCCTTAAT    | RXRA_known9, NR2F2_2                                                                                                                                                                                                                                                                            |
| 92  | AAGTTCAAGGTCAGC      | Nr5a2, ESRRR_disc2, RARg, ESRRB_1, Esrrb, NR5A1_2, ESRRR_known7, ESRRG_3, ESRRR_known11, PAX6_2                                                                                                                                                                                                 |
| 93  | TCGCGAAGGTTGTACT     |                                                                                                                                                                                                                                                                                                 |
| 94  | AGGGGTGAGAGGTCA      | TR4, NR2C2_known1, NR2F6_3, RXRA_known10, RXRA_known12, RXRB_1, HNF4_known19, RXRA_known1, PPARG::RXRA, HNF4_known7, PPARA_4, RXRA_known7, HNF4_known1, NR1H2::RXRA, RXR, PPARE, HNF4_known14, HNF4A, HNF4_known2, HNF4_known13, NR2F1, PPARA_3, HNF4a, HNF4_known9, HNF4_known17, HNF4_known21 |
| 95  | CACGTGG              | MYC_known15, MAX, USF1, CLOCK, MYC_known7, Mycn, BMAL1, MYC_known3, MYC_known21, MYC_known22, MYCN_1                                                                                                                                                                                            |
| 96  | GCAAAACATTACTA       |                                                                                                                                                                                                                                                                                                 |
| 97  | GAAATGACTCA          | BATF_disc1, TRIM28_disc1, BCL_disc2, IRF_disc2, BATF, Atf3, Jun-AP1, STAT_disc2, EP300_disc1, AP-1, NFAT:AP1, PRDM1_disc2                                                                                                                                                                       |
| 98  | GTAAAAAATAATTT       |                                                                                                                                                                                                                                                                                                 |
| 99  | TTGTATGCAAATTAGA     | POU2F3_1, POU2F2_known4, POU3F1_2, POU2F2_known8, POU2F2_2, POU2F3_2, POU2F2_known15, POU3F3_2, POU2F2_known12, Oct4, POU2F2_known10, Oct2, POU2F2_known13, POU2F2_known9                                                                                                                       |
| 100 | ATTTCTTTGATCTATA     | TCF7_1, Tcf4, TCF7L2_known7, SOX11_1, SOX4_1, Tcf3, TCF7L1_2, TCFL2, TCF7L2_known4                                                                                                                                                                                                              |
| 101 | AACACCAAAACAAAGGA    |                                                                                                                                                                                                                                                                                                 |
| 102 | AAATAGACAAAGGAAT     |                                                                                                                                                                                                                                                                                                 |
| 103 | GTGCTAATTGTGTGTACGCT |                                                                                                                                                                                                                                                                                                 |
| 104 | GGATGACTCAT          |                                                                                                                                                                                                                                                                                                 |
| 105 | AAAATACATGTAATACT    | IRX3_1, IRX4_1, IRX6_1                                                                                                                                                                                                                                                                          |
| 106 | CAGCCTG              |                                                                                                                                                                                                                                                                                                 |
| 107 | GGGCCGTGTGCAAAAA     | MTF1_3, MTF1_1                                                                                                                                                                                                                                                                                  |

|     |                         |                                                                                                                                                                                                                                                                                             |
|-----|-------------------------|---------------------------------------------------------------------------------------------------------------------------------------------------------------------------------------------------------------------------------------------------------------------------------------------|
| 108 | TAAATACATGTAAAATT       | IRX6_1, IRX3_1, IRX4_1                                                                                                                                                                                                                                                                      |
| 109 | AATTACCTGTCAATAC        | MEIS3_1, PKNOX2_1, TGIF1_2                                                                                                                                                                                                                                                                  |
| 110 | GGTGACTCATC             | Jun-AP1, Atf3, AP-1, PRDM1_disc2, BATF, STAT_disc2, EP300_disc1, NFE2_known2, BCL_disc2, IRF_disc2, BACH1_1, TRIM28_disc1, BATF_disc1, AP1_known10, AP1                                                                                                                                     |
| 111 | TGGCCACCAGGGGGCGCTA     | CTCF_known1, CTCF, SMC3_disc1, BORIS, CTCF_disc9                                                                                                                                                                                                                                            |
| 112 | GTAGGGCAAAGGTCA         | RXRA_known7, PPARE, RXR, PPARA_3, PPARA_4, HNF4_known14, HNF4A, HNF4_known1, HNF4_known7, HNF4_known9, TR4, NR2C2_known1, NR2F6_3, RXRA_known10, HNF4_known2, HNF4_known13, RXRA_known12, NR2F1, HNF4_known19, RXRB_1, HNF4a, Nur77, Erra, PPARG::RXRA                                      |
| 113 | AACTAGCTGTCAATAC        | MEIS3_1, PKNOX2_1, TGIF1_2                                                                                                                                                                                                                                                                  |
| 114 | AATATACATGTAAAACA       | IRX4_1, IRX3_1, IRX6_1                                                                                                                                                                                                                                                                      |
| 115 | CAGCATGACTCAGCA         | NF-E2, Nrf2, NFE2L2_2, NFE2L2, Bach2, Bach1, MAF_known2                                                                                                                                                                                                                                     |
| 116 | ACTGACGCTTGGTTACCACAAAG |                                                                                                                                                                                                                                                                                             |
| 117 | ACACACAC                |                                                                                                                                                                                                                                                                                             |
| 118 | ATTGATGAGTCACCAA        | Jun-AP1, Atf3, PRDM1_disc2, TRIM28_disc1, AP-1, BATF, STAT_disc2, EP300_disc1, BATF_disc1, BACH1_1, BCL_disc2, NFE2_known2, Fos, IRF_disc2, Bach2                                                                                                                                           |
| 119 | TTGTATGCAAATTAGA        | POU2F3_1, POU2F2_known8, POU2F2_known4, POU2F3_2, POU2F2_2, POU3F1_2, POU2F2_known15, Oct4, POU3F3_2, POU2F2_known12, POU2F2_known10, Oct2, POU2F2_known13, POU2F2_known9                                                                                                                   |
| 120 | CACATTCCTCCG            | TEAD1_2, TEAD1                                                                                                                                                                                                                                                                              |
| 121 | AAATTTGCTGACTTAGC       | MAF_known4, MafF, NRL_1, MAF_known7, MAFG_1                                                                                                                                                                                                                                                 |
| 122 | TTATGTAACAT             | NFIL3, NFIL3_1, TEF_3, DBP_2, DBP_4                                                                                                                                                                                                                                                         |
| 123 | TTAATATTTAAC            | HNF1B_1, HNF1B, Hnf1, HNF1A_4, HNF1B_4, HNF1_3, HNF1A_1, HNF1A, HNF1_4, HNF1_1                                                                                                                                                                                                              |
| 124 | AGCGGCACACACGCAA        |                                                                                                                                                                                                                                                                                             |
| 125 | AATATACATGTAATATT       | IRX3_1, IRX4_1, IRX6_1                                                                                                                                                                                                                                                                      |
| 126 | GAAGAACAGGTGTCCG        | MYF6_1, TCF3_2, TCF3_1, Ptf1a, Myf5, ASCL2_1, MyoD                                                                                                                                                                                                                                          |
| 127 | CCGATGACGTCATCGT        | ATF7_1, JDP2_3, JDP2_5, JDP2_7, JunD, CREB3_1, c-Jun-CRE, Atf1, BATF_known1, ATF3_known12, E2F_disc1, ATF3_known8, ATF3_known2, CRE, ATF2_3, ATF3_known14                                                                                                                                   |
| 128 | TGTTCCCATTTGTGTA        |                                                                                                                                                                                                                                                                                             |
| 129 | AAAGGTCAAAGGTCAAC       | NR1H2::RXRA, NR2F6_3, NR2C2_known1, PPARG::RXRA, RXRA_known1, TR4, RXRA_known10, RXRA_known12, RXRB_1, HNF4_known19, HNF4_known7, PPARA_4, HNF4_known1, HNF4_known2, HNF4_known13, NR2F1, HNF4_known14, HNF4A, HNF4_known9, RXR, PPARE, PPARA_3, HNF4a, RXRA_known7, HNF4_known21, TCF7L1_2 |
| 130 | TTCAATTGTTCTAAAA        | SOX18_1, SOX7_1, SOX15_1, SOX13_1, SOX9_1, Sox6, SRY_2                                                                                                                                                                                                                                      |
| 131 | ATGACTCAGCAATTT         | Bach1, Nrf2, NF-E2, NFE2L2, NFE2L2_2, Bach2, MAFG_1, MAF_known7, MAF_known2, MafA, MAF_known11, MafK                                                                                                                                                                                        |
| 132 | CATCAATTGTTCCGCTA       | SOX15_1, SOX7_1, SOX13_1, SOX18_1, SOX9_1, SOX11_1, SOX4_1                                                                                                                                                                                                                                  |
| 133 | ATGGGATATATCCGCCT       |                                                                                                                                                                                                                                                                                             |
| 134 | TGCGTG                  | AHR::ARNT_3, Arnt::Ahr, AHR::ARNT_1                                                                                                                                                                                                                                                         |
| 135 | ATTGTTA                 | Sox5                                                                                                                                                                                                                                                                                        |

|     |                        |                                                                                                                                                                                                                                                              |
|-----|------------------------|--------------------------------------------------------------------------------------------------------------------------------------------------------------------------------------------------------------------------------------------------------------|
| 136 | AAAATACATGAAAAAT       | IRX6_1, IRX3_1, IRX4_1                                                                                                                                                                                                                                       |
| 137 | CCATGTGCTT             | MYC::MAX, Max, n-Myc                                                                                                                                                                                                                                         |
| 138 | TAGTGAACAATAGATTT      | SOX15_1, SOX7_1, SOX13_1, SOX9_1, SOX18_1, SOX11_1, SOX4_1, SRY_2                                                                                                                                                                                            |
| 139 | AAGGAGCTGTCAATAC       | MEIS3_1, PKNOX2_1, TGIF1_2                                                                                                                                                                                                                                   |
| 140 | AGAACAGAATGTTCT        | NR3C1_disc1, ARE, GRE, PR, NR3C2_1, NR3C1_known4, NR3C1_known6, NR3C1_known3, NR3C1, NR3C1_known10, NR3C1_known8, Ar, NR3C1_known1, NR3C1_known17, NR3C1_known15, NR3C1_known2                                                                               |
| 141 | GGCGAGGGGTCAAGGGC      | RXRA_known9, NR2F2_2                                                                                                                                                                                                                                         |
| 142 | CAATACCGGAAGTGTA       | ETS_known12, ELK3_1, ERF_1, FEV_2, ELK4, ETS_known2, EHF_1, ETV4_2, ETS_known1, ETS_disc2, ETS, ETV1, Elk1, BCL_disc1, ELF1, ETS_known3, Elk4, ETV2_1, GABPA, ELF1_known2, ELF1_disc1, ELF4_1, Fli1, ELF5_3, ELF5_4, ERG, SPDEF_1                            |
| 143 | CGACCATCTGTT           | TAL1::TCF3, TAL1_known2, Olig2, OLIG1_1, Atoh1, OLIG2_2, NeuroD1, BHLHA15_1                                                                                                                                                                                  |
| 144 | GCTGAGTCAGCAATTTTT     | MAF_known4, MafF, MAFG_1, MAF_known7, MafA, MafK, Bach1, MAF_known9, MAF_known11, NRL_1, MAF_disc2, Bach2, NF-E2                                                                                                                                             |
| 145 | ACATGCCCAGACATG        | p63, TP73_1, TP53_4, TP53, TP63_1, TP53_1, p53                                                                                                                                                                                                               |
| 146 | AAAGACCTGTCAATAC       | MEIS3_1, PKNOX2_1, TGIF1_2                                                                                                                                                                                                                                   |
| 147 | GATATTGACAGCTGCGT      | TGIF1_2, PKNOX2_1, MEIS3_1                                                                                                                                                                                                                                   |
| 148 | AATAAAGAACAATAGAATTTCA | SOX7_1, SOX15_1, SOX18_1, SOX9_1, SOX13_1, SOX11_1, SRY_2, SOX4_1, SOX9_2, SOX9, Sox6                                                                                                                                                                        |
| 149 | TGACCTAAAGTAACCTCTG    | LXRE, RARG_3, RARA_2, TRa, RARB_2, RARA_6, RARA_8, RARG_9                                                                                                                                                                                                    |
| 150 | ACGATGACGTCATCGA       | ATF7_1, CREB3_1, JunD, JDP2_7, JDP2_5, JDP2_3, Atf1, c-Jun-CRE, E2F_disc1, ATF3_known12, CRE, ATF3_known8, BATF_known1, ATF3_known14, ATF3_known2, ATF2_3, ATF3_known10, ATF3_disc2, ATF2_2, ARNT_2                                                          |
| 151 | AAGATGATGTCAT          | c-Jun-CRE, JunD                                                                                                                                                                                                                                              |
| 152 | AGCCGAAAAAAAAAAT       |                                                                                                                                                                                                                                                              |
| 153 | AAGCACATGG             |                                                                                                                                                                                                                                                              |
| 154 | AAAGATCAAAGGAA         | Tcf4, TCF7_1, TCF7L2_known7, Tcf3, TCFL2, TCF7L1_2, TCF7L2_known4                                                                                                                                                                                            |
| 155 | CCAAGTCCA              | AMYB                                                                                                                                                                                                                                                         |
| 156 | GGGTGGGGTGGAG          |                                                                                                                                                                                                                                                              |
| 157 | AAAGACCTGTCAATCC       | MEIS3_1, PKNOX2_1, TGIF1_2                                                                                                                                                                                                                                   |
| 158 | GGGTTTAAATAAATTC       | ARID3A_2, LMX1B_1, LHX5_1, LHX1_1, PROP1_1, ALX1_3, LHX3_3, HOXB4_1, PAX7_1, UNCX_1, HOXC4_1, HOXC6_1, LHX9_1, HOXA4_2, NOBOX_2, POU3F2_4, DBX2_1, POU2F2_known14, VAX2_1, PHOX2A_1, RHOXF2_1, PAX4_6, POU3F4_1, LHX4_2, PRRX2_1, HOXD13_1, HOXD3_1, HOXA7_3 |
| 159 | TATAGATCAAAGGAAAA      | TCF7_1, Tcf4, TCF7L2_known7, Tcf3, SOX11_1, SOX4_1, TCFL2, TCF7L2_known4, TCF7L1_2                                                                                                                                                                           |
| 160 | CCGCCAAGGGCAG          | TFAP2_known14, TFAP2_known11, TFAP2_known20                                                                                                                                                                                                                  |
| 161 | GAGCACGTGGT            | MYC::MAX, MYC_known1, MYC_known13, Max, MYC_known19, MYC_known21, n-Myc, MYC_known18, Myc, c-Myc, MNT_1, MYC_known15, MAX, Mycn, MYC_known3, USF1, Arnt                                                                                                      |
| 162 | AAGCACCTGTCAATAT       | PKNOX2_1, MEIS3_1, TGIF1_2                                                                                                                                                                                                                                   |
| 163 | TAAAAATGCTGACTT        | MafF, MAF_known4, MAF_disc2, NRL_1                                                                                                                                                                                                                           |

|     |                   |                                                                                                                                                                                                                                                                                                                                                                                                                                                                                                                                                                                                                                                                                                                                                                                                                |
|-----|-------------------|----------------------------------------------------------------------------------------------------------------------------------------------------------------------------------------------------------------------------------------------------------------------------------------------------------------------------------------------------------------------------------------------------------------------------------------------------------------------------------------------------------------------------------------------------------------------------------------------------------------------------------------------------------------------------------------------------------------------------------------------------------------------------------------------------------------|
| 164 | TTGAAAACCGTTAATTT | MYB_6, MYBL2_3, MYBL1_4                                                                                                                                                                                                                                                                                                                                                                                                                                                                                                                                                                                                                                                                                                                                                                                        |
| 165 | TCACCCATCAATAATCA |                                                                                                                                                                                                                                                                                                                                                                                                                                                                                                                                                                                                                                                                                                                                                                                                                |
| 166 | TATAGATCAAAGGAAAA | TCF7_1, Tcf4, TCF7L2_known7, Tcf3, SOX11_1, SOX4_1, TCFL2, TCF7L1_2, TCF7L2_known4                                                                                                                                                                                                                                                                                                                                                                                                                                                                                                                                                                                                                                                                                                                             |
| 167 | CTATAATTGTTATCG   |                                                                                                                                                                                                                                                                                                                                                                                                                                                                                                                                                                                                                                                                                                                                                                                                                |
| 168 | AAAGATGATGTCATC   | c-Jun-CRE, JunD, ATF7_1, JDP2_7, JDP2_3, JDP2_5, CREB3_1, Atf1, BATF_known1                                                                                                                                                                                                                                                                                                                                                                                                                                                                                                                                                                                                                                                                                                                                    |
| 169 | AGGATGACTCAGCAC   | NF-E2, Nrf2, NFE2L2_2, Bach1, NFE2L2, Bach2, MAF_known2, MAF_known9, MafK, MAF_known11, MafA, MAF_known7, BACH1_1, MAFG_1, AP-1                                                                                                                                                                                                                                                                                                                                                                                                                                                                                                                                                                                                                                                                                |
| 170 | ATCCACAGGTGCGAAAA | TCF3_6, TCF3_2, TCF3_7, ASCL2_1, ZEB1_known3, LMO2_1, ID4_1, TCF4_2, E2A-nearPU.1                                                                                                                                                                                                                                                                                                                                                                                                                                                                                                                                                                                                                                                                                                                              |
| 171 | AGGTCACCCTGACCT   | ESRRA_disc1, ESR2, ERE, ESR1, PPARG, ESRRA_disc3                                                                                                                                                                                                                                                                                                                                                                                                                                                                                                                                                                                                                                                                                                                                                               |
| 172 | CGACCAACTGCCATGC  | AMYB                                                                                                                                                                                                                                                                                                                                                                                                                                                                                                                                                                                                                                                                                                                                                                                                           |
| 173 | AGATAAGA          |                                                                                                                                                                                                                                                                                                                                                                                                                                                                                                                                                                                                                                                                                                                                                                                                                |
| 174 | GCGGAGGTGTGCGCTC  |                                                                                                                                                                                                                                                                                                                                                                                                                                                                                                                                                                                                                                                                                                                                                                                                                |
| 175 | TAACGTCCGC        | MIZF                                                                                                                                                                                                                                                                                                                                                                                                                                                                                                                                                                                                                                                                                                                                                                                                           |
| 176 | TGACCACGTGGTCGGG  | MYC_known19, Max, MYC_known1, MYC_known21, MYC::MAX, n-Myc, MYC_known3, MYC_known13, MYC_known15, MNT_1, MAX, MYC_known12, c-Myc, MYCN_1, MYC_known5, USF1, ARNT_2, Mycn, TCF3_2, MYC_known11, Arnt, MYC_known18, Myc, TCF3_6, Usf2, MYC_known7, BHLHE40_known2, BMAL1                                                                                                                                                                                                                                                                                                                                                                                                                                                                                                                                         |
| 177 | CCTTTGTTTT        | NANOG_disc2, SOX4_1, SOX11_1, Sox3                                                                                                                                                                                                                                                                                                                                                                                                                                                                                                                                                                                                                                                                                                                                                                             |
| 178 | AACAGTGCAG        | MyoD, MyoG, Tcf12, ASCL2_1, Ptf1a, E2A, ASCL2_2, MYOD1_2, Ap4, Myf5                                                                                                                                                                                                                                                                                                                                                                                                                                                                                                                                                                                                                                                                                                                                            |
| 179 | GAGCACAGCAGGACA   |                                                                                                                                                                                                                                                                                                                                                                                                                                                                                                                                                                                                                                                                                                                                                                                                                |
| 180 | GAGTGTACGTACGATGG | GMEB1_1                                                                                                                                                                                                                                                                                                                                                                                                                                                                                                                                                                                                                                                                                                                                                                                                        |
| 181 | CACAGTGCAG        | Tcf12, E2A, TCF3_1, MyoD, TFAP4_4, ASCL2_1                                                                                                                                                                                                                                                                                                                                                                                                                                                                                                                                                                                                                                                                                                                                                                     |
| 182 | ATGGAAACCGTTATTTT | MYB_6, MYBL1_4, MYBL2_3                                                                                                                                                                                                                                                                                                                                                                                                                                                                                                                                                                                                                                                                                                                                                                                        |
| 183 | TATTGGTAATTACCTT  | HOXB6_1, HOXA6_1, HOXC6_1, HOXA2_1, HOXD3_1, BARX1_1, MEOX1_1, PDX1_4, BSX_1, DLX4_1, DLX2_1, MEOX1_2, HOXC4_1, PAX7_1, HOXA2_2                                                                                                                                                                                                                                                                                                                                                                                                                                                                                                                                                                                                                                                                                |
| 184 | GAAGATCAATCACTTA  |                                                                                                                                                                                                                                                                                                                                                                                                                                                                                                                                                                                                                                                                                                                                                                                                                |
| 185 | TTCTTATCTGT       | GATA_known15, Gata2, GATA_known16, HDAC2_disc1, GATA_known18, Gata4, CCNT2_disc1, GATA_known6                                                                                                                                                                                                                                                                                                                                                                                                                                                                                                                                                                                                                                                                                                                  |
| 186 | TAAGTAATTAGTTATA  | DBX2_1, MNX1_1, PHOX2A_1, HOXC6_1, ALX3_1, POU3F2_4, BARX1_1, HOXA7_3, EVX1_1, VAX2_1, PAX7_1, POU2F2_known14, PRRX2_3, HOXB4_1, BARHL1_1, PRRX2_1, EN2_1, GBX1_1, LHX9_1, HOXC4_1, ALX1_3, EMX2_1, LHX3_3, NOBOX_2, BSX_1, PDX1_4, NKX6-1_3, UNCX_1, LHX6_3, ARX_1, RHOXF2_1, HOXA4_2, HOXA2_3, POU3F4_1, Pax7-longest, LHX5_1, LMX1B_1, LHX1_1, ISX_1, DLX4_1, LHX2_2, HOXB6_1, PAX4_6, LHX3_2, Lhx3, LHX6_2, MSX2_1, PROP1_1, GBX1_2, NKX6-2_1, HOXA3_2, ESX1_3, HOXB3_2, Nobox, GBX1_3, NKX1-1_1, MEOX1_2, GSX1_1, HOXD3_1, DLX2_1, HOXA6_1, ALX3_2, LHX4_2, HESX1_1, HOXA2_2, Lhx2, HMX1_1, PRRX1_3, HOXA2_1, MIXL1_1, VAX1_2, VSX1_2, HMX3_2, DLX1_2, PDX1_6, RAX2_1, SHOX_1, MEOX1_1, LHX8_3, PRRX2_4, NOTO_1, DLX5_2, ISX_4, EMX2_3, HOXB8_1, LHX3_1, EVX2_2, VSX2_2, DLX3_2, DLX2_3, LMX1B_2, HOXC9_1 |
| 187 | CAATCACTGGCAGAAT  |                                                                                                                                                                                                                                                                                                                                                                                                                                                                                                                                                                                                                                                                                                                                                                                                                |
| 188 | TTATGTACTAATAA    |                                                                                                                                                                                                                                                                                                                                                                                                                                                                                                                                                                                                                                                                                                                                                                                                                |

|     |                      |                                                                                                                                                                                                                                                                                                                                                                                 |
|-----|----------------------|---------------------------------------------------------------------------------------------------------------------------------------------------------------------------------------------------------------------------------------------------------------------------------------------------------------------------------------------------------------------------------|
| 189 | CGACCAACTGCCGTG      | AMYB                                                                                                                                                                                                                                                                                                                                                                            |
| 190 | GAAAAGTAACTGTTAACATC |                                                                                                                                                                                                                                                                                                                                                                                 |
| 191 | AAGGCCAGATGGTCCGG    | TAL1_known2, Atoh1, YY1_known2, TAL1::TCF3, ZBTB18_3, TCF3_1, ZBTB18_1                                                                                                                                                                                                                                                                                                          |
| 192 | TGACGTCA             | ATF3_known8, ATF3_known2, ATF3_known14, E2F_disc1, Atf1, JDP2_7, JDP2_3, JDP2_5, CRE, ATF7_1, CREB3_1, JunD, BATF_known1, ATF2_3, ATF3_known10, c-Jun-CRE, ATF3_known12, ATF2_2                                                                                                                                                                                                 |
| 193 | GGAATAATTACTTCAG     | DLX2_1, MEOX1_1, BSX_1, HOXD3_1, PDX1_4, HOXA2_1, HOXA6_1, BARX1_1, DLX4_1, HOXA3_2, PRRX2_1, HOXC6_1, DLX5_2, PAX4_6, DLX1_2, HOXA2_3, MEOX1_2, ALX3_1, HOXB6_1, PAX7_1, EVX1_1, GBX1_1, EVX2_2, Pax7-longest, DLX2_3, UNCX_2, VAX2_1, DBX2_1, PRRX2_3, ESX1_3, DLX3_2, ALX3_2, HOXA2_2, NOBOX_2, NKX6-2_1, ALX1_3, MIXL1_1, EN2_1, HOXB4_1, HOXB3_2, HESX1_1, MNX1_1, HOXC4_1 |
| 194 | CAAACAACAACACCT      |                                                                                                                                                                                                                                                                                                                                                                                 |
| 195 | ACCGGTTGATCACCTGA    |                                                                                                                                                                                                                                                                                                                                                                                 |
| 196 | CACGTG               | Arnt, Mycn, MNT_1, bHLHE40, MYC::MAX, CREB3L1_2, MYC_known12, USF1, BMAL1, CLOCK, c-Myc, BHLHE40_known2, NFE2_disc2, BHLHE40_disc1, MYC_known15, BHLHE41_1, BHLHE40_known4, MYC_known21, MLXIPL_1, MLX_2, SREBP_known5, MAX, n-Myc                                                                                                                                              |
| 197 | AGTCACGC             | PAX2_3, Pax2                                                                                                                                                                                                                                                                                                                                                                    |
| 198 | CCACTTCCGGC          | BCL_disc1, ETS_disc2, Elk1, ETS_known2, ELK3_1, ERF_1, FEV_2, Elk4, ETS_known12, ETV4_2, EHF_1, ETS_known3, Fli1, GABPA, ELF1, ETS, ELF5_3, ELF5_4, ELK4, ERG, ETV1, ELF1_known2, ELF4_1, ELF1_disc1, ETS_known15                                                                                                                                                               |

<sup>a</sup>Tomtom  $q$ -value < 0.001.

<sup>b</sup>Motifs with no entries had no matching known motif at this threshold.

**Supplementary Table 17. Forward strand probe sequences used in electrophoretic mobility shift assays.**

|              |                                          |
|--------------|------------------------------------------|
| rs10830963-C | 5' TTCACACCATCT <u>C</u> CTATCCAGAACC 3' |
| rs10830963-G | 5' TTCACACCATCT <u>G</u> CTATCCAGAACC 3' |
| NEUROD1      | 5' AAATCTGGCCAGCTGCTGATCCAAA 3'          |

## DETAILED ACKNOWLEDGEMENTS

**ARIC.** The Atherosclerosis Risk in Communities Study is carried out as a collaborative study supported by National Heart, Lung, and Blood Institute contracts (HHSN268201100005C, HHSN268201100006C, HHSN268201100007C, HHSN268201100008C, HHSN268201100009C, HHSN268201100010C, HHSN268201100011C, and HHSN268201100012C), R01HL087641, R01HL59367 and R01HL086694; National Human Genome Research Institute contract U01HG004402; and National Institutes of Health contract HHSN268200625226C. The authors thank the staff and participants of the ARIC study for their important contributions. Infrastructure was partly supported by Grant Number UL1RR025005, a component of the National Institutes of Health and NIH Roadmap for Medical Research.

**D2D2007.** The FIN-D2D study has been financially supported by the hospital districts of Pirkanmaa, South Ostrobothnia, and Central Finland, the Finnish National Public Health Institute (National Institute for Health and Welfare), the Finnish Diabetes Association, the Ministry of Social Affairs and Health in Finland, the Academy of Finland (grant number 129293), the European Commission (Directorate C-Public Health grant agreement number 2004310), and Finland's Slottery Machine Association.

**DANISH.** The study was funded by the Lundbeck Foundation and produced by the Lundbeck Foundation Centre for Applied Medical Genomics in Personalised Disease Prediction, Prevention and Care (LuCamp, [www.lucamp.org](http://www.lucamp.org)), and Danish Council for Independent Research. The Novo Nordisk Foundation Center for Basic Metabolic Research is an independent Research Center at the University of Copenhagen, partially funded by an unrestricted donation from the Novo Nordisk Foundation ([www.metabol.ku.dk](http://www.metabol.ku.dk)). The Inter99 study was funded by: Danish Research Councils; the Health Foundation; the Danish Centre for Evaluation and Health Technology Assessment; Copenhagen County; Danish Heart Foundation; Ministry of Health and Prevention; Association of Danish Pharmacies; Augustinus Foundation; Novo Nordisk; Velux Foundation; Becket Foundation; and Ib Henriksens Foundation.

**deCODE.** We thank the Icelandic study participants whose contribution made this work possible. The research performed at deCODE Genetics was part funded through the European Community's Seventh Framework Programme (FP7/2007-2013), ENGAGE project, grant agreement HEALTH-F4-2007-201413.

**DGDG.** This work was in part supported by the French Government (Agence Nationale de la Recherche), the French Region of Nord Pas De Calais (Contrat de Projets État-Région), the Programme Hospitalier de Recherche Clinique (French Ministry of Health), and the following charities: Association Française des Diabétiques, Programme National de Recherche sur le Diabète, Association de Langue Française pour l'Etude du Diabète et des Maladies Métaboliques, Association Diabète Risque Vasculaire (Paris, France) and Groupe d'Etude des Maladies Métaboliques et Systémiques. We are grateful to all patients and control individuals who participated in this study. We also thank Marianne Deweirder and Frédéric Allegaert (UMR-CNRS-8199, Genomic and Metabolic Disease, Lille, France) for their management of DNA samples.

**DILGOM.** The DILGOM study was supported by the Academy of Finland (grant number 118065). V.Salomaa was supported by the Academy of Finland (grant number 139635) and the Finnish Foundation for Cardiovascular Research. S.Mannisto was supported by the Academy of Finland (grant numbers 136895 and 263836). S.R. was supported by the Academy of Finland Center of Excellence in Complex Disease Genetics (grant numbers 213506 and 129680), the Academy of Finland (grant number 251217), the Finnish Foundation for Cardiovascular Research, and the Sigrid Juselius Foundation.

**DRsEXTRA.** The DR's EXTRA Study was supported by the Ministry of Education and Culture of Finland (722 and 627;2004-2011), the Academy of Finland (grant numbers 102318, 104943, 123885 and 211119), Kuopio University Hospital, the Diabetes Research Foundation, Finnish Foundation for Cardiovascular Research, the Päivikki and Sakari Sohlberg Foundation, and by grants from European Commission FP6 Integrated Project (EXGENESIS, LSHM-CT-2004-005272), the City of Kuopio, and the Social Insurance Institution of Finland (4/26/2010).

**EGCUT.** EGCUT received financing by European Commission FP7 grants (201413, 245536), and also received targeted financing from the Estonian Government (SF0180142s08) and from the European Union through the European Regional Development Fund, in the frame of Centre of Excellence in Genomics and Estonian Research Infrastructure's Roadmap. We acknowledge EGCUT and Estonian Biocentre personnel, especially Ms. M. Hass and Mr V. Soo.

**EMIL-Ulm.** The EMIL Study received support by the State of Baden-Württemberg, Germany, the City of Leutkirch, Germany, and the German Research Council to B.O.B. (GRK 1041). The Ulm Diabetes Study Group received support by the German Research Foundation (DFG-GRK 1041) and the State of Baden-Wuerttemberg Centre of Excellence Metabolic Disorders to B.O.B.

**FHS.** This research was conducted in part using data and resources from the Framingham Heart Study of the National Heart Lung and Blood Institute of the National Institutes of Health and Boston University School of Medicine. The analyses reflect intellectual input and resource development from the Framingham Heart Study investigators participating in the SNP Health Association Resource (SHARe) project. This work was partially supported by the National Heart, Lung and Blood Institute's Framingham Heart Study (contract number N01-HC-25195) and its contract with Affymetrix, Inc for genotyping services (contract number N02-HL-6-4278). A portion of this research utilized the Linux Cluster for Genetic Analysis (LinGA-II) funded by the Robert Dawson Evans Endowment of the Department of Medicine at Boston University School of Medicine and Boston Medical Center. The work is also supported by National Institute for Diabetes and Digestive and Kidney Diseases (NIDDK) NIDDK R01 DK078616 to J.B.M., J.D. and J.C.F., NIDDK U01-DK085526 to H.C and J.D., NIDDK K24 DK080140 to J.B.M., and a Doris Duke Charitable Foundation Clinical Scientist Development Award to J.C.F.

**FUSION.** Support for FUSION was provided by NIH grants R01-DK062370 (to M.B.), R01-DK072193 (to K.L.M.), and intramural project number 1Z01-HG000024 (to F.S.C.). Genome-wide genotyping was conducted by the Johns Hopkins University Genetic Resources Core



Facility SNP Center at the Center for Inherited Disease Research (CIDR), with support from CIDR NIH contract number N01-HG-65403.

**GoDARTS.** The UK Type 2 Diabetes Genetics Consortium collection was supported by the Wellcome Trust (Biomedical Collections Grant GR072960).

**HEINZ NIXDORF RECALL (HNR).** We thank the Heinz Nixdorf Foundation, the German Federal Ministry of Research and Education (NGFN program project #01GS0820) for the generous support of this study. We thank the Ministry of Innovation, Science and Research of Nordrhein-Westfalia, as well as the Medical Faculty of the University Duisburg-Essen for their generous support. We acknowledge the support of Sarstedt AG & Co. (Nümbrecht, Germany) concerning laboratory equipment. We also thank the design team members and consortium leaders of the “Metabochip”. We are also grateful to Prof Dirk Schadendorf (Clinic Department of Dermatology, University Hospital Essen, University Duisburg-Essen, Essen, Germany) for funding this study.

**HUNT/TROMSO.** The Nord-Trøndelag Health Study (the HUNT Study) is a collaboration between the HUNT Research Centre (Faculty of Medicine, Norwegian University of Science and Technology NTNU), Nord-Trøndelag County Council, Central Norway Health Authority, and the Norwegian Institute of Public Health. The Tromsø Study was funded by The University of Tromsø, the National Health Screening Service of Norway, and the Research Council of Norway.

**IMPROVE and SCARFSHEEP.** The IMPROVE study was supported by the European Commission (LSHM-CT-2007-037273), the Swedish Heart-Lung Foundation, the Swedish Research Council (8691), the Knut and Alice Wallenberg Foundation, the Foundation for Strategic Research, the Torsten and Ragnar Söderberg Foundation, the Strategic Cardiovascular Programme of Karolinska Institutet, and the Stockholm County Council (560183). The SCARFSHEEP study was supported by the Swedish Heart-Lung Foundation, the Swedish Research Council, the Strategic Cardiovascular Programme of Karolinska Institutet, the Strategic Support for Epidemiological Research at Karolinska Institutet, and the Stockholm County Council. B.S. acknowledges funding from the Magnus Bergvall Foundation and the Foundation for Old Servants. M.F. acknowledges funding from the Swedish e-science Research Center (SeRC). R.J.S. is supported by the Swedish Heart-Lung Foundation, the Tore Nilsson Foundation, the Fredrick och Ingrid Thuring Foundation, and the Foundation for Old Servants. S.E.H. is supported by the British Heart Foundation (PG 08 08) and the UCL NIHR Biomedical Research Centre.

**InterACT.** Funding for the InterAct project was provided by the EU FP6 programme (grant number LSHM\_CT\_2006\_037197). We thank all EPIC participants and staff for their contribution to the study. We thank the lab team at the MRC Epidemiology Unit for sample management. I.B. acknowledges funding from the Wellcome Trust (grant number 098051) and the United Kingdom NIHR Cambridge Biomedical Research Centre.

**KORA.** The MONICA/KORA Augsburg studies were financed by the Helmholtz Zentrum

München-Research Center for Environment and Health, Neuherberg, Germany, and supported by grants from the German Federal Ministry of Education and Research (BMBF), the Federal Ministry of Health (Berlin, Germany), the Ministry of Innovation, Science, Research and Technology of the state North Rhine-Westphalia (Düsseldorf, Germany), the German National Genome Research Network (NGFN), the German Center for Diabetes Research (DZD), and the Munich Center of Health Sciences (MC Health) as part of LMUinnovativ. We thank all members of field staff who were involved in the planning and conduct of the MONICA/KORA Augsburg studies.

**LEIPZIG.** This work was supported by the Kompetenznetz Adipositas (Competence network for Obesity) funded by the Federal Ministry of Education and Research (German Obesity Biomaterial Bank; FKZ 01GI1128), and by a grant from Deutsche Forschungsgemeinschaft the SFB 1052 “Obesity mechanisms (A01, B01, B03, C01)”. IFB AdiposityDiseases is supported by the Federal Ministry of Education and Research (BMBF), Germany, FKZ 01EO1001.

**METSIM.** The METSIM study was funded by the Academy of Finland (grant numbers 77299 and 124243).

**NHS and HPFS.** The Nurses' Health Study and HPFS diabetes GWA scans were supported by NIH grants U01HG004399, DK58845 and CA055075.

**PIVUS and ULSAM.** These projects were supported by grants from the Swedish Research Council, the Swedish Heart-Lung Foundation, the Swedish Foundation for Strategic Research, the Royal Swedish Academy of Sciences, the Swedish Diabetes Foundation, the Swedish Society of Medicine, and the Novo Nordisk Foundation. Genotyping was performed by the SNP&SEQ Technology Platform in Uppsala ([www.genotyping.se](http://www.genotyping.se)). We thank Tomas Axelsson, Ann-Christine Wiman, and Caisa Pöntinen for their excellent assistance with genotyping. The SNP Technology Platform is supported by Uppsala University, Uppsala University Hospital, and the Swedish Research Council for Infrastructures.

**PPP-MALMO-BOTNIA (PMB).** The dataset include samples from several Swedish (ANDIS, Malmo Diet and Cancer, Malmo Preventive Project) and Finnish (Botnia Study, PPP-Botnia Study, DIREVA register) studies. The Botnia and PPP-Botnia studies have been financially supported by grants from the Sigrid Juselius Foundation, the Folkhälsan Research Foundation, the Ministry of Education in Finland, the Nordic Center of Excellence in Disease Genetics, the European Commission (EXGENESIS), the Signe and Ane Gyllenberg Foundation, the Swedish Cultural Foundation in Finland, the Finnish Diabetes Research Foundation, the Foundation for Life and Health in Finland, the Finnish Medical Society, the Paavo Nurmi Foundation, the Helsinki University Central Hospital Research Foundation, the Perklén Foundation, the Ollqvist Foundation, and the Närpes Health Care Foundation. The study has also been supported by the Municipal Health Care Center and Hospital in Jakobstad and Health Care Centers in Vasa, Närpes and Korsholm. The DIREVA register is supported by the Vaasa Hospital District and Hospital District of Southwest Finland. Swedish studies supported by grants from the Swedish Research Council (SFO EXODIAB 2009-1039, LUDC 349-2008-6589, 521-2007-4037, 521-2008-2974, ANDIS 825-2010-5983), the Knut and Alice Wallenberg Foundation (KAW 2009.0243), the Torsten and Ragnar Söderbergs Stiftelser

(MT33/09), the IngaBritt and Arne Lundberg's Research Foundation (grant number 359), and the Heart-Lung Foundation.

**ROTTERDAM STUDY.** The Rotterdam Study is funded by Erasmus Medical Center and Erasmus University, Rotterdam, Netherlands Organization for the Health Research and Development (ZonMw), the Research Institute for Diseases in the Elderly (RIDE), the Ministry of Education, Culture and Science, the Ministry for Health, Welfare and Sports, the European Commission (DG XII), and the Municipality of Rotterdam. The authors are grateful to the study participants, the staff from the Rotterdam Study and the participating general practitioners and pharmacists. The generation and management of GWAS genotype data for the Rotterdam Study are supported by the Netherlands Organisation of Scientific Research NWO Investments (numbers 175.010.2005.011, 911-03-012). This study is funded by the Research Institute for Diseases in the Elderly (014-93-015; RIDE2), the Netherlands Genomics Initiative (NGI)/Netherlands Organisation for Scientific Research (NWO) project number 050-060-810. We thank Pascal Arp, Mila Jhamai, Marijn Verkerk, Lizbeth Herrera and Marjolein Peters for their help in creating the GWAS database.

**SWEDISH TWIN REGISTRY (STR).** This work was supported by grants from the US National Institutes of Health (AG028555, AG08724, AG04563, AG10175, AG08861), the Swedish Research Council, the Swedish Heart-Lung Foundation, the Swedish Foundation for Strategic Research, the Royal Swedish Academy of Science, and ENGAGE (within the European Union FP7 HEALTH-F4-2007-201413). Genotyping was performed by the SNP&SEQ Technology Platform in Uppsala ([www.genotyping.se](http://www.genotyping.se)). We thank Tomas Axelsson, Ann-Christine Wiman, and Caisa Pöntinen for their excellent assistance with genotyping. The SNP Technology Platform is supported by Uppsala University, Uppsala University Hospital, and the Swedish Research Council for Infrastructures.

**WARREN 2/58BC and WELLCOME TRUST CASE CONTROL CONSORTIUM (WTCCC).**

Collection of the UK type 2 diabetes cases was supported by Diabetes UK, BDA Research, and the UK Medical Research Council (Biomedical Collections Strategic Grant G0000649). The UK Type 2 Diabetes Genetics Consortium collection was supported by the Wellcome Trust (Biomedical Collections Grant GR072960). Metachip genotyping was supported by the Wellcome Trust (Strategic Awards 076113, 083948, and 090367, and core support for the Wellcome Trust Centre for Human Genetics 090532), and analysis by the European Commission (ENGAGE HEALTH-F4-2007-201413), MRC (Project Grant G0601261), NIDDK (DK073490, DK085545 and DK098032), and Wellcome Trust (083270 and 098381). C.M.L. is a Wellcome Trust Career Development Fellow in Basic Biomedical Science (grant number 086596). A.P.M. is a Wellcome Trust Senior Fellow in Basic Biomedical Science (grant numbers 081682 and 098017). A.L.G. is a Wellcome Trust Senior Fellow in Basic Biomedical Science (grant number 095101). S.T. is a Radcliffe Department of Medicine Scholar). M.I.M. is a Wellcome Trust Senior Investigator.

**Miscellaneous.** L.Pasquali is a Ramon y Cajal investigator (RYC 2014-0069). The authors are grateful to Raphael Scharfmann (INSERM U1016, Cochin Institute Paris) for the gift of EndoC BH-1 cells and for providing technical support with their maintenance. The authors thank Paul Johnson and the Oxford National Institute for Health Research Biomedical Research Centre funded Islet Isolation facility for providing human islets for this study.

## Membership of the DIAbetes Genetics Replication And Meta-analysis (DIAGRAM) Consortium

Goncalo R Abecasis<sup>1</sup>, Peter Almgren<sup>2</sup>, Mustafa Atalay<sup>3</sup>, Damiano Baldassarre<sup>4,5</sup>, Beverley Balkau<sup>6,7</sup>, Inês Barroso<sup>8,9,10</sup>, Nicola L Beer<sup>11,12</sup>, John Beilby<sup>13,14,15</sup>, Rafn Benediktsson<sup>16,17</sup>, Richard N Bergman<sup>18</sup>, Ewan Birney<sup>19</sup>, Matthias Blüher<sup>20,21</sup>, Bernhard O Boehm<sup>22,23</sup>, Heiner Boeing<sup>24</sup>, Eric Boerwinkle<sup>25,26</sup>, Lori L Bonnycastle<sup>27</sup>, Erwin P Borringer<sup>28</sup>, Martijn van de Bunt<sup>11,12</sup>, Noël P Burt<sup>29</sup>, Harry Campbell<sup>30,31</sup>, Jason Carey<sup>29</sup>, Stephane Cauchi<sup>32</sup>, Guillaume Charpentier<sup>33</sup>, Han Chen<sup>34,35</sup>, Himanshu Chheda<sup>36</sup>, Peter S Chines<sup>27</sup>, Francis S Collins<sup>27</sup>, Marilyn C Cornelis<sup>37</sup>, David J Couper<sup>38</sup>, Andrew T Crenshaw<sup>29</sup>, Rob M van Dam<sup>39,40</sup>, John Danesh<sup>41</sup>, Ulf de Faire<sup>42</sup>, George Dedoussis<sup>43</sup>, Panagiotis Deloukas<sup>9,44</sup>, Antigone S Dimas<sup>45,46</sup>, Christian Dina<sup>47,48,49</sup>, Alex SF Doney<sup>50,51</sup>, Peter J Donnelly<sup>11,52</sup>, Mozghan Dorkhan<sup>53</sup>, Cornelia van Duijn<sup>54,55</sup>, Ian Dunham<sup>19</sup>, Josée Dupuis<sup>34,56</sup>, Sarah Edkins<sup>8</sup>, Lewin Eisele<sup>57</sup>, Valur Emilsson<sup>58</sup>, Raimund Erbel<sup>59</sup>, Johan G Eriksson<sup>60,61,62,63</sup>, Tonu Esko<sup>64,65,66</sup>, Elodie Eury<sup>67</sup>, João Fadista<sup>2</sup>, Teresa Ferreira<sup>11</sup>, Jorge Ferrer<sup>68,69</sup>, Jason Flannick<sup>29</sup>, Jose C Florez<sup>66,70,71,72</sup>, Pierre Fontanillas<sup>29</sup>, Nita G Forouhi<sup>73</sup>, Caroline Fox<sup>56,74</sup>, Mattias Frånberg<sup>75,76,77</sup>, Paul W Franks<sup>2,39,78,79</sup>, Timothy M Frayling<sup>80</sup>, Philippe Froguel<sup>32,67,81</sup>, Christian Fuchsberger<sup>1</sup>, Kyle J Gaulton<sup>11,82</sup>, Karl Gertow<sup>75</sup>, Christian Gieger<sup>83,84</sup>, Bruna Gigante<sup>41</sup>, Anna L Gloyn<sup>11,12,85</sup>, Omri Gottesman<sup>28</sup>, Harald Grallert<sup>83,84,86</sup>, George B Grant<sup>29</sup>, Niels Grarup<sup>87</sup>, Todd Green<sup>29</sup>, Leif C Groop<sup>2,36</sup>, Christopher J Groves<sup>12</sup>, Stefan Gustafsson<sup>88</sup>, Anders Hamsten<sup>75</sup>, Torben Hansen<sup>87,89</sup>, Maija Hassinen<sup>90</sup>, Andrew T Hattersley<sup>91</sup>, Christian T Have<sup>87</sup>, Caroline Hayward<sup>31</sup>, Christian Herder<sup>92,93</sup>, Albert Hofman<sup>54</sup>, Oddgeir L Holmen<sup>94</sup>, Momoko Horikoshi<sup>11,12</sup>, Kees Hovingh<sup>95</sup>, Astradur B Hreidarsson<sup>17</sup>, Frank B Hu<sup>39,96,97</sup>, Jennie Hui<sup>13,14,15,98</sup>, Steve E Humphries<sup>99</sup>, Sarah E Hunt<sup>8</sup>, David J Hunter<sup>39,96,97,100</sup>, Kristian Hveem<sup>94</sup>, Thomas Illig<sup>83,101</sup>, Erik Ingelsson<sup>11,88</sup>, Anne U Jackson<sup>1</sup>, Alan James<sup>13,102,103</sup>, Karl-Heinz Jockel<sup>57</sup>, Andrew D Johnson<sup>56</sup>, Anna Jonsson<sup>2</sup>, Marit E Jørgensen<sup>104</sup>, Torben Jørgensen<sup>105,106,107</sup>, Hyun Min Kang<sup>1</sup>, Stavroula Kanoni<sup>8</sup>, Wen Hong L Kao<sup>108</sup>, Lennart C Karssen<sup>54</sup>, Sekar Kathiresan<sup>29,71,109</sup>, Sirkka M Keinänen-Kiukaanniemi<sup>110,111</sup>, Nicola D Kerrison<sup>73</sup>, Hans Kestler<sup>112,113</sup>, Hassan Khan<sup>41</sup>, Kay-Tee Khaw<sup>41</sup>, Leena Kinnunen<sup>60</sup>, Norman Klopp<sup>83,101</sup>, Heikki Koistinen<sup>60,114,115</sup>, Pirjo Komulainen<sup>90</sup>, Augustine Kong<sup>116</sup>, Eeva Korpi-Hyövälti<sup>117</sup>, Peter Kovacs<sup>20,21</sup>, Peter Kraft<sup>35,96,100</sup>, Jasmina Kravic<sup>2</sup>, Ashish Kumar<sup>11</sup>, Johanna Kuusisto<sup>118</sup>, Phoenix Kwan<sup>1</sup>, Markku Laakso<sup>118</sup>, Vasiliki Lagou<sup>11</sup>, Timo A Lakka<sup>90,119,120</sup>, Claudia Langenberg<sup>73</sup>, Cordelia Langford<sup>8</sup>, Karin Leander<sup>42</sup>, Yeji Lee<sup>1</sup>, Elisabeth M van Leeuwen<sup>54</sup>, Man Li<sup>108</sup>, Liming Liang<sup>35,98</sup>, Peter Lichtner<sup>121</sup>, Lars Lind<sup>122</sup>, Michael Linderman<sup>123</sup>, Cecilia M Lindgren<sup>11,29</sup>, Eero Lindholm<sup>2</sup>, Allan Linneberg<sup>105,124,125</sup>, Ching-Ti Liu<sup>34</sup>, Stéphane Lobbens<sup>67</sup>, Adam Locke<sup>1</sup>, Ruth JF Loos<sup>28,73,126,127</sup>, Yingchang Lu<sup>128</sup>, Jian'an Luan<sup>73</sup>, Valeriya Lyssenko<sup>2,104</sup>, Clement Ma<sup>1</sup>, Reedik Mägi<sup>64</sup>, Anubha Mahajan<sup>11</sup>, Olga McLeod<sup>75</sup>, James B Meigs<sup>70,128</sup>, Olle Melander<sup>2</sup>, Andres Metspalu<sup>64,129</sup>, Julia Meyer<sup>130</sup>, Evelin Mihailov<sup>64</sup>, Ghazala Mirza<sup>131</sup>, Susanne Moebus<sup>57</sup>, Karen L Mohlke<sup>132</sup>, Andrew D Morris<sup>133</sup>, Andrew P Morris<sup>11,64,134,135</sup>, Thomas W Mühleisen<sup>136,137,138</sup>, Martina Müller-Nurasyid<sup>130,139,140,141</sup>, Bill Musk<sup>13,98,103,144</sup>, Satu Männistö<sup>60</sup>, Carmen Navarro<sup>145,146,147</sup>, Pau Navarro<sup>31</sup>, Peter M Nilsson<sup>3</sup>, Inger Njølstad<sup>148</sup>, Markus M Nöthen<sup>136,137</sup>, Christopher A O'Callaghan<sup>147</sup>, Nikolay N Oskolkov<sup>2</sup>, Katharine R Owen<sup>12,85</sup>, Domenico Palli<sup>148</sup>, Collin NA Palmer<sup>50,51</sup>, James S Pankow<sup>149</sup>, Lorenzo Pasquali<sup>150,151,152</sup>, Sonali Pechlivanis<sup>57</sup>, Nancy L Pedersen<sup>153</sup>, Oluf Pedersen<sup>87</sup>, Leena Peltonen<sup>8,29,36,60</sup>, John RB Perry<sup>73</sup>, Annette Peters<sup>84,86,141</sup>, Carl GP Platou<sup>94,154</sup>, Simon Potter<sup>8</sup>, Jackie F Price<sup>30</sup>, Inga Prokopenko<sup>81</sup>, Lu Qi<sup>39,96,97,155</sup>, Anne Raimondo<sup>12</sup>, Loukianos Rallidis<sup>156</sup>, Wolfgang Rathmann<sup>157</sup>, Rainer Rauramaa<sup>90,121</sup>, Soumya Raychaudhuri<sup>29,158,159</sup>, N William

Rayner<sup>8,11,12</sup>, Emil Rehnberg<sup>154</sup>, Michael E Reschen<sup>148</sup>, Samuli Ripatti<sup>8,36,160,161</sup>, Neil Robertson<sup>11,12</sup>, Michael Roden<sup>92,93,162</sup>, Elizabeth J Rossin<sup>29,66,163,164</sup>, Igor Rudan<sup>30</sup>, Douglas Ruderfer<sup>165</sup>, Jana K Rundle<sup>12</sup>, Denis Rybin<sup>166</sup>, Timo E Saaristo<sup>167,168</sup>, Danish Salehen<sup>41,169</sup>, Veikko Salomaa<sup>60</sup>, Juha Saltevo<sup>170</sup>, Jouko Saramies<sup>171</sup>, Yvonne T van der Schouw<sup>172</sup>, Laura J Scott<sup>1</sup>, Robert A Scott<sup>73</sup>, Ayellet V Segre<sup>29,70,71</sup>, Bengt Sennblad<sup>75,76</sup>, Sonia Shah<sup>173</sup>, Alan R Shuldiner<sup>174,175,176</sup>, Gunnar Sigurðsson<sup>17,58</sup>, Eric Sijbrands<sup>177</sup>, Angela Silveira<sup>75,178</sup>, Suthesh Sivapalaratnam<sup>95</sup>, Rob Sladek<sup>179,180</sup>, Thomas Sparso<sup>87</sup>, Alena Stančáková<sup>119</sup>, Kari Stefansson<sup>16,117</sup>, Gerald Steinbach<sup>181</sup>, Valgerdur Steinthorsdottir<sup>117</sup>, Kathleen Stirrups<sup>8</sup>, Petter Storm<sup>2</sup>, Konstantin Strauch<sup>131,141</sup>, Rona J Strawbridge<sup>75</sup>, Heather M Stringham<sup>1</sup>, Michael Stumvoll<sup>20,21</sup>, Qi Sun<sup>39,100</sup>, Ann-Christine Syvanen<sup>182</sup>, Tanya M Teslovich<sup>1</sup>, Soren K Thomsen<sup>12</sup>, Barbara Thorand<sup>84,86</sup>, Gudmar Thorleifsson<sup>117</sup>, Unnur Thorsteinsdottir<sup>16,117</sup>, Dorothee Thuillier<sup>32</sup>, Emmi Tikkanen<sup>36,161</sup>, Anke Tonjes<sup>20,21</sup>, Joseph Trakalo<sup>11</sup>, Elena Tremoli<sup>4,5</sup>, Mieke D Trip<sup>95</sup>, Tiinamaija Tuomi<sup>36,63,183,184</sup>, Jaakko Tuomilehto<sup>60,185,186,187</sup>, Andre G Uitterlinden<sup>54,55,177</sup>, Sailaja Vedantam<sup>65,66</sup>, Fabrizio Veglia<sup>4</sup>, Benjamin F Voight<sup>188</sup>, Simone Wahl<sup>83,84,86</sup>, Nicholas J Wareham<sup>73</sup>, Roman Wennauer<sup>177</sup>, Sara M Willems<sup>54,73</sup>, Tom Wilsgaard<sup>147</sup>, James F Wilson<sup>30,31</sup>, Steven Wiltshire<sup>11</sup>, Andrew R Wood<sup>80</sup>, Loic Yengo<sup>32</sup>, Delilah Zabaneh<sup>173</sup>, Eleftheria Zeggini<sup>8</sup>, David Altshuler<sup>29,70,71,72,189,190</sup>, Michael Boehnke<sup>1</sup>, Mark I McCarthy<sup>11,12,85</sup>

<sup>1</sup>Department of Biostatistics, University of Michigan, Ann Arbor, MI, USA. <sup>2</sup>Lund University Diabetes Centre, Department of Clinical Science Malmö, Scania University Hospital, Lund University, Malmö, Sweden. <sup>3</sup>Institute of Biomedicine, University of Eastern Finland, Kuopio Campus, Kuopio, Finland. <sup>4</sup>Centro Cardiologico Monzino, Istituto di Ricovero e Cura a Carattere Scientifico (IRCCS), Milan, Italy. <sup>5</sup>Dipartimento di Scienze Farmacologiche e Biomolecolari, Università di Milano, Milan, Italy. <sup>6</sup>INSERM CESP U1018, Villejuif, France. <sup>7</sup>University Paris Sud 11, UMRS 1018, Villejuif, France. <sup>8</sup>Wellcome Trust Sanger Institute, Hinxton, UK. <sup>9</sup>University of Cambridge Metabolic Research Laboratories, Wellcome Trust-MRC Institute of Metabolic Science, Cambridge, UK. <sup>10</sup>The National Institute for Health Research Cambridge Biomedical Research Centre, Cambridge, UK. <sup>11</sup>Wellcome Trust Centre for Human Genetics, University of Oxford, Oxford, UK. <sup>12</sup>Oxford Centre for Diabetes, Endocrinology and Metabolism, University of Oxford, Oxford, UK. <sup>13</sup>Busselton Population Medical Research Institute, Sir Charles Gairdner Hospital, Nedlands, Australia. <sup>14</sup>PathWest Laboratory Medicine of Western Australia, QEII Medical Centre, Nedlands, Australia. <sup>15</sup>School of Pathology and Laboratory Medicine, University of Western Australia, Nedlands, Australia. <sup>16</sup>Faculty of Medicine, University of Iceland, Reykjavik, Iceland. <sup>17</sup>Landspítali University Hospital, Reykjavik, Iceland. <sup>18</sup>Diabetes and Obesity Research Institute, Cedars-Sinai Medical Center, Los Angeles, CA, USA. <sup>19</sup>European Molecular Biology Laboratory, European Bioinformatics Institute (EMBL-EBI), Hinxton, UK. <sup>20</sup>IFB Adiposity Diseases, University of Leipzig, Leipzig, Germany. <sup>21</sup>Department of Medicine, University of Leipzig, Leipzig, Germany. <sup>22</sup>Division of Endocrinology and Diabetes, Department of Internal Medicine, University Medical Centre Ulm, Ulm, Germany. <sup>23</sup>Lee Kong Chian School of Medicine, Imperial College London and Nanyang Technological University, Singapore, Singapore. <sup>24</sup>German Institute of Human Nutrition, Potsdam-Rehbruecke, Germany. <sup>25</sup>Human Genetics Center, University of Texas Health Science Center at Houston, Houston, TX, USA. <sup>26</sup>Human Genome Sequencing Center at Baylor College of Medicine, Houston, TX, USA. <sup>27</sup>National Human Genome Research Institute, National Institutes of Health, Bethesda, MD, USA. <sup>28</sup>The Charles Bronfman Institute for Personalized Medicine, Icahn School of Medicine at Mount Sinai, New York, NY, USA. <sup>29</sup>Broad Institute of Harvard and Massachusetts Institute of Technology, Cambridge, MA, USA. <sup>30</sup>Centre for Population Health Sciences, University of Edinburgh, Edinburgh, UK. <sup>31</sup>MRC Institute of Genetics and Molecular Medicine at the University of Edinburgh, Western General Hospital, Edinburgh, UK. <sup>32</sup>Lille Institute of Biology, European Genomics Institute of Diabetes, Lille, France. <sup>33</sup>Endocrinology-Diabetology Unit, Corbeil-Essonnes Hospital, Corbeil-Essonnes, France.

<sup>34</sup>Department of Biostatistics, Boston University School of Public Health, Boston, MA, USA. <sup>35</sup>Department of Biostatistics, Harvard School of Public Health, Boston, MA, USA. <sup>36</sup>Finnish Institute for Molecular Medicine (FIMM), Helsinki, Finland. <sup>37</sup>Department of Preventive Medicine, Northwestern University Feinberg School of Medicine, Chicago, IL, USA. <sup>38</sup>Collaborative Studies Coordinating Center, Department of Biostatistics, University of North Carolina at Chapel Hill, Chapel Hill, NC, USA. <sup>39</sup>Department of Nutrition, Harvard School of Public Health, Boston, MA, USA. <sup>40</sup>Saw Swee Hock School of Public Health, National University of Singapore, Singapore, Singapore. <sup>41</sup>Department of Public Health and Primary Care, University of Cambridge, Cambridge, UK. <sup>42</sup>Division of Cardiovascular Epidemiology, Institute of Environmental Medicine, Karolinska Institutet, Stockholm, Sweden. <sup>43</sup>Department of Dietetics-Nutrition, Harokopio University, Athens, Greece. <sup>44</sup>William Harvey Research Institute, Barts and The London School of Medicine and Dentistry, Queen Mary University London, London, UK. <sup>45</sup>Department of Genetic Medicine and Development, University of Geneva Medical School, Geneva, Switzerland. <sup>46</sup>Biomedical Sciences Research Center Al. Fleming, Vari, Greece. <sup>47</sup>Inserm UMR 1087, Nantes, France. <sup>48</sup>CNRS-UMR-6291, Nantes, France. <sup>49</sup>Nantes University, Nantes, France. <sup>50</sup>Diabetes Research Centre, Biomedical Research Institute, University of Dundee, Ninewells Hospital, Dundee, UK. <sup>51</sup>Pharmacogenomics Centre, Biomedical Research Institute, University of Dundee, Ninewells Hospital, Dundee, UK. <sup>52</sup>Department of Statistics, University of Oxford, Oxford, UK. <sup>53</sup>Lund University Diabetes Centre, Department of Clinical Science Malmo, NovoNordisk Scandinavia AB, Malmo, Sweden. <sup>54</sup>Department of Epidemiology, Erasmus University Medical Center, Rotterdam, The Netherlands. <sup>55</sup>Netherlands Genomics Initiative, Netherlands Consortium for Healthy Ageing and Center for Medical Systems Biology, Rotterdam, The Netherlands. <sup>56</sup>National Heart, Lung, and Blood Institute's Framingham Heart Study, Framingham, MA, USA. <sup>57</sup>Institute for Medical Informatics, Biometry and Epidemiology, University Hospital of Essen, Essen, Germany. <sup>58</sup>Icelandic Heart Association, Kopavogur, Iceland. <sup>59</sup>Clinic of Cardiology, West German Heart Centre, University Hospital of Essen, University Duisburg-Essen, Essen, Germany. <sup>60</sup>Department of Chronic Disease Prevention, National Institute for Health and Welfare, Helsinki, Finland. <sup>61</sup>Department of General Practice and Primary Health Care, University of Helsinki, Helsinki, Finland. <sup>62</sup>Unit of General Practice, Helsinki University General Hospital, Helsinki, Finland. <sup>63</sup>Folkhalsan Research Center, Helsinki, Finland. <sup>64</sup>Estonian Genome Center, University of Tartu, Tartu, Estonia. <sup>65</sup>Division of Endocrinology, Children's Hospital, Boston, MA, USA. <sup>66</sup>Program in Medical and Population Genetics, Broad Institute, Cambridge, MA, USA. <sup>67</sup>CNRS-UMR-8199, Institute of Biology and Lille 2 University, Pasteur Institute, Lille, France. <sup>68</sup>Department of Medicine, Imperial College London, London, UK. <sup>69</sup>Institut d'Investigacions Biomediques August Pi i Sunyer, Centre Esther Koplowitz, Barcelona, Spain. <sup>70</sup>Department of Medicine, Harvard Medical School, Boston, MA, USA. <sup>71</sup>Center for Human Genetic Research, Massachusetts General Hospital, Boston, MA, USA. <sup>72</sup>Diabetes Research Center, Diabetes Unit, Massachusetts General Hospital, Boston, MA, USA. <sup>73</sup>MRC Epidemiology Unit, University of Cambridge School of Clinical Medicine, Institute of Metabolic Science, Cambridge Biomedical Campus, Cambridge, UK. <sup>74</sup>Division of Endocrinology and Metabolism, Brigham and Women's Hospital and Harvard Medical School, Boston, MA, USA. <sup>75</sup>Atherosclerosis Research Unit, Department of Medicine Solna, Karolinska Institutet, Stockholm, Sweden. <sup>76</sup>Science for Life Laboratory, Stockholm, Sweden. <sup>77</sup>Department for Numerical Analysis and Computer Science, Stockholm University, Stockholm, Sweden. <sup>78</sup>Department of Clinical Sciences, Lund University, Malmo, Sweden. <sup>79</sup>Department of Public Health and Clinical Medicine, Umea University, Umea, Sweden. <sup>80</sup>Genetics of Complex Traits, University of Exeter Medical School, University of Exeter, Exeter, UK. <sup>81</sup>Genomics of Common Disease, Imperial College London, London, UK. <sup>82</sup>Department of Genetics, Stanford University, Stanford, CA, USA. <sup>83</sup>Research Unit of Molecular Epidemiology, Helmholtz Zentrum Muenchen, German Research Centre for Environmental Health, Neuherberg, Germany. <sup>84</sup>Institute of Epidemiology II, Helmholtz Zentrum Muenchen, German Research Center for Environmental Health, Neuherberg, Germany. <sup>85</sup>Oxford National Institute for Health Research Biomedical Research Centre, Churchill Hospital, Oxford, UK. <sup>86</sup>German Center for Diabetes Research,

Neuherberg, Germany. <sup>87</sup>The Novo Nordisk Foundation Center for Basic Metabolic Research, Faculty of Health and Medical Sciences, University of Copenhagen, Copenhagen, Denmark. <sup>88</sup>Department of Medical Sciences, Molecular Epidemiology and Science for Life Laboratory, Uppsala University, Uppsala, Sweden. <sup>89</sup>Faculty of Health Sciences, University of Southern Denmark, Odense, Denmark. <sup>90</sup>Kuopio Research Institute of Exercise Medicine, Kuopio, Finland. <sup>91</sup>Institute of Biomedical and Clinical Science, University of Exeter Medical School, Exeter, UK. <sup>92</sup>Institute for Clinical Diabetology, German Diabetes Center, Leibniz Center for Diabetes Research at Heinrich Heine University Dusseldorf, Dusseldorf, Germany. <sup>93</sup>German Center for Diabetes Research, Partner Site Dusseldorf, Germany. <sup>94</sup>HUNT Research Center, Department of Public Health and General Practice, Norwegian University of Science and Technology, Levanger, Norway. <sup>95</sup>Department of Vascular Medicine, Academic Medical Center, University of Amsterdam, Amsterdam, The Netherlands. <sup>96</sup>Department of Epidemiology, Harvard School of Public Health, Boston, MA, USA. <sup>97</sup>Channing Division of Network Medicine, Department of Medicine, Brigham and Women's Hospital and Harvard Medical School, Boston, MA, USA. <sup>98</sup>School of Population Health, University of Western Australia, Nedlands, Australia. <sup>99</sup>Cardiovascular Genetics, BHF Laboratories, Institute Cardiovascular Sciences, UCL, London, UK. <sup>100</sup>Program in Genetic Epidemiology and Statistical Genetics, Harvard School of Public Health, Boston, MA, USA. <sup>101</sup>Hannover Unified Biobank, Hannover Medical School, Hannover, Germany. <sup>102</sup>Department of Pulmonary Physiology and Sleep Medicine, West Australian Sleep Disorders Research Institute, Queen Elizabeth II Medical Centre, Nedlands, Australia. <sup>103</sup>School of Medicine and Pharmacology, University of Western Australia, Nedlands, Australia. <sup>104</sup>Steno Diabetes Center, Gentofte, Denmark. <sup>105</sup>Research Centre for Prevention and Health, Capital Region of Denmark, Copenhagen, Denmark. <sup>106</sup>Faculty of Health and Medical Sciences, University of Copenhagen, Copenhagen, Denmark. <sup>107</sup>Faculty of Medicine, University of Aalborg, Aalborg, Denmark. <sup>108</sup>Department of Epidemiology, Johns Hopkins Bloomberg School of Public Health, Baltimore, MD, USA. <sup>109</sup>Cardiovascular Research Center, Massachusetts General Hospital, Boston, MA, USA. <sup>110</sup>Faculty of Medicine, Institute of Health Sciences, University of Oulu, Oulu, Finland. <sup>111</sup>Unit of General Practice, Oulu University Hospital, Oulu, Finland. <sup>112</sup>Leibniz Institute for Age Research, Fritz Lipmann Institute, Jena, Germany. <sup>113</sup>Medical Systems Biology, Ulm University, Ulm, Germany. <sup>114</sup>Department of Medicine, Division of Endocrinology, Helsinki University Central Hospital, Helsinki, Finland. <sup>115</sup>Minerva Foundation Institute for Medical Research, Helsinki, Finland. <sup>116</sup>deCODE Genetics, Amgen inc., Reykjavik, Iceland. <sup>117</sup>South Ostrobothnia Central Hospital, Seinajoki, Finland. <sup>118</sup>Department of Medicine, University of Eastern Finland and Kuopio University Hospital, Kuopio, Finland. <sup>119</sup>Institute of Biomedicine/Physiology, University of Eastern Finland, Kuopio, Finland. <sup>120</sup>Department of Clinical Physiology and Nuclear Medicine, Kuopio University Hospital, Kuopio, Finland. <sup>121</sup>Institute of Human Genetics, Helmholtz Zentrum Muenchen, German Research Center for Environmental Health, Neuherberg, Germany. <sup>122</sup>Department of Medical Sciences, Uppsala University Hospital, Uppsala, Sweden. <sup>123</sup>Icahn Institute for Genomics and Multiscale Biology, Icahn School of Medicine at Mount Sinai, New York, NY, USA. <sup>124</sup>Copenhagen University Hospital, Rigshospitalet, Denmark. <sup>125</sup>Department of Clinical Medicine, Faculty of Health and Medical Sciences, University of Copenhagen, Denmark. <sup>126</sup>The Genetics of Obesity and Related Metabolic Traits Program, The Icahn School of Medicine at Mount Sinai, New York, NY, USA. <sup>127</sup>The Mindich Child Health and Development Institute, Icahn School of Medicine at Mount Sinai, New York, NY, USA. <sup>128</sup>General Medicine Division, Massachusetts General Hospital, MA, USA. <sup>129</sup>Institute of Molecular and Cell Biology, University of Tartu, Tartu, Estonia. <sup>130</sup>Institute of Genetic Epidemiology, Helmholtz Zentrum Muenchen, German Research Center for Environmental Health, Neuherberg, Germany. <sup>131</sup>BRC Genomics Core Facility, GSTT Foundation Trust, Guy's & St Thomas' Hospital, London. <sup>132</sup>Department of Genetics, University of North Carolina, Chapel Hill, NC, USA. <sup>133</sup>Usher Institute of Population Health Sciences and Informatics, University of Edinburgh, Edinburgh, UK. <sup>134</sup>Department of Biostatistics, University of Liverpool, Liverpool, UK. <sup>135</sup>Department of Molecular and Clinical Pharmacology, University of Liverpool, Liverpool, UK. <sup>136</sup>Institute of Human Genetics, University of Bonn, Bonn, Germany. <sup>137</sup>Department of Genomics, Life & Brain Center,

University of Bonn, Bonn, Germany. <sup>138</sup>Institute of Neuroscience and Medicine (INM-1), Research Centre Jülich, D-52425 Jülich, Germany. <sup>139</sup>Department of Medicine I, University Hospital Grosshadern, Ludwig-Maximilians-Universität, Munich, Germany. <sup>140</sup>Institute of Medical Informatics, Biometry and Epidemiology, Chair of Genetic Epidemiology, Ludwig-Maximilians-Universität, Neuherberg, Germany. <sup>141</sup>DZHK (German Centre for Cardiovascular Research), partner site Munich Heart Alliance, Munich, Germany. <sup>142</sup>Respiratory Medicine, Sir Charles Gairdner Hospital, Nedlands, Australia. <sup>143</sup>Department of Epidemiology, Murcia Regional Health Council, IMIB-Arrixaca, Murcia, Spain. <sup>144</sup>CIBER Epidemiología y Salud Pública (CIBERESP), Spain. <sup>145</sup>Department of Health and Social Sciences, Universidad de Murcia, Murcia, Spain. <sup>146</sup>Department of Community Medicine, Faculty of Health Sciences, University of Tromsø, Tromsø, Norway. <sup>147</sup>Centre for Cellular and Molecular Physiology, Nuffield Department of Medicine, University of Oxford, Oxford, UK. <sup>148</sup>Cancer Research and Prevention Institute (ISPO), Florence, Italy. <sup>149</sup>Division of Epidemiology and Community Health, University of Minnesota, Minneapolis, MN, USA. <sup>150</sup>Division of Endocrinology, Germans Trias i Pujol University Hospital and Research Institute, Badalona, Spain. <sup>151</sup>Josep Carreras Leukaemia Research Institute, Badalona, Spain. <sup>152</sup>CIBER de Diabetes y Enfermedades Metabólicas Asociadas (CIBERDEM), Barcelona, Spain. <sup>153</sup>Department of Medical Epidemiology and Biostatistics, Karolinska Institutet, Stockholm, Sweden. <sup>154</sup>Department of Internal Medicine, Levanger Hospital, Nord-Trøndelag Health Trust, Levanger, Norway. <sup>155</sup>Department of Epidemiology, School of Public Health and Tropical Medicine, Tulane University, New Orleans, Louisiana. <sup>156</sup>University General Hospital Attikon, Athens, Greece. <sup>157</sup>Institute of Biometrics and Epidemiology, German Diabetes Center, Leibniz Center for Diabetes Research at Heinrich Heine University Düsseldorf, Düsseldorf, Germany. <sup>158</sup>Division of Rheumatology, Immunology and Allergy, Brigham and Women's Hospital, Harvard Medical School, Boston, MA, USA. <sup>159</sup>Partners Center for Personalized Genomic Medicine, Boston, MA, USA. <sup>160</sup>Public Health Genomics Unit, National Institute for Health and Welfare, Helsinki, Finland. <sup>161</sup>Department of Public Health, Hjelt Institute, University of Helsinki, Helsinki, Finland. <sup>162</sup>Department of Endocrinology and Diabetology, University Hospital Dusseldorf, Dusseldorf, Germany. <sup>163</sup>Health Science and Technology MD Program, Harvard University and Massachusetts Institute of Technology, Boston, MA, USA. <sup>164</sup>Harvard Biological and Biomedical Sciences Program, Harvard University, Boston, MA, USA. <sup>165</sup>Division of Psychiatric Genomics, Department of Psychiatry, Icahn School of Medicine at Mount Sinai, New York, New York, USA. <sup>166</sup>Boston University Data Coordinating Center, Boston, MA, USA. <sup>167</sup>Finnish Diabetes Association, Tampere, Finland. <sup>168</sup>Pirkanmaa District Hospital, Tampere, Finland. <sup>169</sup>Center for Non-Communicable Diseases Pakistan, Karachi, Pakistan. <sup>170</sup>Department of Medicine, Central Finland Central Hospital, Jyväskylä, Finland. <sup>171</sup>South Karelia Central Hospital, Lappeenranta, Finland. <sup>172</sup>University Medical Center Utrecht, Utrecht, The Netherlands. <sup>173</sup>UCL Genetics Institute, Department of Genetics, Evolution and Environment, University College London, London, UK. <sup>174</sup>Division of Endocrinology, Diabetes and Nutrition, University of Maryland School of Medicine, Baltimore, MD, USA. <sup>175</sup>Geriatric Research Education and Clinical Center, Baltimore Veterans Administration Medical Center, Baltimore, MD, USA. <sup>176</sup>Program in Personalised and Genomic Medicine, University of Maryland School of Medicine, Baltimore, MD, USA. <sup>177</sup>Department of Internal Medicine, Erasmus University Medical Center, Rotterdam, The Netherlands. <sup>178</sup>Center for Molecular Medicine, Karolinska University Hospital Solna, Stockholm, Sweden. <sup>179</sup>Montreal Diabetes Research Center, Centre de Recherche du Centre Hospitalier de l'Université de Montréal, Montreal, Canada. <sup>180</sup>McGill University and Centre d'Innovation Génome Québec, Montreal, Canada. <sup>181</sup>Department of Clinical Chemistry and Central Laboratory, University of Ulm, Ulm, Germany. <sup>182</sup>Molecular Medicine, Department of Medical Sciences, Uppsala University, Uppsala, Sweden. <sup>183</sup>Department of Endocrinology, Abdominal Center, Helsinki University Hospital, Helsinki, Finland. <sup>184</sup>Research Program for Diabetes and Obesity, University of Helsinki, Helsinki, Finland. <sup>185</sup>Instituto de Investigación Sanitaria del Hospital Universitario LaPaz, Madrid, Spain. <sup>186</sup>Centre for Vascular Prevention, Danube-University Krems, Krems, Austria. <sup>187</sup>Diabetes Research Group, King Abdulaziz University, Jeddah, Saudi Arabia. <sup>188</sup>Perelman School of Medicine, Department of Pharmacology, University of Pennsylvania,



Philadelphia, PA, USA. <sup>189</sup>Department of Genetics, Harvard Medical School, Boston, MA, USA.  
<sup>190</sup>Department of Molecular Biology, Harvard Medical School, Boston, MA, USA.
